# Supplementary material for: Theobroma cacao L. pathogenesis-related gene tandem array members show diverse expression dynamics in response to pathogen colonization
Source: PubMed Central journal article supplement (PMC4869279; doi:10.1186/s12864-016-2693-3), 2016-05-17
Supplement: 12864_2016_2693_MOESM1_ESM.pdf [file 12864_2016_2693_MOESM1_ESM.pdf]

| Supplemental Table S2 - PR gene positions in Criollo genome, color-coded by PR gene family |          |          |                |              |                 |
|--------------------------------------------------------------------------------------------|----------|----------|----------------|--------------|-----------------|
| Chromosome                                                                                 | Start    | Stop     | PR Gene Family | Gene ID      | Tandem Array ID |
| Chr1                                                                                       | 46446    | 50611    | PR-7           | Tc01_g000090 |                 |
| Chr1                                                                                       | 407076   | 408180   | PR-3           | Tc01_g000770 | Chr1PR-3.1      |
| Chr1                                                                                       | 416020   | 417055   | PR-3           | Tc01_g000800 | Chr1PR-3.1      |
| Chr1                                                                                       | 592960   | 594207   | PR-9           | Tc01_g001190 |                 |
| Chr1                                                                                       | 756862   | 758055   | PR-5           | Tc01_g001580 | Chr1PR-5.2      |
| Chr1                                                                                       | 764592   | 765968   | PR-5           | Tc01_g001590 | Chr1PR-5.2      |
| Chr1                                                                                       | 1223958  | 1225321  | PR-9           | Tc01_g002490 |                 |
| Chr1                                                                                       | 2046944  | 2047477  | PR-1           | Tc01_g003940 |                 |
| Chr1                                                                                       | 2390176  | 2391738  | PR-9           | Tc01_g004590 |                 |
| Chr1                                                                                       | 2797614  | 2800013  | PR-7           | Tc01_g005210 | Chr1PR-7.3      |
| Chr1                                                                                       | 2801937  | 2804204  | PR-7           | Tc01_g005220 | Chr1PR-7.3      |
| Chr1                                                                                       | 3352887  | 3355169  | PR-7           | Tc01_g006160 |                 |
| Chr1                                                                                       | 3427643  | 3429296  | PR-9           | Tc01_g006280 |                 |
| Chr1                                                                                       | 3517917  | 3519445  | PR-2           | Tc01_g006420 |                 |
| Chr1                                                                                       | 5006124  | 5007854  | PR-9           | Tc01_g008530 |                 |
| Chr1                                                                                       | 6168606  | 6170228  | PR-2           | Tc01_g010310 | Chr1PR-2.4      |
| Chr1                                                                                       | 6172632  | 6176254  | PR-2           | Tc01_g010320 | Chr1PR-2.4      |
| Chr1                                                                                       | 6221240  | 6222258  | PR-3           | Tc01_g010350 |                 |
| Chr1                                                                                       | 8521396  | 8522841  | PR-9           | Tc01_g013330 |                 |
| Chr1                                                                                       | 9077679  | 9080866  | PR-2           | Tc01_g014030 |                 |
| Chr1                                                                                       | 12365543 | 12367610 | PR-2           | Tc01_g017650 |                 |
| Chr1                                                                                       | 15266578 | 15268183 | PR-2           | Tc01_g021070 |                 |
| Chr1                                                                                       | 21684400 | 21686697 | PR-7           | Tc01_g026170 |                 |
| Chr1                                                                                       | 24449757 | 24451200 | PR-9           | Tc01_g029350 |                 |
| Chr1                                                                                       | 25614422 | 25615074 | PR-10          | Tc01_g031100 |                 |
| Chr1                                                                                       | 26238743 | 26239660 | PR-8           | Tc01_g032120 |                 |
| Chr1                                                                                       | 26379168 | 26379491 | PR-8           | Tc01_g032260 |                 |
| Chr1                                                                                       | 26567546 | 26568662 | PR-9           | Tc01_g032570 |                 |
| Chr1                                                                                       | 26825013 | 26825938 | PR-3           | Tc01_g032950 |                 |
| Chr1                                                                                       | 26960822 | 26961584 | PR-16          | Tc01_g033170 |                 |
| Chr1                                                                                       | 27725371 | 27726015 | PR-1           | Tc01_g034430 |                 |
| Chr1                                                                                       | 27788216 | 27788682 | PR-14          | Tc01_g034520 |                 |
| Chr1                                                                                       | 28094750 | 28095737 | PR-8           | Tc01_g035050 | Chr1PR-8.5      |
| Chr1                                                                                       | 28098396 | 28099445 | PR-8           | Tc01_g035060 | Chr1PR-8.5      |
| Chr1                                                                                       | 28136550 | 28137445 | PR-8           | Tc01_g035140 | Chr1PR-8.5      |

|      |          |          |       |              |             |
|------|----------|----------|-------|--------------|-------------|
| Chr1 | 28139089 | 28139985 | PR-8  | Tc01_g035150 | Chr1PR-8.5  |
| Chr1 | 28141342 | 28142244 | PR-8  | Tc01_g035160 | Chr1PR-8.5  |
| Chr1 | 29089378 | 29096068 | PR-7  | Tc01_g037010 | Chr1PR-7.6  |
| Chr1 | 29099230 | 29102593 | PR-7  | Tc01_g037020 | Chr1PR-7.6  |
| Chr1 | 29106890 | 29110006 | PR-7  | Tc01_g037030 | Chr1PR-7.6  |
| Chr1 | 29115406 | 29119284 | PR-7  | Tc01_g037040 | Chr1PR-7.6  |
| Chr1 | 30267844 | 30268167 | PR-14 | Tc01_g039190 |             |
|      |          |          |       |              |             |
| Chr2 | 1453223  | 1453702  | PR-1  | Tc02_g002380 | Chr2PR-1.1  |
| Chr2 | 1454367  | 1454837  | PR-1  | Tc02_g002390 | Chr2PR-1.1  |
| Chr2 | 1456734  | 1457219  | PR-1  | Tc02_g002400 | Chr2PR-1.1  |
| Chr2 | 1460085  | 1460573  | PR-1  | Tc02_g002410 | Chr2PR-1.1  |
| Chr2 | 1463710  | 1464189  | PR-1  | Tc02_g002420 | Chr2PR-1.1  |
| Chr2 | 1465775  | 1466269  | PR-1  | Tc02_g002430 | Chr2PR-1.1  |
| Chr2 | 1782306  | 1783525  | PR-5  | Tc02_g003020 |             |
| Chr2 | 1834936  | 1836914  | PR-9  | Tc02_g003150 |             |
| Chr2 | 2204825  | 2205983  | PR-3  | Tc02_g003890 |             |
| Chr2 | 2838778  | 2841102  | PR-7  | Tc02_g005130 |             |
| Chr2 | 2891313  | 2892972  | PR-5  | Tc02_g005190 | Chr2PR-5.2  |
| Chr2 | 2900033  | 2902683  | PR-5  | Tc02_g005200 | Chr2PR-5.2  |
| Chr2 | 3567043  | 3567463  | PR-12 | Tc02_g006630 | Chr2PR-12.3 |
| Chr2 | 3574782  | 3574952  | PR-12 | Tc02_g006660 | Chr2PR-12.3 |
| Chr2 | 3791974  | 3796328  | PR-2  | Tc02_g007080 |             |
| Chr2 | 3911517  | 3916523  | PR-7  | Tc02_g007300 |             |
| Chr2 | 4604542  | 4606761  | PR-9  | Tc02_g008380 |             |
| Chr2 | 5265134  | 5265811  | PR-17 | Tc02_g009590 | Chr2PR-17.4 |
| Chr2 | 5268266  | 5269520  | PR-17 | Tc02_g009600 | Chr2PR-17.4 |
| Chr2 | 5272315  | 5273019  | PR-17 | Tc02_g009610 | Chr2PR-17.4 |
| Chr2 | 5280292  | 5280972  | PR-17 | Tc02_g009630 | Chr2PR-17.4 |
| Chr2 | 5290110  | 5290810  | PR-17 | Tc02_g009650 | Chr2PR-17.4 |
| Chr2 | 5714692  | 5716563  | PR-1  | Tc02_g010380 |             |
| Chr2 | 6680377  | 6681597  | PR-9  | Tc02_g011920 | Chr2PR-9.5  |
| Chr2 | 6688821  | 6690092  | PR-9  | Tc02_g011930 | Chr2PR-9.5  |
| Chr2 | 6692863  | 6694134  | PR-9  | Tc02_g011940 | Chr2PR-9.5  |
| Chr2 | 6698094  | 6699389  | PR-9  | Tc02_g011950 | Chr2PR-9.5  |
| Chr2 | 6701728  | 6702974  | PR-9  | Tc02_g011960 | Chr2PR-9.5  |
| Chr2 | 6713925  | 6715033  | PR-9  | Tc02_g011990 | Chr2PR-9.5  |
| Chr2 | 6725602  | 6726798  | PR-9  | Tc02_g012000 | Chr2PR-9.5  |
| Chr2 | 6728402  | 6732943  | PR-9  | Tc02_g012010 | Chr2PR-9.5  |

|      |          |          |       |              |            |
|------|----------|----------|-------|--------------|------------|
| Chr2 | 6733980  | 6735168  | PR-9  | Tc02_g012020 | Chr2PR-9.5 |
| Chr2 | 7596477  | 7598446  | PR-9  | Tc02_g013360 |            |
| Chr2 | 9964462  | 9964902  | PR-14 | Tc02_g016580 |            |
| Chr2 | 17976635 | 17977630 | PR-9  | Tc02_g022830 |            |
| Chr2 | 19074797 | 19075795 | PR-2  | Tc02_g023780 |            |
| Chr2 | 22789048 | 22793374 | PR-2  | Tc02_g028070 |            |
| Chr2 | 23779373 | 23780685 | PR-9  | Tc02_g029020 | Chr2PR-9.6 |
| Chr2 | 23812198 | 23813502 | PR-9  | Tc02_g029090 | Chr2PR-9.6 |
| Chr2 | 23817409 | 23818719 | PR-9  | Tc02_g029110 | Chr2PR-9.6 |
| Chr2 | 23827973 | 23829773 | PR-9  | Tc02_g029120 | Chr2PR-9.6 |
| Chr2 | 23839783 | 23845668 | PR-9  | Tc02_g029131 | Chr2PR-9.6 |
| Chr2 | 24935435 | 24936685 | PR-9  | Tc02_g030420 | Chr2PR-9.7 |
| Chr2 | 24943784 | 24945334 | PR-9  | Tc02_g030430 | Chr2PR-9.7 |
| Chr2 | 25295410 | 25295847 | PR-9  | Tc02_g030970 | Chr2PR-9.8 |
| Chr2 | 25297462 | 25298357 | PR-9  | Tc02_g030980 | Chr2PR-9.8 |
|      |          |          |       |              |            |
| Chr3 | 320042   | 321034   | PR-9  | Tc03_g000530 |            |
| Chr3 | 4837264  | 4838273  | PR-5  | Tc03_g005540 |            |
| Chr3 | 10318529 | 10319194 | PR-16 | Tc03_g009350 |            |
| Chr3 | 16215818 | 16223170 | PR-16 | Tc03_g016120 |            |
| Chr3 | 17331874 | 17332776 | PR-8  | Tc03_g017760 | Chr3PR-8.1 |
| Chr3 | 17340582 | 17341478 | PR-8  | Tc03_g017780 | Chr3PR-8.1 |
| Chr3 | 17344432 | 17345325 | PR-8  | Tc03_g017790 | Chr3PR-8.1 |
| Chr3 | 18014708 | 18017044 | PR-7  | Tc03_g018930 |            |
| Chr3 | 18236392 | 18237551 | PR-9  | Tc03_g019180 |            |
| Chr3 | 19476132 | 19478006 | PR-2  | Tc03_g021200 |            |
| Chr3 | 19763023 | 19766766 | PR-7  | Tc03_g021760 |            |
| Chr3 | 19837251 | 19838667 | PR-9  | Tc03_g021880 |            |
| Chr3 | 20186386 | 20189613 | PR-7  | Tc03_g022570 | Chr3PR-7.2 |
| Chr3 | 20192438 | 20196672 | PR-7  | Tc03_g022580 | Chr3PR-7.2 |
| Chr3 | 20198996 | 20202591 | PR-7  | Tc03_g022590 | Chr3PR-7.2 |
| Chr3 | 20236328 | 20237838 | PR-2  | Tc03_g022650 |            |
| Chr3 | 20812784 | 20814495 | PR-9  | Tc03_g023600 |            |
| Chr3 | 20873633 | 20874124 | PR-14 | Tc03_g023690 |            |
| Chr3 | 21230293 | 21255588 | PR-7  | Tc03_g024170 |            |
| Chr3 | 22569364 | 22573346 | PR-7  | Tc03_g026320 | Chr3PR-7.3 |
| Chr3 | 22574911 | 22577142 | PR-7  | Tc03_g026330 | Chr3PR-7.3 |
| Chr3 | 22578287 | 22580454 | PR-7  | Tc03_g026340 | Chr3PR-7.3 |
| Chr3 | 22705359 | 22708866 | PR-7  | Tc03_g026560 | Chr3PR-7.4 |

|      |          |          |       |              |             |
|------|----------|----------|-------|--------------|-------------|
| Chr3 | 22710814 | 22714408 | PR-7  | Tc03_g026570 | Chr3PR-7.4  |
| Chr3 | 22978758 | 22979435 | PR-5  | Tc03_g026960 | Chr3PR-5.5  |
| Chr3 | 22989396 | 22989923 | PR-5  | Tc03_g026980 | Chr3PR-5.5  |
| Chr3 | 22995503 | 22996177 | PR-5  | Tc03_g026990 | Chr3PR-5.5  |
| Chr3 | 22999218 | 22999882 | PR-5  | Tc03_g027000 | Chr3PR-5.5  |
| Chr3 | 23001302 | 23001976 | PR-5  | Tc03_g027010 | Chr3PR-5.5  |
| Chr3 | 23003689 | 23004303 | PR-5  | Tc03_g027020 | Chr3PR-5.5  |
| Chr3 | 23004849 | 23005571 | PR-5  | Tc03_g027030 | Chr3PR-5.5  |
| Chr3 | 24496301 | 24497326 | PR-2  | Tc03_g029620 |             |
|      |          |          |       |              |             |
| Chr4 | 255387   | 256364   | PR-9  | Tc04_g000340 |             |
| Chr4 | 1012521  | 1013740  | PR-8  | Tc04_g001620 |             |
| Chr4 | 2788623  | 2790250  | PR-9  | Tc04_g004350 | Chr4PR-9.1  |
| Chr4 | 2791630  | 2793436  | PR-9  | Tc04_g004360 | Chr4PR-9.1  |
| Chr4 | 2794822  | 2796456  | PR-9  | Tc04_g004370 | Chr4PR-9.1  |
| Chr4 | 8043355  | 8044235  | PR-5  | Tc04_g008530 |             |
| Chr4 | 11658052 | 11661012 | PR-2  | Tc04_g012520 |             |
| Chr4 | 12331457 | 12331935 | PR-14 | Tc04_g013310 |             |
| Chr4 | 13347034 | 13347476 | PR-5  | Tc04_g014480 |             |
| Chr4 | 14722179 | 14723300 | PR-9  | Tc04_g016340 |             |
| Chr4 | 14745374 | 14745865 | PR-14 | Tc04_g016380 | Chr4PR-14.2 |
| Chr4 | 14765307 | 14765876 | PR-14 | Tc04_g016400 | Chr4PR-14.2 |
| Chr4 | 14785146 | 14786072 | PR-14 | Tc04_g016440 | Chr4PR-14.2 |
| Chr4 | 14799364 | 14799929 | PR-14 | Tc04_g016450 | Chr4PR-14.2 |
| Chr4 | 15012802 | 15018041 | PR-9  | Tc04_g016710 | Chr4PR-9.3  |
| Chr4 | 15033309 | 15034430 | PR-9  | Tc04_g016740 | Chr4PR-9.3  |
| Chr4 | 15054772 | 15055892 | PR-9  | Tc04_g016760 | Chr4PR-9.3  |
| Chr4 | 15937181 | 15938075 | PR-3  | Tc04_g018090 | Chr4PR-3.4  |
| Chr4 | 15942222 | 15943027 | PR-3  | Tc04_g018100 | Chr4PR-3.4  |
| Chr4 | 15951169 | 15952222 | PR-3  | Tc04_g018110 | Chr4PR-3.4  |
| Chr4 | 15995814 | 15996879 | PR-3  | Tc04_g018160 | Chr4PR-3.4  |
| Chr4 | 17148238 | 17151103 | PR-9  | Tc04_g019840 |             |
| Chr4 | 17484077 | 17485694 | PR-2  | Tc04_g020310 |             |
| Chr4 | 17879840 | 17881090 | PR-5  | Tc04_g020870 |             |
| Chr4 | 19580508 | 19585108 | PR-2  | Tc04_g023620 |             |
| Chr4 | 21631422 | 21632757 | PR-9  | Tc04_g027220 | Chr4PR-9.5  |
| Chr4 | 21636062 | 21637717 | PR-9  | Tc04_g027230 | Chr4PR-9.5  |
| Chr4 | 22135251 | 22136317 | PR-9  | Tc04_g028060 |             |
| Chr4 | 22480311 | 22480887 | PR-10 | Tc04_g028740 | Chr4PR-10.6 |

|      |          |          |       |              |             |
|------|----------|----------|-------|--------------|-------------|
| Chr4 | 22481675 | 22482230 | PR-10 | Tc04_g028750 | Chr4PR-10.6 |
| Chr4 | 22483092 | 22483770 | PR-10 | Tc04_g028760 | Chr4PR-10.6 |
| Chr4 | 22489740 | 22490297 | PR-10 | Tc04_g028780 | Chr4PR-10.6 |
| Chr4 | 22492172 | 22492742 | PR-10 | Tc04_g028790 | Chr4PR-10.6 |
| Chr4 | 22494552 | 22495144 | PR-10 | Tc04_g028800 | Chr4PR-10.6 |
| Chr4 | 22499557 | 22500145 | PR-10 | Tc04_g028830 | Chr4PR-10.6 |
| Chr4 | 22501085 | 22501677 | PR-10 | Tc04_g028840 | Chr4PR-10.6 |
| Chr4 | 22504672 | 22505247 | PR-10 | Tc04_g028860 | Chr4PR-10.6 |
| Chr4 | 22506913 | 22507501 | PR-10 | Tc04_g028870 | Chr4PR-10.6 |
| Chr4 | 22508764 | 22509336 | PR-10 | Tc04_g028880 | Chr4PR-10.6 |
| Chr4 | 22511232 | 22511804 | PR-10 | Tc04_g028900 | Chr4PR-10.6 |
| Chr4 | 22515773 | 22516365 | PR-10 | Tc04_g028920 | Chr4PR-10.6 |
| Chr4 | 22517301 | 22517886 | PR-10 | Tc04_g028930 | Chr4PR-10.6 |
| Chr4 | 22518569 | 22519103 | PR-10 | Tc04_g028940 | Chr4PR-10.6 |
| Chr4 | 22641991 | 22643524 | PR-3  | Tc04_g029180 |             |
| Chr4 | 22709023 | 22712083 | PR-2  | Tc04_g029300 |             |
| Chr4 | 22833512 | 22834743 | PR-9  | Tc04_g029620 |             |
| Chr4 | 22935290 | 22936567 | PR-9  | Tc04_g029820 |             |
|      |          |          |       |              |             |
| Chr5 | 155638   | 156316   | PR-10 | Tc05_g000310 | Chr5PR-10.1 |
| Chr5 | 171073   | 171753   | PR-10 | Tc05_g000340 | Chr5PR-10.1 |
| Chr5 | 187696   | 188376   | PR-10 | Tc05_g000350 | Chr5PR-10.1 |
| Chr5 | 212396   | 215208   | PR-10 | Tc05_g000380 | Chr5PR-10.1 |
| Chr5 | 2252411  | 2253450  | PR-5  | Tc05_g004240 |             |
| Chr5 | 2957852  | 2958562  | PR-1  | Tc05_g005530 |             |
| Chr5 | 3297559  | 3300161  | PR-9  | Tc05_g006120 |             |
| Chr5 | 5445578  | 5446622  | PR-16 | Tc05_g008860 |             |
| Chr5 | 5854961  | 5858791  | PR-16 | Tc05_g009390 |             |
| Chr5 | 6655743  | 6659172  | PR-7  | Tc05_g010230 |             |
| Chr5 | 11319064 | 11321364 | PR-7  | Tc05_g013470 |             |
| Chr5 | 14642635 | 14643881 | PR-2  | Tc05_g016070 |             |
| Chr5 | 20017774 | 20018430 | PR-6  | Tc05_g022770 | Chr5PR-6.2  |
| Chr5 | 20026069 | 20026725 | PR-6  | Tc05_g022780 | Chr5PR-6.2  |
| Chr5 | 21264780 | 21265618 | PR-16 | Tc05_g024700 |             |
| Chr5 | 21455283 | 21456757 | PR-16 | Tc05_g024940 |             |
| Chr5 | 21700051 | 21700875 | PR-16 | Tc05_g025310 | Chr5PR-16.3 |
| Chr5 | 21705030 | 21705781 | PR-16 | Tc05_g025330 | Chr5PR-16.3 |
| Chr5 | 21713402 | 21714258 | PR-16 | Tc05_g025350 | Chr5PR-16.3 |
| Chr5 | 21715594 | 21718017 | PR-16 | Tc05_g025360 | Chr5PR-16.3 |

|      |          |          |       |              |             |
|------|----------|----------|-------|--------------|-------------|
| Chr5 | 21737964 | 21738819 | PR-16 | Tc05_g025400 | Chr5PR-16.3 |
| Chr5 | 21740097 | 21740875 | PR-16 | Tc05_g025410 | Chr5PR-16.3 |
| Chr5 | 21750659 | 21751516 | PR-16 | Tc05_g025420 | Chr5PR-16.3 |
| Chr5 | 21761479 | 21762326 | PR-16 | Tc05_g025430 | Chr5PR-16.3 |
| Chr5 | 21771629 | 21772485 | PR-16 | Tc05_g025440 | Chr5PR-16.3 |
| Chr5 | 21775301 | 21776123 | PR-16 | Tc05_g025450 | Chr5PR-16.3 |
| Chr5 | 21793844 | 21795080 | PR-16 | Tc05_g025470 | Chr5PR-16.3 |
| Chr5 | 21796024 | 21800895 | PR-16 | Tc05_g025480 | Chr5PR-16.3 |
| Chr5 | 21850086 | 21852832 | PR-16 | Tc05_g025520 | Chr5PR-16.3 |
| Chr5 | 21855659 | 21859290 | PR-16 | Tc05_g025530 | Chr5PR-16.3 |
| Chr5 | 23011025 | 23011535 | PR-4  | Tc05_g027210 | Chr5PR-4.4  |
| Chr5 | 23015545 | 23016832 | PR-4  | Tc05_g027220 | Chr5PR-4.4  |
| Chr5 | 23022482 | 23023859 | PR-4  | Tc05_g027230 | Chr5PR-4.4  |
| Chr5 | 23030430 | 23031726 | PR-4  | Tc05_g027250 | Chr5PR-4.4  |
| Chr5 | 23076382 | 23077121 | PR-4  | Tc05_g027320 | Chr5PR-4.4  |
| Chr5 | 23082584 | 23089537 | PR-4  | Tc05_g027340 | Chr5PR-4.4  |
| Chr5 | 23647781 | 23650823 | PR-2  | Tc05_g028370 |             |
| Chr5 | 25358388 | 25359598 | PR-9  | Tc05_g031640 |             |
| Chr5 | 25533413 | 25534642 | PR-16 | Tc05_g031880 |             |
|      |          |          |       |              |             |
| Chr6 | 283670   | 284572   | PR-16 | Tc06_g000370 | Chr6PR-16.1 |
| Chr6 | 288415   | 289525   | PR-16 | Tc06_g000400 | Chr6PR-16.1 |
| Chr6 | 342951   | 345342   | PR-3  | Tc06_g000490 |             |
| Chr6 | 512464   | 520849   | PR-7  | Tc06_g000810 |             |
| Chr6 | 627416   | 627703   | PR-14 | Tc06_g000990 | Chr6PR-14.2 |
| Chr6 | 628183   | 628635   | PR-14 | Tc06_g001000 | Chr6PR-14.2 |
| Chr6 | 1190282  | 1191669  | PR-2  | Tc06_g001730 |             |
| Chr6 | 7792149  | 7794494  | PR-9  | Tc06_g008540 |             |
| Chr6 | 8665491  | 8668445  | PR-16 | Tc06_g009700 |             |
| Chr6 | 9373572  | 9375890  | PR-7  | Tc06_g010630 |             |
| Chr6 | 10708214 | 10709837 | PR-2  | Tc06_g012580 |             |
| Chr6 | 11247628 | 11253176 | PR-7  | Tc06_g013520 |             |
| Chr6 | 12106897 | 12108599 | PR-9  | Tc06_g014950 |             |
| Chr6 | 14479691 | 14481234 | PR-9  | Tc06_g019150 |             |
| Chr6 | 14587458 | 14590282 | PR-2  | Tc06_g019320 |             |
| Chr6 | 14715208 | 14716459 | PR-9  | Tc06_g019650 |             |
| Chr6 | 14788011 | 14791633 | PR-7  | Tc06_g019800 |             |
| Chr6 | 14899115 | 14899570 | PR-14 | Tc06_g020010 | Chr6PR-14.3 |
| Chr6 | 14904636 | 14905201 | PR-14 | Tc06_g020030 | Chr6PR-14.3 |

|      |          |          |       |              |             |
|------|----------|----------|-------|--------------|-------------|
| Chr6 | 15375477 | 15378303 | PR-7  | Tc06_g021130 |             |
|      |          |          |       |              |             |
| Chr7 | 242337   | 248261   | PR-7  | Tc07_g000490 |             |
| Chr7 | 1373943  | 1375917  | PR-2  | Tc07_g002650 |             |
| Chr7 | 2469342  | 2470759  | PR-16 | Tc07_g004510 | Chr7PR-16.1 |
| Chr7 | 2541372  | 2545366  | PR-16 | Tc07_g004580 | Chr7PR-16.1 |
| Chr7 | 2656056  | 2656726  | PR-16 | Tc07_g004710 |             |
|      |          |          |       |              |             |
| Chr8 | 136530   | 138827   | PR-7  | Tc08_g000230 | Chr8PR-7.1  |
| Chr8 | 140672   | 142931   | PR-7  | Tc08_g000240 | Chr8PR-7.1  |
| Chr8 | 144535   | 148772   | PR-7  | Tc08_g000250 | Chr8PR-7.1  |
| Chr8 | 157014   | 159803   | PR-7  | Tc08_g000260 | Chr8PR-7.1  |
| Chr8 | 162515   | 164797   | PR-7  | Tc08_g000270 | Chr8PR-7.1  |
| Chr8 | 861589   | 862531   | PR-5  | Tc08_g001670 |             |
| Chr8 | 1035418  | 1037669  | PR-2  | Tc08_g001980 |             |
| Chr8 | 1251906  | 1252272  | PR-12 | Tc08_g002440 |             |
| Chr8 | 1392341  | 1393706  | PR-9  | Tc08_g002680 |             |
| Chr8 | 1982231  | 1984015  | PR-5  | Tc08_g003730 | Chr8PR-5.2  |
| Chr8 | 1994947  | 1996618  | PR-5  | Tc08_g003740 | Chr8PR-5.2  |
| Chr8 | 2135796  | 2139162  | PR-7  | Tc08_g004000 |             |
| Chr8 | 2171236  | 2172745  | PR-9  | Tc08_g004060 |             |
| Chr8 | 2812158  | 2813696  | PR-2  | Tc08_g005240 |             |
| Chr8 | 4454124  | 4457212  | PR-7  | Tc08_g007740 |             |
| Chr8 | 5838275  | 5839415  | PR-2  | Tc08_g009900 |             |
| Chr8 | 6072846  | 6074589  | PR-5  | Tc08_g010190 |             |
| Chr8 | 7977834  | 7979127  | PR-9  | Tc08_g012700 |             |
| Chr8 | 8542455  | 8545412  | PR-9  | Tc08_g013300 |             |
|      |          |          |       |              |             |
| Chr9 | 115915   | 118110   | PR-2  | Tc09_g000150 |             |
| Chr9 | 349534   | 350866   | PR-9  | Tc09_g000620 |             |
| Chr9 | 392587   | 393144   | PR-1  | Tc09_g000720 |             |
| Chr9 | 644365   | 645956   | PR-9  | Tc09_g001160 |             |
| Chr9 | 940710   | 942098   | PR-11 | Tc09_g001640 |             |
| Chr9 | 1746195  | 1747442  | PR-11 | Tc09_g003110 | Chr9PR-11.1 |
| Chr9 | 1748948  | 1752317  | PR-11 | Tc09_g003120 | Chr9PR-11.1 |
| Chr9 | 1754274  | 1755716  | PR-11 | Tc09_g003130 | Chr9PR-11.1 |
| Chr9 | 1756032  | 1759736  | PR-11 | Tc09_g003140 | Chr9PR-11.1 |
| Chr9 | 1761439  | 1764995  | PR-11 | Tc09_g003150 | Chr9PR-11.1 |
| Chr9 | 1765831  | 1767491  | PR-11 | Tc09_g003160 | Chr9PR-11.1 |

|       |          |          |       |              |             |
|-------|----------|----------|-------|--------------|-------------|
| Chr9  | 1771501  | 1774951  | PR-11 | Tc09_g003180 | Chr9PR-11.1 |
| Chr9  | 1784184  | 1785419  | PR-11 | Tc09_g003190 | Chr9PR-11.1 |
| Chr9  | 1786169  | 1787434  | PR-11 | Tc09_g003200 | Chr9PR-11.1 |
| Chr9  | 3455242  | 3457297  | PR-2  | Tc09_g006080 |             |
| Chr9  | 3924740  | 3927797  | PR-7  | Tc09_g006830 |             |
| Chr9  | 4056208  | 4056831  | PR-16 | Tc09_g007080 |             |
| Chr9  | 5106593  | 5109921  | PR-2  | Tc09_g008700 |             |
| Chr9  | 6108778  | 6111167  | PR-2  | Tc09_g010240 |             |
| Chr9  | 6842502  | 6843844  | PR-9  | Tc09_g011360 |             |
| Chr9  | 7056410  | 7061303  | PR-2  | Tc09_g011610 |             |
| Chr9  | 8542813  | 8545250  | PR-2  | Tc09_g013490 |             |
| Chr9  | 11250595 | 11251258 | PR-5  | Tc09_g016370 |             |
| Chr9  | 11463491 | 11464078 | PR-1  | Tc09_g016580 | Chr9PR-1.2  |
| Chr9  | 11465593 | 11466093 | PR-1  | Tc09_g016590 | Chr9PR-1.2  |
| Chr9  | 12561121 | 12565191 | PR-9  | Tc09_g017500 |             |
| Chr9  | 15718258 | 15718875 | PR-16 | Tc09_g019910 | Chr9PR-16.3 |
| Chr9  | 15720067 | 15720699 | PR-16 | Tc09_g019920 | Chr9PR-16.3 |
| Chr9  | 18149426 | 18155830 | PR-2  | Tc09_g021600 |             |
| Chr9  | 20183483 | 20184809 | PR-2  | Tc09_g023540 |             |
| Chr9  | 20776268 | 20777977 | PR-2  | Tc09_g024130 | Chr9PR-2.4  |
| Chr9  | 20788910 | 20789878 | PR-2  | Tc09_g024140 | Chr9PR-2.4  |
| Chr9  | 20791335 | 20792780 | PR-2  | Tc09_g024150 | Chr9PR-2.4  |
| Chr9  | 23914213 | 23916248 | PR-7  | Tc09_g028050 |             |
| Chr9  | 24349477 | 24353936 | PR-7  | Tc09_g028480 |             |
| Chr9  | 26293694 | 26295852 | PR-2  | Tc09_g031660 |             |
| Chr9  | 26452025 | 26452786 | PR-5  | Tc09_g031980 |             |
| Chr9  | 26838009 | 26841044 | PR-7  | Tc09_g032690 | Chr9PR-7.5  |
| Chr9  | 26843341 | 26846664 | PR-7  | Tc09_g032710 | Chr9PR-7.5  |
| Chr9  | 26853874 | 26856781 | PR-7  | Tc09_g032720 | Chr9PR-7.5  |
| Chr9  | 27978971 | 27981575 | PR-2  | Tc09_g034460 |             |
| Chr9  | 28169930 | 28171435 | PR-9  | Tc09_g034910 | Chr9PR-9.6  |
| Chr9  | 28177251 | 28179090 | PR-9  | Tc09_g034930 | Chr9PR-9.6  |
| Chr9  | 28180582 | 28182204 | PR-9  | Tc09_g034950 | Chr9PR-9.6  |
| Chr9  | 28271459 | 28271896 | PR-14 | Tc09_g035150 | Chr9PR-14.  |
| Chr9  | 28273057 | 28273520 | PR-14 | Tc09_g035160 | Chr9PR-14.  |
|       |          |          |       |              |             |
| Chr10 | 535646   | 537418   | PR-1  | Tc10_g000980 |             |
| Chr10 | 1257226  | 1258967  | PR-2  | Tc10_g002190 |             |
| Chr10 | 1321904  | 1325507  | PR-7  | Tc10_g002300 | Chr10PR-7.1 |



|          |          |          |       |              |             |
|----------|----------|----------|-------|--------------|-------------|
| Chr10    | 1326811  | 1330184  | PR-7  | Tc10_g002310 | Chr10PR-7.1 |
| Chr10    | 1331539  | 1343180  | PR-7  | Tc10_g002320 | Chr10PR-7.1 |
| Chr10    | 1359081  | 1365372  | PR-7  | Tc10_g002340 | Chr10PR-7.1 |
| Chr10    | 1374740  | 1384788  | PR-7  | Tc10_g002360 | Chr10PR-7.1 |
| Chr10    | 1680770  | 1681627  | PR-5  | Tc10_g002890 |             |
| Chr10    | 1889638  | 1891207  | PR-2  | Tc10_g003270 |             |
| Chr10    | 3651755  | 3652072  | PR-6  | Tc10_g005840 | Chr10PR-6.2 |
| Chr10    | 3660102  | 3660412  | PR-6  | Tc10_g005870 | Chr10PR-6.2 |
| Chr10    | 3662441  | 3662758  | PR-6  | Tc10_g005880 | Chr10PR-6.2 |
| Chr10    | 3669109  | 3669426  | PR-6  | Tc10_g005890 | Chr10PR-6.2 |
| Chr10    | 3678425  | 3684937  | PR-6  | Tc10_g005920 | Chr10PR-6.2 |
| Chr10    | 7845864  | 7846505  | PR-16 | Tc10_g009710 |             |
| Chr10    | 9700039  | 9702951  | PR-16 | Tc10_g011101 |             |
| Chr10    | 9724411  | 9725695  | PR-4  | Tc10_g011130 |             |
| Chr10    | 13313715 | 13314278 | PR-10 | Tc10_g014440 |             |
| Chr10    | 13971831 | 13973290 | PR-8  | Tc10_g015260 | Chr10PR-8.3 |
| Chr10    | 14003058 | 14003975 | PR-8  | Tc10_g015330 | Chr10PR-8.3 |
| Chr10    | 14505716 | 14507362 | PR-9  | Tc10_g015970 | Chr10PR-9.4 |
| Chr10    | 14567534 | 14568895 | PR-9  | Tc10_g016040 | Chr10PR-9.4 |
| Chr10    | 14583432 | 14584744 | PR-9  | Tc10_g016070 | Chr10PR-9.4 |
| Chr10    | 14585210 | 14586406 | PR-9  | Tc10_g016080 | Chr10PR-9.4 |
| Chr10    | 14753971 | 14754533 | PR-14 | Tc10_g016320 |             |
|          |          |          |       |              |             |
| Unmapped |          |          | PR-10 | Tc00_g031750 |             |
| Unmapped |          |          | PR-10 | Tc00_g071880 |             |
| Unmapped |          |          | PR-11 | Tc00_g043900 |             |
| Unmapped |          |          | PR-16 | Tc00_g013300 |             |
| Unmapped |          |          | PR-16 | Tc00_g037180 |             |
| Unmapped |          |          | PR-16 | Tc00_g054490 |             |
| Unmapped |          |          | PR-16 | Tc00_g054500 |             |
| Unmapped |          |          | PR-16 | Tc00_g076490 |             |
| Unmapped |          |          | PR-2  | Tc00_g034720 |             |
| Unmapped |          |          | PR-2  | Tc00_g054290 |             |
| Unmapped |          |          | PR-2  | Tc00_g083950 |             |
| Unmapped |          |          | PR-4  | Tc00_g012980 |             |
| Unmapped |          |          | PR-5  | Tc00_g056050 |             |
| Unmapped |          |          | PR-5  | Tc00_g056060 |             |
| Unmapped |          |          | PR-5  | Tc00_g056070 |             |
| Unmapped |          |          | PR-5  | Tc00_g056080 |             |

|          |  |  |      |              |  |
|----------|--|--|------|--------------|--|
| Unmapped |  |  | PR-5 | Tc00_g056110 |  |
| Unmapped |  |  | PR-5 | Tc00_g060970 |  |
| Unmapped |  |  | PR-6 | Tc00_g053480 |  |
| Unmapped |  |  | PR-7 | Tc00_g001690 |  |
| Unmapped |  |  | PR-7 | Tc00_g007300 |  |
| Unmapped |  |  | PR-7 | Tc00_g013470 |  |
| Unmapped |  |  | PR-7 | Tc00_g017310 |  |
| Unmapped |  |  | PR-7 | Tc00_g032610 |  |
| Unmapped |  |  | PR-7 | Tc00_g038560 |  |
| Unmapped |  |  | PR-8 | Tc00_g024510 |  |
| Unmapped |  |  | PR-9 | Tc00_g014230 |  |
| Unmapped |  |  | PR-9 | Tc00_g020190 |  |
| Unmapped |  |  | PR-9 | Tc00_g040640 |  |
| Unmapped |  |  | PR-9 | Tc00_g044710 |  |
| Unmapped |  |  | PR-9 | Tc00_g045360 |  |
| Unmapped |  |  | PR-9 | Tc00_g045400 |  |
| Unmapped |  |  | PR-9 | Tc00_g045440 |  |
| Unmapped |  |  | PR-9 | Tc00_g045460 |  |
| Unmapped |  |  | PR-9 | Tc00_g045610 |  |
| Unmapped |  |  | PR-9 | Tc00_g045630 |  |
| Unmapped |  |  | PR-9 | Tc00_g045940 |  |
| Unmapped |  |  | PR-9 | Tc00_g054480 |  |
