# Supplementary material for: Theobroma cacao L. pathogenesis-related gene tandem array members show diverse expression dynamics in response to pathogen colonization
Source: PubMed Central journal article supplement (PMC4869279; doi:10.1186/s12864-016-2693-3), 2016-05-17
Supplement: 12864_2016_2693_MOESM3_ESM.pdf [file 12864_2016_2693_MOESM3_ESM.pdf]

| Supplemental Table S3 - PR gene positions in the Matina 1-6 genome, color coded by PR gene family |          |          |             |                |                 |
|---------------------------------------------------------------------------------------------------|----------|----------|-------------|----------------|-----------------|
| Chromosome                                                                                        | Start    | Stop     | Gene Family | Gene ID        | Tandem Array ID |
| Chr1                                                                                              | 38970    | 43636    | PR-7        | Thecc1EG000009 |                 |
| Chr1                                                                                              | 398604   | 400143   | PR-3        | Thecc1EG000095 | Chr1PR-3.1      |
| Chr1                                                                                              | 407766   | 409127   | PR-3        | Thecc1EG000096 | Chr1PR-3.1      |
| Chr1                                                                                              | 581637   | 583276   | PR-9        | Thecc1EG000145 |                 |
| Chr1                                                                                              | 747046   | 754136   | PR-5        | Thecc1EG000193 | Chr1PR-5.2      |
| Chr1                                                                                              | 754379   | 756442   | PR-5        | Thecc1EG000197 | Chr1PR-5.2      |
| Chr1                                                                                              | 1211500  | 1213275  | PR-9        | Thecc1EG000295 |                 |
| Chr1                                                                                              | 2026978  | 2027875  | PR-1        | Thecc1EG000491 |                 |
| Chr1                                                                                              | 2357330  | 2362741  | PR-9        | Thecc1EG000564 |                 |
| Chr1                                                                                              | 2748608  | 2752027  | PR-7        | Thecc1EG000640 | Chr1PR-7.3      |
| Chr1                                                                                              | 2752856  | 2758066  | PR-7        | Thecc1EG000641 | Chr1PR-7.3      |
| Chr1                                                                                              | 3307000  | 3310286  | PR-7        | Thecc1EG000749 |                 |
| Chr1                                                                                              | 3382352  | 3384526  | PR-9        | Thecc1EG000762 |                 |
| Chr1                                                                                              | 3470261  | 3472558  | PR-2        | Thecc1EG000782 |                 |
| Chr1                                                                                              | 4992850  | 4995297  | PR-9        | Thecc1EG001054 |                 |
| Chr1                                                                                              | 6194523  | 6196823  | PR-2        | Thecc1EG001274 | Chr1PR-2.4      |
| Chr1                                                                                              | 6197493  | 6202783  | PR-2        | Thecc1EG001275 | Chr1PR-2.4      |
| Chr1                                                                                              | 6253057  | 6261425  | PR-3        | Thecc1EG001280 |                 |
| Chr1                                                                                              | 8613801  | 8616925  | PR-9        | Thecc1EG001664 |                 |
| Chr1                                                                                              | 9131329  | 9134274  | PR-9        | Thecc1EG001737 |                 |
| Chr1                                                                                              | 9483225  | 9487563  | PR-2        | Thecc1EG001794 |                 |
| Chr1                                                                                              | 12130265 | 12134160 | PR-2        | Thecc1EG002168 |                 |
| Chr1                                                                                              | 14155420 | 14183715 | PR-7        | Thecc1EG002479 |                 |
| Chr1                                                                                              | 16047163 | 16060417 | PR-2        | Thecc1EG002746 |                 |
| Chr1                                                                                              | 27707568 | 27712092 | PR-7        | Thecc1EG003899 |                 |
| Chr1                                                                                              | 29913675 | 29914468 | PR-6        | Thecc1EG004163 |                 |
| Chr1                                                                                              | 31982011 | 31984949 | PR-9        | Thecc1EG004510 |                 |
| Chr1                                                                                              | 33192758 | 33193694 | PR-10       | Thecc1EG004731 |                 |
| Chr1                                                                                              | 33839678 | 33841234 | PR-8        | Thecc1EG004867 |                 |
| Chr1                                                                                              | 34041089 | 34042770 | PR-9        | Thecc1EG004905 |                 |
| Chr1                                                                                              | 34305919 | 34307096 | PR-3        | Thecc1EG004953 |                 |
| Chr1                                                                                              | 34442576 | 34443701 | PR-16       | Thecc1EG004977 |                 |
| Chr1                                                                                              | 35302482 | 35303571 | PR-1        | Thecc1EG005149 |                 |
| Chr1                                                                                              | 35365490 | 35366160 | PR-14       | Thecc1EG005159 |                 |
| Chr1                                                                                              | 35671159 | 35672532 | PR-8        | Thecc1EG005226 | Chr1PR-8.5      |
| Chr1                                                                                              | 35674569 | 35675963 | PR-8        | Thecc1EG005227 | Chr1PR-8.5      |
| Chr1                                                                                              | 35712363 | 35718588 | PR-8        | Thecc1EG005236 | Chr1PR-8.5      |

|      |          |          |       |                |             |
|------|----------|----------|-------|----------------|-------------|
| Chr1 | 36672018 | 36676125 | PR-7  | Thecc1EG005449 | Chr1PR-7.6  |
| Chr1 | 36676173 | 36681516 | PR-7  | Thecc1EG005450 | Chr1PR-7.6  |
| Chr1 | 36681565 | 36693192 | PR-7  | Thecc1EG005451 | Chr1PR-7.6  |
| Chr1 | 36689354 | 36698417 | PR-7  | Thecc1EG005452 | Chr1PR-7.6  |
| Chr1 | 36697842 | 36703755 | PR-7  | Thecc1EG005453 | Chr1PR-7.6  |
| Chr1 | 37871369 | 37872238 | PR-14 | Thecc1EG005703 |             |
|      |          |          |       |                |             |
| Chr2 | 132261   | 139170   | PR-9  | Thecc1EG005974 |             |
| Chr2 | 1726070  | 1726919  | PR-1  | Thecc1EG006331 | Chr2PR-1.1  |
| Chr2 | 1727300  | 1728091  | PR-1  | Thecc1EG006332 | Chr2PR-1.1  |
| Chr2 | 1729729  | 1732901  | PR-1  | Thecc1EG006333 | Chr2PR-1.1  |
| Chr2 | 1736606  | 1737400  | PR-1  | Thecc1EG006335 | Chr2PR-1.1  |
| Chr2 | 2065004  | 2066485  | PR-5  | Thecc1EG006403 |             |
| Chr2 | 2117128  | 2118951  | PR-9  | Thecc1EG006416 |             |
| Chr2 | 2479366  | 2481072  | PR-3  | Thecc1EG006498 |             |
| Chr2 | 3126695  | 3129959  | PR-7  | Thecc1EG006646 |             |
| Chr2 | 3167231  | 3170972  | PR-5  | Thecc1EG006654 | Chr2PR-5.2  |
| Chr2 | 3176115  | 3179786  | PR-5  | Thecc1EG006655 | Chr2PR-5.2  |
| Chr2 | 3775808  | 3783306  | PR-7  | Thecc1EG006796 |             |
| Chr2 | 4126578  | 4127117  | PR-12 | Thecc1EG006852 |             |
| Chr2 | 4349987  | 4355168  | PR-2  | Thecc1EG006900 |             |
| Chr2 | 4794019  | 4796729  | PR-9  | Thecc1EG007001 |             |
| Chr2 | 5551606  | 5554475  | PR-17 | Thecc1EG007152 | Chr2PR-17.3 |
| Chr2 | 5554481  | 5555659  | PR-17 | Thecc1EG007153 | Chr2PR-17.3 |
| Chr2 | 5558506  | 5561482  | PR-17 | Thecc1EG007154 | Chr2PR-17.3 |
| Chr2 | 5566744  | 5567758  | PR-17 | Thecc1EG007156 | Chr2PR-17.3 |
| Chr2 | 5567811  | 5577818  | PR-17 | Thecc1EG007157 | Chr2PR-17.3 |
| Chr2 | 7394768  | 7402554  | PR-9  | Thecc1EG007510 | Chr2PR-9.4  |
| Chr2 | 7403090  | 7407224  | PR-9  | Thecc1EG007511 | Chr2PR-9.4  |
| Chr2 | 7407271  | 7413493  | PR-9  | Thecc1EG007512 | Chr2PR-9.4  |
| Chr2 | 7413305  | 7415134  | PR-9  | Thecc1EG007513 | Chr2PR-9.4  |
| Chr2 | 7417040  | 7418715  | PR-9  | Thecc1EG007514 | Chr2PR-9.4  |
| Chr2 | 7439241  | 7443374  | PR-9  | Thecc1EG007517 | Chr2PR-9.4  |
| Chr2 | 7447846  | 7449481  | PR-9  | Thecc1EG007520 | Chr2PR-9.4  |
| Chr2 | 8334315  | 8336188  | PR-9  | Thecc1EG007683 |             |
| Chr2 | 24981903 | 24982708 | PR-10 | Thecc1EG009531 | Chr2PR-10.5 |
| Chr2 | 25024282 | 25025861 | PR-10 | Thecc1EG009534 | Chr2PR-10.5 |
| Chr2 | 30987403 | 30988426 | PR-16 | Thecc1EG047006 |             |
| Chr2 | 31351157 | 31352561 | PR-9  | Thecc1EG010178 |             |
| Chr2 | 33006607 | 33010235 | PR-2  | Thecc1EG010376 |             |
| Chr2 | 37355734 | 37360729 | PR-2  | Thecc1EG011015 |             |
| Chr2 | 38066685 | 38068465 | PR-9  | Thecc1EG011110 | Chr2PR-10.6 |
| Chr2 | 38099456 | 38101161 | PR-9  | Thecc1EG011120 | Chr2PR-10.6 |

|      |          |          |       |                |             |
|------|----------|----------|-------|----------------|-------------|
| Chr2 | 38104677 | 38114221 | PR-9  | Thecc1EG011122 | Chr2PR-10.6 |
| Chr2 | 38115416 | 38117955 | PR-9  | Thecc1EG011127 | Chr2PR-10.6 |
| Chr2 | 38125903 | 38132675 | PR-9  | Thecc1EG011131 | Chr2PR-10.6 |
| Chr2 | 39415824 | 39417517 | PR-9  | Thecc1EG011321 | Chr2PR-10.7 |
| Chr2 | 39424078 | 39426119 | PR-9  | Thecc1EG011322 | Chr2PR-10.7 |
| Chr2 | 39784485 | 39788147 | PR-9  | Thecc1EG011379 |             |
|      |          |          |       |                |             |
| Chr3 | 328975   | 330626   | PR-9  | Thecc1EG011986 |             |
| Chr3 | 5703693  | 5724899  | PR-5  | Thecc1EG012750 |             |
| Chr3 | 24480780 | 24482254 | PR-16 | Thecc1EG014789 |             |
| Chr3 | 25746880 | 25750071 | PR-7  | Thecc1EG015025 |             |
| Chr3 | 25948395 | 25950349 | PR-9  | Thecc1EG015053 |             |
| Chr3 | 27251393 | 27261927 | PR-8  | Thecc1EG015301 | Chr3PR-8.1  |
| Chr3 | 27261974 | 27270447 | PR-8  | Thecc1EG015302 | Chr3PR-8.1  |
| Chr3 | 27295158 | 27296498 | PR-8  | Thecc1EG015309 | Chr3PR-8.1  |
| Chr3 | 27296548 | 27300338 | PR-8  | Thecc1EG015310 | Chr3PR-8.1  |
| Chr3 | 27302986 | 27307234 | PR-8  | Thecc1EG015311 | Chr3PR-8.1  |
| Chr3 | 27307314 | 27308817 | PR-8  | Thecc1EG015312 | Chr3PR-8.1  |
| Chr3 | 27316543 | 27317507 | PR-8  | Thecc1EG015314 | Chr3PR-8.1  |
| Chr3 | 28004792 | 28007761 | PR-2  | Thecc1EG015448 |             |
| Chr3 | 28291446 | 28296197 | PR-7  | Thecc1EG047016 |             |
| Chr3 | 28361776 | 28363762 | PR-9  | Thecc1EG015526 |             |
| Chr3 | 28708331 | 28713572 | PR-7  | Thecc1EG015601 | Chr3PR-7.2  |
| Chr3 | 28714480 | 28717151 | PR-7  | Thecc1EG015602 | Chr3PR-7.2  |
| Chr3 | 28716513 | 28725233 | PR-7  | Thecc1EG015603 | Chr3PR-7.2  |
| Chr3 | 28757267 | 28760786 | PR-2  | Thecc1EG015614 |             |
| Chr3 | 29543107 | 29545374 | PR-9  | Thecc1EG015775 |             |
| Chr3 | 29603566 | 29604758 | PR-14 | Thecc1EG015788 |             |
| Chr3 | 31421523 | 31428659 | PR-7  | Thecc1EG016128 | Chr3PR-7.3  |
| Chr3 | 31428746 | 31431000 | PR-7  | Thecc1EG016129 | Chr3PR-7.3  |
| Chr3 | 31565837 | 31569764 | PR-7  | Thecc1EG016158 | Chr3PR-7.4  |
| Chr3 | 31570739 | 31575604 | PR-7  | Thecc1EG016159 | Chr3PR-7.4  |
| Chr3 | 31839269 | 31840236 | PR-5  | Thecc1EG016204 | Chr3PR-5.5  |
| Chr3 | 31845292 | 31846336 | PR-5  | Thecc1EG016206 | Chr3PR-5.5  |
| Chr3 | 31847013 | 31849966 | PR-5  | Thecc1EG016207 | Chr3PR-5.5  |
| Chr3 | 31851312 | 31852270 | PR-5  | Thecc1EG016208 | Chr3PR-5.5  |
| Chr3 | 31854759 | 31856092 | PR-5  | Thecc1EG016209 | Chr3PR-5.5  |
| Chr3 | 33366769 | 33369207 | PR-2  | Thecc1EG016546 |             |
|      |          |          |       |                |             |
| Chr4 | 324124   | 325508   | PR-9  | Thecc1EG016814 |             |
| Chr4 | 1082546  | 1084164  | PR-8  | Thecc1EG016958 |             |
| Chr4 | 2432036  | 2434089  | PR-9  | Thecc1EG017229 | Chr4PR-9.1  |
| Chr4 | 2435085  | 2444110  | PR-9  | Thecc1EG017230 | Chr4PR-9.1  |

|      |          |          |       |                |             |
|------|----------|----------|-------|----------------|-------------|
| Chr4 | 10482455 | 10484484 | PR-5  | Thecc1EG018063 |             |
| Chr4 | 20312218 | 20317357 | PR-2  | Thecc1EG019120 |             |
| Chr4 | 21640200 | 21640902 | PR-14 | Thecc1EG019299 |             |
| Chr4 | 24438737 | 24442171 | PR-9  | Thecc1EG019706 |             |
| Chr4 | 24461787 | 24462534 | PR-14 | Thecc1EG019710 | Chr4PR-14.2 |
| Chr4 | 24480968 | 24481990 | PR-14 | Thecc1EG019712 | Chr4PR-14.2 |
| Chr4 | 24502230 | 24505993 | PR-14 | Thecc1EG019716 | Chr4PR-14.2 |
| Chr4 | 24518923 | 24519747 | PR-14 | Thecc1EG019718 | Chr4PR-14.2 |
| Chr4 | 24737036 | 24781021 | PR-9  | Thecc1EG019752 | Chr4PR-9.3  |
| Chr4 | 24737755 | 24740565 | PR-9  | Thecc1EG019753 | Chr4PR-9.3  |
| Chr4 | 24758134 | 24759674 | PR-9  | Thecc1EG019756 | Chr4PR-9.3  |
| Chr4 | 24785471 | 24788494 | PR-9  | Thecc1EG019760 | Chr4PR-9.3  |
| Chr4 | 24791739 | 24794455 | PR-9  | Thecc1EG019761 | Chr4PR-9.3  |
| Chr4 | 25647468 | 25651791 | PR-3  | Thecc1EG019909 | Chr4PR-3.4  |
| Chr4 | 25694796 | 25696329 | PR-3  | Thecc1EG019912 | Chr4PR-3.4  |
| Chr4 | 25703822 | 25704973 | PR-3  | Thecc1EG019913 | Chr4PR-3.4  |
| Chr4 | 25705022 | 25709845 | PR-3  | Thecc1EG019914 | Chr4PR-3.4  |
| Chr4 | 25896908 | 25899603 | PR-9  | Thecc1EG019959 |             |
| Chr4 | 27276438 | 27279822 | PR-2  | Thecc1EG020208 |             |
| Chr4 | 27670729 | 27672383 | PR-5  | Thecc1EG020283 |             |
| Chr4 | 29413526 | 29415586 | PR-2  | Thecc1EG020611 |             |
| Chr4 | 31669364 | 31671441 | PR-9  | Thecc1EG021109 | Chr4PR-9.5  |
| Chr4 | 31671546 | 31678459 | PR-9  | Thecc1EG021110 | Chr4PR-9.5  |
| Chr4 | 32119104 | 32121715 | PR-9  | Thecc1EG021202 |             |
| Chr4 | 32460298 | 32461096 | PR-10 | Thecc1EG021277 | Chr4PR-10.6 |
| Chr4 | 32461731 | 32462956 | PR-10 | Thecc1EG021278 | Chr4PR-10.6 |
| Chr4 | 32463079 | 32464245 | PR-10 | Thecc1EG021279 | Chr4PR-10.6 |
| Chr4 | 32469859 | 32470869 | PR-10 | Thecc1EG021281 | Chr4PR-10.6 |
| Chr4 | 32472553 | 32473339 | PR-10 | Thecc1EG021282 | Chr4PR-10.6 |
| Chr4 | 32477626 | 32478429 | PR-10 | Thecc1EG021284 | Chr4PR-10.6 |
| Chr4 | 32482792 | 32483593 | PR-10 | Thecc1EG021287 | Chr4PR-10.6 |
| Chr4 | 32485017 | 32485797 | PR-10 | Thecc1EG021288 | Chr4PR-10.6 |
| Chr4 | 32486846 | 32487676 | PR-10 | Thecc1EG021289 | Chr4PR-10.6 |
| Chr4 | 32489180 | 32490197 | PR-10 | Thecc1EG021291 | Chr4PR-10.6 |
| Chr4 | 32495448 | 32496548 | PR-10 | Thecc1EG021294 | Chr4PR-10.6 |
| Chr4 | 32496618 | 32497398 | PR-10 | Thecc1EG021295 | Chr4PR-10.6 |
| Chr4 | 32620132 | 32622079 | PR-3  | Thecc1EG021326 |             |
| Chr4 | 32685444 | 32691798 | PR-2  | Thecc1EG021342 |             |
| Chr4 | 32813328 | 32814949 | PR-9  | Thecc1EG021378 |             |
| Chr4 | 32911639 | 32915967 | PR-9  | Thecc1EG021402 |             |
|      |          |          |       |                |             |
| Chr5 | 1670681  | 1671852  | PR-5  | Thecc1EG021897 |             |

|      |          |          |       |                |             |
|------|----------|----------|-------|----------------|-------------|
| Chr5 | 2364984  | 2366039  | PR-1  | Thecc1EG022043 |             |
| Chr5 | 2695588  | 2698762  | PR-9  | Thecc1EG022117 |             |
| Chr5 | 3755038  | 3756269  | PR-5  | Thecc1EG022309 | Chr5PR-5.1  |
| Chr5 | 3758335  | 3760031  | PR-5  | Thecc1EG022310 | Chr5PR-5.1  |
| Chr5 | 3791716  | 3792976  | PR-5  | Thecc1EG022314 | Chr5PR-5.1  |
| Chr5 | 3840968  | 3842301  | PR-5  | Thecc1EG022319 | Chr5PR-5.1  |
| Chr5 | 5340366  | 5344406  | PR-7  | Thecc1EG022517 |             |
| Chr5 | 5797021  | 5798314  | PR-16 | Thecc1EG022573 |             |
| Chr5 | 6189727  | 6194196  | PR-16 | Thecc1EG022636 |             |
| Chr5 | 22512938 | 22520820 | PR-7  | Thecc1EG024130 |             |
| Chr5 | 26226678 | 26234169 | PR-2  | Thecc1EG024509 | Chr5PR-2.2  |
| Chr5 | 26267724 | 26269539 | PR-2  | Thecc1EG024514 | Chr5PR-2.2  |
| Chr5 | 29642537 | 29644495 | PR-9  | Thecc1EG024936 |             |
| Chr5 | 32085632 | 32088661 | PR-10 | Thecc1EG025354 | Chr5PR-10.3 |
| Chr5 | 32103102 | 32104002 | PR-10 | Thecc1EG025358 | Chr5PR-10.3 |
| Chr5 | 34273894 | 34274779 | PR-6  | Thecc1EG025715 | Chr5PR-6.4  |
| Chr5 | 34279871 | 34281266 | PR-6  | Thecc1EG025717 | Chr5PR-6.4  |
| Chr5 | 34805481 | 34844123 | PR-9  | Thecc1EG025806 |             |
| Chr5 | 35819221 | 35823224 | PR-16 | Thecc1EG025978 |             |
| Chr5 | 36102473 | 36104098 | PR-16 | Thecc1EG026019 |             |
| Chr5 | 36336863 | 36348253 | PR-16 | Thecc1EG026063 | Chr5PR-16.5 |
| Chr5 | 36352033 | 36353232 | PR-16 | Thecc1EG026065 | Chr5PR-16.5 |
| Chr5 | 36359172 | 36362528 | PR-16 | Thecc1EG026068 | Chr5PR-16.5 |
| Chr5 | 36362595 | 36365298 | PR-16 | Thecc1EG026069 | Chr5PR-16.5 |
| Chr5 | 36380524 | 36386728 | PR-16 | Thecc1EG026071 | Chr5PR-16.5 |
| Chr5 | 36386562 | 36388564 | PR-16 | Thecc1EG026073 | Chr5PR-16.5 |
| Chr5 | 36397149 | 36398236 | PR-16 | Thecc1EG026075 | Chr5PR-16.5 |
| Chr5 | 36398233 | 36425560 | PR-16 | Thecc1EG026076 | Chr5PR-16.5 |
| Chr5 | 36436073 | 36443005 | PR-16 | Thecc1EG026082 | Chr5PR-16.5 |
| Chr5 | 36443053 | 36450882 | PR-16 | Thecc1EG026084 | Chr5PR-16.5 |
| Chr5 | 36454203 | 36478357 | PR-16 | Thecc1EG026086 | Chr5PR-16.5 |
| Chr5 | 36474279 | 36524416 | PR-16 | Thecc1EG026091 | Chr5PR-16.5 |
| Chr5 | 36499184 | 36500352 | PR-16 | Thecc1EG026092 | Chr5PR-16.5 |
| Chr5 | 36519844 | 36520792 | PR-16 | Thecc1EG026096 | Chr5PR-16.5 |
| Chr5 | 36523344 | 36524570 | PR-16 | Thecc1EG026097 | Chr5PR-16.5 |
| Chr5 | 36543803 | 36544957 | PR-16 | Thecc1EG026105 | Chr5PR-16.5 |
| Chr5 | 37696481 | 37697365 | PR-4  | Thecc1EG026324 | Chr5PR-4.6  |
| Chr5 | 37701027 | 37709138 | PR-4  | Thecc1EG026326 | Chr5PR-4.6  |
| Chr5 | 37714713 | 37716374 | PR-4  | Thecc1EG026330 | Chr5PR-4.6  |
| Chr5 | 37736830 | 37738060 | PR-16 | Thecc1EG026333 |             |
| Chr5 | 37761863 | 37762800 | PR-4  | Thecc1EG026340 |             |
| Chr5 | 38325876 | 38329574 | PR-2  | Thecc1EG026450 |             |
| Chr5 | 40176700 | 40178520 | PR-9  | Thecc1EG026820 |             |

|      |          |          |       |                |             |
|------|----------|----------|-------|----------------|-------------|
| Chr5 | 40355024 | 40356650 | PR-16 | Thecc1EG026861 |             |
|      |          |          |       |                |             |
| Chr6 | 370465   | 371631   | PR-16 | Thecc1EG026931 | Chr6PR-16.1 |
| Chr6 | 372939   | 378215   | PR-16 | Thecc1EG026932 | Chr6PR-16.1 |
| Chr6 | 425768   | 428602   | PR-3  | Thecc1EG026942 |             |
| Chr6 | 565963   | 575546   | PR-7  | Thecc1EG026974 |             |
| Chr6 | 687608   | 688111   | PR-14 | Thecc1EG026996 | Chr6PR-14.2 |
| Chr6 | 688555   | 689089   | PR-14 | Thecc1EG026997 | Chr6PR-14.2 |
| Chr6 | 2009028  | 2026798  | PR-2  | Thecc1EG027171 |             |
| Chr6 | 2244627  | 2245484  | PR-4  | Thecc1EG027204 |             |
| Chr6 | 17845152 | 17848170 | PR-9  | Thecc1EG028741 |             |
| Chr6 | 20842639 | 20844719 | PR-16 | Thecc1EG029131 | Chr6PR-16.3 |
| Chr6 | 20862180 | 20863075 | PR-16 | Thecc1EG029135 | Chr6PR-16.3 |
| Chr6 | 20993519 | 20997653 | PR-7  | Thecc1EG029155 |             |
| Chr6 | 21455725 | 21458909 | PR-7  | Thecc1EG029233 |             |
| Chr6 | 22820859 | 22823230 | PR-2  | Thecc1EG029478 |             |
| Chr6 | 23349015 | 23355024 | PR-7  | Thecc1EG029591 |             |
| Chr6 | 24237351 | 24242736 | PR-9  | Thecc1EG029767 |             |
| Chr6 | 26264259 | 26266610 | PR-9  | Thecc1EG030222 |             |
| Chr6 | 26374015 | 26377587 | PR-2  | Thecc1EG030245 |             |
| Chr6 | 26496525 | 26502924 | PR-9  | Thecc1EG030283 |             |
| Chr6 | 26573080 | 26576918 | PR-7  | Thecc1EG030299 |             |
| Chr6 | 26689344 | 26690019 | PR-14 | Thecc1EG030328 |             |
| Chr6 | 27171220 | 27177050 | PR-7  | Thecc1EG030468 |             |
|      |          |          |       |                |             |
| Chr7 | 294277   | 301433   | PR-7  | Thecc1EG030557 |             |
| Chr7 | 1460699  | 1467312  | PR-2  | Thecc1EG030805 |             |
| Chr7 | 2417342  | 2418208  | PR-16 | Thecc1EG030994 |             |
| Chr7 | 5183291  | 5185283  | PR-8  | Thecc1EG031497 |             |
| Chr7 | 14781355 | 14784469 | PR-9  | Thecc1EG032808 |             |
|      |          |          |       |                |             |
| Chr8 | 246545   | 249638   | PR-7  | Thecc1EG033805 | Chr8PR-7.1  |
| Chr8 | 250441   | 269283   | PR-7  | Thecc1EG033806 | Chr8PR-7.1  |
| Chr8 | 268993   | 272502   | PR-7  | Thecc1EG033809 | Chr8PR-7.1  |
| Chr8 | 274222   | 277466   | PR-7  | Thecc1EG033810 | Chr8PR-7.1  |
| Chr8 | 962742   | 964086   | PR-5  | Thecc1EG033984 |             |
| Chr8 | 1137539  | 1140373  | PR-2  | Thecc1EG034024 |             |
| Chr8 | 1353624  | 1354652  | PR-12 | Thecc1EG034086 |             |
| Chr8 | 1493708  | 1495530  | PR-9  | Thecc1EG034114 |             |
| Chr8 | 2075283  | 2077743  | PR-5  | Thecc1EG034243 | Chr8PR-5.2  |
| Chr8 | 2087537  | 2090040  | PR-5  | Thecc1EG034245 | Chr8PR-5.2  |
| Chr8 | 2224839  | 2229219  | PR-7  | Thecc1EG034269 |             |
| Chr8 | 2260133  | 2262131  | PR-9  | Thecc1EG034278 |             |

|      |          |          |       |                |             |
|------|----------|----------|-------|----------------|-------------|
| Chr8 | 2897102  | 2899238  | PR-2  | Thecc1EG034422 |             |
| Chr8 | 4575941  | 4579741  | PR-7  | Thecc1EG034736 |             |
| Chr8 | 5988115  | 5995353  | PR-2  | Thecc1EG035012 |             |
| Chr8 | 6226812  | 6229286  | PR-5  | Thecc1EG035053 |             |
| Chr8 | 8855786  | 8857516  | PR-9  | Thecc1EG035423 |             |
| Chr8 | 11449195 | 11452325 | PR-9  | Thecc1EG035691 |             |
|      |          |          |       |                |             |
| Chr9 | 134564   | 137947   | PR-2  | Thecc1EG036758 |             |
| Chr9 | 367926   | 369673   | PR-9  | Thecc1EG036816 |             |
| Chr9 | 410586   | 411381   | PR-1  | Thecc1EG036825 |             |
| Chr9 | 645825   | 649597   | PR-9  | Thecc1EG036873 |             |
| Chr9 | 938748   | 944094   | PR-11 | Thecc1EG036927 |             |
| Chr9 | 1738958  | 1741618  | PR-11 | Thecc1EG037102 | Chr9PR-11.1 |
| Chr9 | 1742221  | 1746075  | PR-11 | Thecc1EG037103 | Chr9PR-11.1 |
| Chr9 | 1747571  | 1752188  | PR-11 | Thecc1EG037104 | Chr9PR-11.1 |
| Chr9 | 1752241  | 1753840  | PR-11 | Thecc1EG037105 | Chr9PR-11.1 |
| Chr9 | 1754711  | 1759539  | PR-11 | Thecc1EG037107 | Chr9PR-11.1 |
| Chr9 | 1759531  | 1764203  | PR-11 | Thecc1EG037108 | Chr9PR-11.1 |
| Chr9 | 1764238  | 1769028  | PR-11 | Thecc1EG037109 | Chr9PR-11.1 |
| Chr9 | 1777647  | 1779310  | PR-11 | Thecc1EG037111 | Chr9PR-11.1 |
| Chr9 | 1779359  | 1781333  | PR-11 | Thecc1EG037112 | Chr9PR-11.1 |
| Chr9 | 3436551  | 3439194  | PR-2  | Thecc1EG037436 |             |
| Chr9 | 3902544  | 3906668  | PR-7  | Thecc1EG037518 |             |
| Chr9 | 4052575  | 4055968  | PR-16 | Thecc1EG037546 |             |
| Chr9 | 5158780  | 5163277  | PR-2  | Thecc1EG037759 |             |
| Chr9 | 6109289  | 6112057  | PR-2  | Thecc1EG037934 |             |
| Chr9 | 6851364  | 6854612  | PR-9  | Thecc1EG038079 |             |
| Chr9 | 7063382  | 7068716  | PR-2  | Thecc1EG038109 |             |
| Chr9 | 8686397  | 8690185  | PR-2  | Thecc1EG038357 |             |
| Chr9 | 13637086 | 13637886 | PR-1  | Thecc1EG038872 | Chr9PR-1.2  |
| Chr9 | 13639036 | 13639762 | PR-1  | Thecc1EG038873 | Chr9PR-1.2  |
| Chr9 | 14374415 | 14377545 | PR-7  | Thecc1EG038960 |             |
| Chr9 | 17902573 | 17905378 | PR-9  | Thecc1EG039289 |             |
| Chr9 | 19150129 | 19161776 | PR-7  | Thecc1EG039425 |             |
| Chr9 | 21602646 | 21603582 | PR-16 | Thecc1EG039645 | Chr9PR-16.3 |
| Chr9 | 21604434 | 21605321 | PR-16 | Thecc1EG039646 | Chr9PR-16.3 |
| Chr9 | 23054779 | 23063810 | PR-2  | Thecc1EG039796 |             |
| Chr9 | 24055817 | 24067197 | PR-7  | Thecc1EG039861 |             |
| Chr9 | 26281573 | 26290591 | PR-2  | Thecc1EG040040 |             |
| Chr9 | 28867512 | 28878972 | PR-9  | Thecc1EG040312 | Chr9PR-9.4  |
| Chr9 | 28900323 | 28913650 | PR-9  | Thecc1EG040315 | Chr9PR-9.4  |
| Chr9 | 28942562 | 28944397 | PR-9  | Thecc1EG040320 | Chr9PR-9.4  |
| Chr9 | 28981897 | 28983607 | PR-9  | Thecc1EG040327 | Chr9PR-9.4  |

|       |          |          |       |                |              |
|-------|----------|----------|-------|----------------|--------------|
| Chr9  | 29003771 | 29005794 | PR-9  | Thecc1EG040331 | Chr9PR-9.4   |
| Chr9  | 33307006 | 33308832 | PR-2  | Thecc1EG040768 |              |
| Chr9  | 33390249 | 33392278 | PR-2  | Thecc1EG040785 | Chr9PR-2.5   |
| Chr9  | 33393078 | 33395318 | PR-2  | Thecc1EG040786 | Chr9PR-2.5   |
| Chr9  | 33416912 | 33419009 | PR-2  | Thecc1EG040791 | Chr9PR-2.5   |
| Chr9  | 37324293 | 37326613 | PR-16 | Thecc1EG041376 | Chr9PR-16.6  |
| Chr9  | 37328816 | 37330133 | PR-16 | Thecc1EG041377 | Chr9PR-16.6  |
| Chr9  | 37330732 | 37332369 | PR-9  | Thecc1EG041378 |              |
| Chr9  | 37442073 | 37446700 | PR-2  | Thecc1EG041403 |              |
| Chr9  | 37711045 | 37715553 | PR-7  | Thecc1EG041449 |              |
| Chr9  | 37801525 | 37807811 | PR-7  | Thecc1EG041462 | Chr9PR-7.7   |
| Chr9  | 37811034 | 37827825 | PR-7  | Thecc1EG041463 | Chr9PR-7.7   |
| Chr9  | 39742134 | 39745187 | PR-2  | Thecc1EG041833 |              |
| Chr9  | 39900122 | 39901490 | PR-5  | Thecc1EG041871 |              |
| Chr9  | 40283527 | 40292405 | PR-7  | Thecc1EG041950 | Chr9PR-7.8   |
| Chr9  | 40287674 | 40292567 | PR-7  | Thecc1EG041951 | Chr9PR-7.8   |
| Chr9  | 40292614 | 40309871 | PR-7  | Thecc1EG041952 | Chr9PR-7.8   |
| Chr9  | 40299619 | 40329996 | PR-7  | Thecc1EG041957 | Chr9PR-7.8   |
| Chr9  | 41528294 | 41531544 | PR-2  | Thecc1EG042208 |              |
| Chr9  | 41718285 | 41727412 | PR-9  | Thecc1EG042259 | Chr9PR-9.9   |
| Chr9  | 41732924 | 41738678 | PR-9  | Thecc1EG042261 | Chr9PR-9.9   |
| Chr9  | 41826527 | 41827275 | PR-14 | Thecc1EG042284 | Chr9PR-14.10 |
| Chr9  | 41828203 | 41828948 | PR-14 | Thecc1EG042285 | Chr9PR-14.10 |
|       |          |          |       |                |              |
| Chr10 | 568906   | 571643   | PR-1  | Thecc1EG042446 |              |
| Chr10 | 1425026  | 1428017  | PR-2  | Thecc1EG042611 |              |
| Chr10 | 1611248  | 1619758  | PR-7  | Thecc1EG042652 | Chr10PR-7.1  |
| Chr10 | 1620365  | 1624378  | PR-7  | Thecc1EG042653 | Chr10PR-7.1  |
| Chr10 | 1625325  | 1628768  | PR-7  | Thecc1EG046952 | Chr10PR-7.1  |
| Chr10 | 1629514  | 1632741  | PR-7  | Thecc1EG046953 | Chr10PR-7.1  |
| Chr10 | 1644748  | 1652068  | PR-7  | Thecc1EG042656 | Chr10PR-7.1  |
| Chr10 | 1645533  | 1660966  | PR-7  | Thecc1EG042657 | Chr10PR-7.1  |
| Chr10 | 1660065  | 1667653  | PR-7  | Thecc1EG042659 | Chr10PR-7.1  |
| Chr10 | 1663592  | 1667693  | PR-7  | Thecc1EG042660 | Chr10PR-7.1  |
| Chr10 | 1982315  | 1983905  | PR-5  | Thecc1EG042726 |              |
| Chr10 | 2192233  | 2194119  | PR-2  | Thecc1EG042768 |              |
| Chr10 | 4550730  | 4551474  | PR-6  | Thecc1EG043194 | Chr10PR-6.2  |
| Chr10 | 4559293  | 4559803  | PR-6  | Thecc1EG043196 | Chr10PR-6.2  |
| Chr10 | 4561388  | 4562015  | PR-6  | Thecc1EG046959 | Chr10PR-6.2  |
| Chr10 | 4565525  | 4580115  | PR-6  | Thecc1EG043198 | Chr10PR-6.2  |
| Chr10 | 4565536  | 4566082  | PR-6  | Thecc1EG046960 | Chr10PR-6.2  |
| Chr10 | 4576505  | 4577038  | PR-6  | Thecc1EG043201 | Chr10PR-6.2  |



|          |          |          |       |                |             |
|----------|----------|----------|-------|----------------|-------------|
| Chr10    | 4582260  | 4582744  | PR-6  | Thecc1EG043202 | Chr10PR-6.2 |
| Chr10    | 5101255  | 5110883  | PR-17 | Thecc1EG043303 |             |
| Chr10    | 10866300 | 10867951 | PR-4  | Thecc1EG043895 |             |
| Chr10    | 15211018 | 15211919 | PR-16 | Thecc1EG044263 |             |
| Chr10    | 21995785 | 21996731 | PR-10 | Thecc1EG045046 |             |
| Chr10    | 23553698 | 23580519 | PR-8  | Thecc1EG045276 | Chr10PR-8.3 |
| Chr10    | 23602812 | 23603970 | PR-8  | Thecc1EG045283 | Chr10PR-8.3 |
| Chr10    | 24429996 | 24431594 | PR-9  | Thecc1EG045424 | Chr10PR-9.4 |
| Chr10    | 24431808 | 24447232 | PR-9  | Thecc1EG045425 | Chr10PR-9.4 |
| Chr10    | 24447255 | 24449409 | PR-9  | Thecc1EG045429 | Chr10PR-9.4 |
| Chr10    | 24507368 | 24509439 | PR-9  | Thecc1EG045437 | Chr10PR-9.4 |
| Chr10    | 25002097 | 25003389 | PR-14 | Thecc1EG045525 |             |
|          |          |          |       |                |             |
| Unmapped |          |          | PR-10 | Thecc1EG046315 |             |
| Unmapped |          |          | PR-10 | Thecc1EG046316 |             |
| Unmapped |          |          | PR-16 | Thecc1EG045749 |             |
| Unmapped |          |          | PR-5  | Thecc1EG046303 |             |
