# Supplementary material for: Theobroma cacao L. pathogenesis-related gene tandem array members show diverse expression dynamics in response to pathogen colonization
Source: PubMed Central journal article supplement (PMC4869279; doi:10.1186/s12864-016-2693-3), 2016-05-17
Supplement: 12864_2016_2693_MOESM4_ESM.pdf [file 12864_2016_2693_MOESM4_ESM.pdf]

| <b>Supplemental Table S4 - Gene IDs and BLASTp E-value for Arabidopsis PR genes</b> |                |                |
|-------------------------------------------------------------------------------------|----------------|----------------|
| <b>PR Gene Family</b>                                                               | <b>Gene ID</b> | <b>E-value</b> |
| PR-1                                                                                | AT2G14580      | 1.00E-62       |
| PR-1                                                                                | AT3G19690      | 5.00E-61       |
| PR-1                                                                                | AT4G33720      | 3.00E-60       |
| PR-1                                                                                | AT2G14610      | 3.00E-58       |
| PR-1                                                                                | AT1G50060      | 1.00E-55       |
| PR-1                                                                                | AT5G26130      | 9.00E-52       |
| PR-1                                                                                | AT4G33710      | 9.00E-51       |
| PR-1                                                                                | AT4G33730      | 3.00E-50       |
| PR-1                                                                                | AT4G25790      | 7.00E-50       |
| PR-1                                                                                | AT2G19990      | 4.00E-48       |
| PR-1                                                                                | AT5G57625      | 3.00E-47       |
| PR-1                                                                                | AT1G01310      | 1.00E-44       |
| PR-1                                                                                | AT1G50050      | 1.00E-43       |
| PR-1                                                                                | AT4G30320      | 6.00E-43       |
| PR-1                                                                                | AT4G25780      | 2.00E-42       |
| PR-1                                                                                | AT3G09590      | 2.00E-42       |
| PR-1                                                                                | AT4G31470      | 3.00E-40       |
| PR-1                                                                                | AT5G02730      | 2.00E-39       |
| PR-1                                                                                | AT4G07820      | 4.00E-37       |
| PR-1                                                                                | AT5G66590      | 1.00E-29       |
| PR-1                                                                                | AT2G19970      | 2.00E-25       |
| PR-1                                                                                | AT2G19980      | 2.00E-20       |
| PR-2                                                                                | AT4G16260      | 5.00E-116      |
| PR-2                                                                                | AT3G57260      | 3.00E-103      |
| PR-2                                                                                | AT3G57270      | 6.00E-99       |
| PR-2                                                                                | AT3G57240      | 7.00E-97       |
| PR-2                                                                                | AT5G56590      | 7.00E-74       |
| PR-2                                                                                | AT2G26600      | 8.00E-70       |
| PR-2                                                                                | AT5G42720      | 5.00E-69       |
| PR-2                                                                                | AT4G29360      | 1.00E-68       |
| PR-2                                                                                | AT5G20330      | 5.00E-67       |
| PR-2                                                                                | AT5G20390      | 7.00E-67       |
| PR-2                                                                                | AT1G32860      | 4.00E-65       |

|      |           |          |
|------|-----------|----------|
| PR-2 | AT5G20340 | 4.00E-65 |
| PR-2 | AT1G33220 | 9.00E-65 |
| PR-2 | AT3G15800 | 2.00E-63 |
| PR-2 | AT2G05790 | 3.00E-63 |
| PR-2 | AT2G01630 | 1.00E-62 |
| PR-2 | AT2G16230 | 2.00E-62 |
| PR-2 | AT4G26830 | 3.00E-62 |
| PR-2 | AT2G27500 | 6.00E-62 |
| PR-2 | AT5G24318 | 1.00E-61 |
| PR-2 | AT5G55180 | 2.00E-61 |
| PR-2 | AT4G18340 | 4.00E-61 |
| PR-2 | AT1G66250 | 2.00E-60 |
| PR-2 | AT1G30080 | 1.00E-59 |
| PR-2 | AT5G42100 | 1.00E-59 |
| PR-2 | AT4G34480 | 3.00E-58 |
| PR-2 | AT1G77790 | 5.00E-58 |
| PR-2 | AT5G20560 | 4.00E-57 |
| PR-2 | AT1G11820 | 3.00E-55 |
| PR-2 | AT1G77780 | 2.00E-54 |
| PR-2 | AT3G07320 | 2.00E-54 |
| PR-2 | AT4G14080 | 3.00E-53 |
| PR-2 | AT5G58090 | 2.00E-52 |
| PR-2 | AT3G13560 | 4.00E-52 |
| PR-2 | AT3G61810 | 3.00E-51 |
| PR-2 | AT5G18220 | 4.00E-50 |
| PR-2 | AT3G46570 | 5.00E-50 |
| PR-2 | AT3G23770 | 1.00E-49 |
| PR-2 | AT4G31140 | 9.00E-49 |
| PR-2 | AT3G24330 | 9.00E-49 |
| PR-2 | AT3G04010 | 4.00E-48 |
| PR-2 | AT5G58480 | 1.00E-46 |
| PR-2 | AT3G55430 | 1.00E-44 |
| PR-2 | AT1G64760 | 2.00E-44 |
| PR-2 | AT2G19440 | 2.00E-43 |
| PR-2 | AT5G64790 | 3.00E-43 |
| PR-2 | AT2G39640 | 3.00E-42 |

|      |           |          |
|------|-----------|----------|
| PR-2 | AT4G17180 | 3.00E-42 |
| PR-2 | AT5G20870 | 8.00E-39 |
| PR-2 | AT3G55780 | 2.00E-34 |
| PR-3 | AT3G12500 | 3.00E-86 |
| PR-3 | AT1G02360 | 2.00E-64 |
| PR-3 | AT4G01700 | 1.00E-61 |
| PR-3 | AT2G43570 | 2.00E-33 |
| PR-3 | AT1G05850 | 3.00E-32 |
| PR-3 | AT2G43590 | 2.00E-31 |
| PR-3 | AT3G54420 | 1.00E-30 |
| PR-3 | AT3G16920 | 2.00E-30 |
| PR-3 | AT2G43610 | 2.00E-29 |
| PR-3 | AT2G43620 | 1.00E-27 |
| PR-3 | AT2G43580 | 2.00E-27 |
| PR-3 | AT1G56680 | 2.00E-22 |
| PR-3 | AT2G43600 | 4.00E-22 |
| PR-3 | AT3G47540 | 1.00E-19 |
| PR-4 | AT3G04720 | 1.00E-60 |
| PR-5 | AT1G75030 | 7.00E-87 |
| PR-5 | AT1G18250 | 1.00E-86 |
| PR-5 | AT1G73620 | 3.00E-86 |
| PR-5 | AT1G75050 | 6.00E-85 |
| PR-5 | AT1G19320 | 2.00E-83 |
| PR-5 | AT4G38660 | 3.00E-83 |
| PR-5 | AT1G75040 | 5.00E-81 |
| PR-5 | AT1G77700 | 3.00E-78 |
| PR-5 | AT1G20030 | 6.00E-78 |
| PR-5 | AT4G36010 | 3.00E-77 |
| PR-5 | AT4G24180 | 5.00E-77 |
| PR-5 | AT1G75800 | 5.00E-77 |
| PR-5 | AT2G17860 | 5.00E-75 |
| PR-5 | AT5G24620 | 4.00E-71 |
| PR-5 | AT5G02140 | 1.00E-65 |
| PR-5 | AT4G38670 | 9.00E-65 |
| PR-5 | AT5G40020 | 2.00E-63 |
| PR-5 | AT5G38280 | 6.00E-59 |
| PR-5 | AT2G28790 | 1.00E-54 |
| PR-5 | AT4G36000 | 1.00E-51 |
| PR-5 | AT4G11650 | 6.00E-51 |
| PR-5 | AT4G18250 | 1.00E-43 |
| PR-5 | AT1G70250 | 6.00E-42 |

|      |           |           |
|------|-----------|-----------|
| PR-5 | AT2G24810 | 6.00E-27  |
| PR-6 | AT2G38870 | 5.00E-17  |
| PR-6 | AT2G38900 | 2.00E-14  |
| PR-6 | AT5G43580 | 8.00E-14  |
| PR-6 | AT5G43570 | 6.00E-07  |
| PR-6 | AT3G46860 | 1.00E-06  |
| PR-7 | AT5G67360 | 7.00E-160 |
| PR-7 | AT2G05920 | 3.00E-158 |
| PR-7 | AT1G04110 | 6.00E-158 |
| PR-7 | AT4G34980 | 1.00E-156 |
| PR-7 | AT3G14067 | 2.00E-154 |
| PR-7 | AT1G01900 | 8.00E-149 |
| PR-7 | AT3G14240 | 5.00E-148 |
| PR-7 | AT5G51750 | 1.00E-142 |
| PR-7 | AT2G04160 | 8.00E-140 |
| PR-7 | AT5G59810 | 1.00E-130 |
| PR-7 | AT4G00230 | 3.00E-129 |
| PR-7 | AT1G20160 | 2.00E-124 |
| PR-7 | AT5G59120 | 4.00E-123 |
| PR-7 | AT5G45650 | 8.00E-119 |
| PR-7 | AT5G59100 | 3.00E-116 |
| PR-7 | AT5G67090 | 6.00E-116 |
| PR-7 | AT5G59090 | 2.00E-115 |
| PR-7 | AT5G03620 | 4.00E-114 |
| PR-7 | AT5G59190 | 4.00E-113 |
| PR-7 | AT3G46850 | 3.00E-110 |
| PR-7 | AT3G46840 | 1.00E-108 |
| PR-7 | AT4G10520 | 1.00E-106 |
| PR-7 | AT4G10550 | 2.00E-105 |
| PR-7 | AT1G20150 | 5.00E-105 |
| PR-7 | AT4G10540 | 2.00E-104 |
| PR-7 | AT1G32950 | 5.00E-103 |
| PR-7 | AT1G66210 | 5.00E-103 |
| PR-7 | AT5G58830 | 1.00E-102 |
| PR-7 | AT5G59130 | 2.00E-102 |
| PR-7 | AT4G10510 | 6.00E-102 |
| PR-7 | AT1G32960 | 5.00E-100 |
| PR-7 | AT1G32940 | 8.00E-98  |
| PR-7 | AT1G66220 | 1.00E-97  |
| PR-7 | AT5G58820 | 2.00E-97  |
| PR-7 | AT4G26330 | 2.00E-95  |

|      |           |           |
|------|-----------|-----------|
| PR-7 | AT4G21650 | 4.00E-95  |
| PR-7 | AT4G21630 | 6.00E-95  |
| PR-7 | AT5G45640 | 1.00E-92  |
| PR-7 | AT4G10530 | 2.00E-92  |
| PR-7 | AT5G11940 | 2.00E-91  |
| PR-7 | AT4G21323 | 1.00E-89  |
| PR-7 | AT4G15040 | 3.00E-89  |
| PR-7 | AT4G21326 | 1.00E-83  |
| PR-7 | AT1G32970 | 5.00E-79  |
| PR-7 | AT4G30020 | 1.00E-77  |
| PR-7 | AT2G19170 | 3.00E-77  |
| PR-7 | AT4G20430 | 7.00E-71  |
| PR-7 | AT5G44530 | 7.00E-71  |
| PR-7 | AT1G30600 | 5.00E-70  |
| PR-7 | AT1G62340 | 2.00E-63  |
| PR-8 | AT5G24090 | 3.00E-100 |
| PR-9 | AT5G06720 | 8.00E-147 |
| PR-9 | AT5G06730 | 4.00E-145 |
| PR-9 | AT5G19880 | 2.00E-123 |
| PR-9 | AT3G32980 | 8.00E-106 |
| PR-9 | AT2G38380 | 8.00E-105 |
| PR-9 | AT3G49120 | 2.00E-104 |
| PR-9 | AT3G49110 | 2.00E-104 |
| PR-9 | AT2G18150 | 7.00E-104 |
| PR-9 | AT2G18140 | 2.00E-103 |
| PR-9 | AT5G19890 | 5.00E-103 |
| PR-9 | AT4G08770 | 6.00E-103 |
| PR-9 | AT4G08780 | 1.00E-101 |
| PR-9 | AT3G50990 | 1.00E-101 |
| PR-9 | AT4G36430 | 5.00E-101 |
| PR-9 | AT2G38390 | 9.00E-101 |
| PR-9 | AT5G66390 | 8.00E-98  |
| PR-9 | AT5G05340 | 2.00E-93  |
| PR-9 | AT1G44970 | 2.00E-88  |
| PR-9 | AT1G14550 | 4.00E-87  |
| PR-9 | AT1G49570 | 1.00E-86  |
| PR-9 | AT5G58400 | 2.00E-85  |
| PR-9 | AT1G14540 | 1.00E-84  |
| PR-9 | AT5G58390 | 2.00E-83  |
| PR-9 | AT4G16270 | 1.00E-82  |
| PR-9 | AT4G11290 | 3.00E-81  |

|      |           |          |
|------|-----------|----------|
| PR-9 | AT2G35380 | 2.00E-80 |
| PR-9 | AT2G41480 | 5.00E-80 |
| PR-9 | AT1G68850 | 3.00E-79 |
| PR-9 | AT5G64120 | 3.00E-78 |
| PR-9 | AT3G01190 | 8.00E-78 |
| PR-9 | AT3G03670 | 1.00E-77 |
| PR-9 | AT5G39580 | 1.00E-77 |
| PR-9 | AT2G22420 | 5.00E-77 |
| PR-9 | AT5G17820 | 5.00E-77 |
| PR-9 | AT1G05260 | 1.00E-76 |
| PR-9 | AT5G15180 | 1.00E-76 |
| PR-9 | AT5G42180 | 2.00E-75 |
| PR-9 | AT3G21770 | 5.00E-75 |
| PR-9 | AT5G51890 | 1.00E-73 |
| PR-9 | AT4G33420 | 4.00E-73 |
| PR-9 | AT5G14130 | 2.00E-72 |
| PR-9 | AT2G18980 | 3.00E-70 |
| PR-9 | AT4G25980 | 5.00E-70 |
| PR-9 | AT1G30870 | 7.00E-70 |
| PR-9 | AT1G05250 | 3.00E-69 |
| PR-9 | AT1G05240 | 3.00E-69 |
| PR-9 | AT4G30170 | 2.00E-68 |
| PR-9 | AT1G71695 | 9.00E-68 |
| PR-9 | AT4G37530 | 2.00E-67 |
| PR-9 | AT5G67400 | 2.00E-67 |
| PR-9 | AT3G49960 | 3.00E-67 |
| PR-9 | AT5G24070 | 3.00E-67 |
| PR-9 | AT2G43480 | 6.00E-67 |
| PR-9 | AT1G77100 | 6.00E-66 |
| PR-9 | AT5G64110 | 6.00E-65 |
| PR-9 | AT2G34060 | 1.00E-64 |
| PR-9 | AT5G64100 | 3.00E-64 |
| PR-9 | AT2G39040 | 4.00E-64 |
| PR-9 | AT4G37520 | 4.00E-64 |
| PR-9 | AT4G17690 | 2.00E-63 |
| PR-9 | AT5G40150 | 4.00E-63 |
| PR-9 | AT2G24800 | 1.00E-61 |
| PR-9 | AT3G28200 | 1.00E-61 |
| PR-9 | AT4G33870 | 4.00E-61 |
| PR-9 | AT5G47000 | 2.00E-59 |
| PR-9 | AT4G26010 | 6.00E-59 |

|       |           |           |
|-------|-----------|-----------|
| PR-9  | AT4G31760 | 3.00E-56  |
| PR-9  | AT1G24110 | 3.00E-56  |
| PR-9  | AT2G37130 | 5.00E-54  |
| PR-9  | AT1G34510 | 5.00E-53  |
| PR-9  | AT4G21960 | 4.00E-52  |
| PR-9  | AT5G22410 | 8.00E-52  |
| PR-9  | AT3G17070 | 3.00E-51  |
| PR-9  | AT3G42570 | 2.00E-14  |
| PR-10 | AT1G24020 | 2.00E-07  |
| PR-11 | AT4G19810 | 7.00E-154 |
| PR-11 | AT4G19800 | 5.00E-120 |
| PR-11 | AT4G19820 | 1.00E-118 |
| PR-11 | AT4G19760 | 1.00E-108 |
| PR-11 | AT4G19720 | 9.00E-107 |
| PR-11 | AT4G19750 | 2.00E-105 |
| PR-11 | AT4G19730 | 2.00E-85  |
| PR-11 | AT4G19770 | 3.00E-76  |
| PR-11 | AT4G19740 | 6.00E-45  |
| PR-12 | AT2G26020 | 3.00E-34  |
| PR-12 | AT5G44420 | 7.00E-34  |
| PR-12 | AT2G26010 | 2.00E-33  |
| PR-12 | AT5G44430 | 3.00E-33  |
| PR-12 | AT1G75830 | 1.00E-32  |
| PR-12 | AT1G19610 | 2.00E-15  |
| PR-12 | AT1G55010 | 5.00E-13  |
| PR-13 | AT1G72260 | 2.00E-85  |
| PR-13 | AT1G66100 | 4.00E-35  |
| PR-13 | AT5G36910 | 5.00E-35  |
| PR-13 | AT2G15010 | 9.00E-22  |
| PR-14 | AT5G59310 | 5.00E-24  |
| PR-14 | AT5G59320 | 3.00E-19  |
| PR-14 | AT2G38540 | 3.00E-18  |
| PR-14 | AT2G18370 | 2.00E-16  |
| PR-14 | AT3G51590 | 4.00E-15  |
| PR-14 | AT3G08770 | 6.00E-15  |
| PR-14 | AT5G01870 | 8.00E-15  |
| PR-14 | AT3G51600 | 3.00E-14  |
| PR-14 | AT2G38530 | 4.00E-14  |
| PR-14 | AT2G15050 | 4.00E-13  |
| PR-14 | AT4G33355 | 8.00E-12  |

|       |           |           |
|-------|-----------|-----------|
| PR-14 | AT5G59330 | 8.00E-08  |
| PR-14 | AT2G15325 | 1.00E-06  |
| PR-16 | AT1G18980 | 5.00E-69  |
| PR-16 | AT1G18970 | 2.00E-68  |
| PR-16 | AT3G05950 | 7.00E-61  |
| PR-16 | AT3G04200 | 1.00E-60  |
| PR-16 | AT4G14630 | 7.00E-59  |
| PR-16 | AT5G39160 | 1.00E-57  |
| PR-16 | AT5G39130 | 2.00E-57  |
| PR-16 | AT5G39150 | 2.00E-57  |
| PR-16 | AT5G39190 | 2.00E-57  |
| PR-16 | AT5G39120 | 3.00E-57  |
| PR-16 | AT5G39110 | 4.00E-57  |
| PR-16 | AT5G39180 | 1.00E-56  |
| PR-16 | AT3G62020 | 4.00E-56  |
| PR-16 | AT5G38960 | 4.00E-56  |
| PR-16 | AT1G02335 | 2.00E-54  |
| PR-16 | AT1G09560 | 1.00E-53  |
| PR-16 | AT3G04190 | 3.00E-52  |
| PR-16 | AT5G38940 | 6.00E-52  |
| PR-16 | AT3G04170 | 8.00E-52  |
| PR-16 | AT3G05930 | 4.00E-51  |
| PR-16 | AT5G38930 | 7.00E-51  |
| PR-16 | AT3G04180 | 8.00E-50  |
| PR-16 | AT3G04150 | 6.00E-49  |
| PR-16 | AT5G26700 | 6.00E-46  |
| PR-16 | AT5G38910 | 1.00E-45  |
| PR-16 | AT1G74820 | 1.00E-43  |
| PR-16 | AT3G10080 | 4.00E-42  |
| PR-16 | AT1G10460 | 1.00E-39  |
| PR-16 | AT5G39100 | 1.00E-36  |
| PR-16 | AT1G72610 | 3.00E-36  |
| PR-16 | AT5G20630 | 2.00E-33  |
| PR-16 | AT5G61750 | 3.00E-30  |
| PR-16 | AT5G38950 | 2.00E-13  |
| PR-17 | AT2G15220 | 2.00E-101 |
| PR-17 | AT2G15130 | 9.00E-89  |
| PR-17 | AT2G15170 | 7.00E-12  |
