# Supplementary material for: Theobroma cacao L. pathogenesis-related gene tandem array members show diverse expression dynamics in response to pathogen colonization
Source: PubMed Central journal article supplement (PMC4869279; doi:10.1186/s12864-016-2693-3), 2016-05-17
Supplement: 12864_2016_2693_MOESM5_ESM.pdf [file 12864_2016_2693_MOESM5_ESM.pdf]

| <b>Supplemental Table S5 - Gene IDs and BLASTp E-value for <i>Brachypodium distachyon</i> PR genes</b> |                |                |
|--------------------------------------------------------------------------------------------------------|----------------|----------------|
| <b>PR Gene Family</b>                                                                                  | <b>Gene ID</b> | <b>E-value</b> |
| PR-1                                                                                                   | Bradi1g57580   | 6.00E-43       |
| PR-1                                                                                                   | Bradi1g57540   | 1.00E-39       |
| PR-1                                                                                                   | Bradi3g53630   | 2.00E-36       |
| PR-1                                                                                                   | Bradi1g12360   | 1.00E-35       |
| PR-1                                                                                                   | Bradi4g00865   | 5.00E-34       |
| PR-1                                                                                                   | Bradi1g57590   | 9.00E-34       |
| PR-1                                                                                                   | Bradi2g14240   | 7.00E-32       |
| PR-1                                                                                                   | Bradi3g53637   | 2.00E-27       |
| PR-1                                                                                                   | Bradi4g38910   | 4.00E-25       |
| PR-1                                                                                                   | Bradi3g60230   | 2.00E-23       |
| PR-1                                                                                                   | Bradi3g60260   | 4.00E-23       |
| PR-1                                                                                                   | Bradi1g09637   | 4.00E-22       |
| PR-1                                                                                                   | Bradi3g53681   | 7.00E-20       |
| PR-1                                                                                                   | Bradi1g57575   | 4.00E-19       |
| PR-1                                                                                                   | Bradi2g14255   | 3.00E-09       |
| PR-2                                                                                                   | Bradi2g43056   | 3.00E-77       |
| PR-2                                                                                                   | Bradi2g60536   | 1.00E-74       |
| PR-2                                                                                                   | Bradi2g60490   | 4.00E-73       |
| PR-2                                                                                                   | Bradi2g60441   | 1.00E-71       |
| PR-2                                                                                                   | Bradi2g27140   | 2.00E-69       |
| PR-2                                                                                                   | Bradi2g22222   | 1.00E-66       |
| PR-2                                                                                                   | Bradi2g60497   | 1.00E-66       |
| PR-2                                                                                                   | Bradi1g15295   | 1.00E-66       |
| PR-2                                                                                                   | Bradi2g60542   | 2.00E-66       |
| PR-2                                                                                                   | Bradi2g52566   | 2.00E-65       |
| PR-2                                                                                                   | Bradi2g60557   | 7.00E-65       |
| PR-2                                                                                                   | Bradi2g22226   | 1.00E-64       |
| PR-2                                                                                                   | Bradi2g21142   | 1.00E-63       |
| PR-2                                                                                                   | Bradi2g49330   | 2.00E-61       |
| PR-2                                                                                                   | Bradi2g22224   | 5.00E-60       |
| PR-2                                                                                                   | Bradi1g38755   | 6.00E-55       |
| PR-2                                                                                                   | Bradi1g68450   | 6.00E-55       |

|      |              |          |
|------|--------------|----------|
| PR-2 | Bradi5g09327 | 1.00E-54 |
| PR-2 | Bradi2g60534 | 3.00E-54 |
| PR-2 | Bradi3g44910 | 5.00E-54 |
| PR-2 | Bradi1g69610 | 9.00E-54 |
| PR-2 | Bradi4g36190 | 1.00E-53 |
| PR-2 | Bradi3g20770 | 4.00E-53 |
| PR-2 | Bradi1g12810 | 6.00E-52 |
| PR-2 | Bradi3g57610 | 8.00E-52 |
| PR-2 | Bradi2g60541 | 5.00E-51 |
| PR-2 | Bradi2g55690 | 6.00E-51 |
| PR-2 | Bradi3g07385 | 1.00E-50 |
| PR-2 | Bradi1g50080 | 2.00E-50 |
| PR-2 | Bradi2g23940 | 7.00E-50 |
| PR-2 | Bradi1g69020 | 9.00E-49 |
| PR-2 | Bradi1g25530 | 2.00E-48 |
| PR-2 | Bradi3g18220 | 3.00E-47 |
| PR-2 | Bradi1g10347 | 8.00E-47 |
| PR-2 | Bradi2g22228 | 1.00E-46 |
| PR-2 | Bradi1g36460 | 2.00E-46 |
| PR-2 | Bradi1g23640 | 2.00E-44 |
| PR-2 | Bradi1g53590 | 3.00E-44 |
| PR-2 | Bradi1g13232 | 7.00E-44 |
| PR-2 | Bradi1g56270 | 1.00E-42 |
| PR-2 | Bradi1g06050 | 1.00E-42 |
| PR-2 | Bradi4g09230 | 3.00E-42 |
| PR-2 | Bradi5g12137 | 5.00E-42 |
| PR-2 | Bradi4g34390 | 9.00E-42 |
| PR-2 | Bradi3g03520 | 1.00E-41 |
| PR-2 | Bradi1g25517 | 2.00E-41 |
| PR-2 | Bradi2g18420 | 4.00E-41 |
| PR-2 | Bradi4g15460 | 4.00E-41 |
| PR-2 | Bradi1g37160 | 2.00E-40 |
| PR-2 | Bradi3g40907 | 8.00E-39 |
| PR-2 | Bradi1g60410 | 2.00E-38 |
| PR-2 | Bradi2g18700 | 2.00E-37 |
| PR-2 | Bradi1g65197 | 2.00E-37 |

|      |              |          |
|------|--------------|----------|
| PR-2 | Bradi1g26510 | 2.00E-34 |
| PR-2 | Bradi3g33254 | 3.00E-34 |
| PR-2 | Bradi3g33277 | 3.00E-34 |
| PR-2 | Bradi5g26467 | 7.00E-33 |
| PR-2 | Bradi1g55203 | 1.00E-32 |
| PR-2 | Bradi1g61320 | 8.00E-10 |
| PR-3 | Bradi3g32340 | 4.00E-78 |
| PR-3 | Bradi2g47210 | 4.00E-70 |
| PR-3 | Bradi1g29887 | 3.00E-69 |
| PR-3 | Bradi1g29880 | 6.00E-67 |
| PR-3 | Bradi2g47191 | 7.00E-63 |
| PR-3 | Bradi2g26000 | 5.00E-57 |
| PR-3 | Bradi1g76217 | 8.00E-50 |
| PR-3 | Bradi2g11140 | 3.00E-48 |
| PR-3 | Bradi2g36780 | 6.00E-40 |
| PR-3 | Bradi3g40320 | 6.00E-32 |
| PR-3 | Bradi5g14430 | 2.00E-27 |
| PR-3 | Bradi4g34040 | 1.00E-26 |
| PR-3 | Bradi3g48230 | 2.00E-26 |
| PR-3 | Bradi2g26017 | 9.00E-23 |
| PR-4 | Bradi4g14930 | 2.00E-42 |
| PR-4 | Bradi4g14920 | 1.00E-41 |
| PR-5 | Bradi1g33540 | 2.00E-67 |
| PR-5 | Bradi4g34180 | 4.00E-62 |
| PR-5 | Bradi3g04330 | 2.00E-60 |
| PR-5 | Bradi3g42380 | 1.00E-59 |
| PR-5 | Bradi3g40596 | 4.00E-57 |
| PR-5 | Bradi1g68330 | 1.00E-56 |
| PR-5 | Bradi4g36410 | 3.00E-56 |
| PR-5 | Bradi1g69277 | 3.00E-55 |
| PR-5 | Bradi1g68340 | 5.00E-55 |
| PR-5 | Bradi4g36400 | 2.00E-54 |
| PR-5 | Bradi4g09130 | 3.00E-53 |
| PR-5 | Bradi4g03290 | 7.00E-52 |
| PR-5 | Bradi4g05430 | 1.00E-51 |
| PR-5 | Bradi1g30117 | 3.00E-51 |
| PR-5 | Bradi3g21100 | 2.00E-50 |
| PR-5 | Bradi5g27280 | 4.00E-49 |
| PR-5 | Bradi5g00550 | 1.00E-47 |
| PR-5 | Bradi4g05440 | 2.00E-44 |
| PR-5 | Bradi1g13060 | 8.00E-43 |

|      |              |           |
|------|--------------|-----------|
| PR-5 | Bradi2g54560 | 2.00E-41  |
| PR-5 | Bradi1g13070 | 6.00E-41  |
| PR-5 | Bradi2g01200 | 4.00E-40  |
| PR-5 | Bradi3g26630 | 2.00E-38  |
| PR-5 | Bradi2g01217 | 2.00E-37  |
| PR-5 | Bradi2g01227 | 1.00E-27  |
| PR-5 | Bradi3g07960 | 2.00E-22  |
| PR-5 | Bradi4g09220 | 3.00E-22  |
| PR-5 | Bradi4g04160 | 2.00E-15  |
| PR-5 | Bradi4g04150 | 4.00E-15  |
| PR-5 | Bradi4g03280 | 6.00E-15  |
| PR-5 | Bradi4g04180 | 2.00E-13  |
| PR-5 | Bradi4g03285 | 3.00E-09  |
| PR-5 | Bradi4g09370 | 1.00E-08  |
| PR-6 | Bradi2g35500 | 3.00E-09  |
| PR-6 | Bradi1g09487 | 5.00E-09  |
| PR-6 | Bradi1g46410 | 6.00E-09  |
| PR-6 | Bradi2g39290 | 5.00E-08  |
| PR-6 | Bradi3g36050 | 7.00E-08  |
| PR-6 | Bradi2g35540 | 1.00E-07  |
| PR-6 | Bradi4g40616 | 4.00E-07  |
| PR-6 | Bradi2g39271 | 5.00E-07  |
| PR-6 | Bradi2g39260 | 2.00E-06  |
| PR-6 | Bradi2g39280 | 2.00E-06  |
| PR-7 | Bradi5g18110 | 4.00E-163 |
| PR-7 | Bradi5g18117 | 6.00E-158 |
| PR-7 | Bradi5g24780 | 8.00E-157 |
| PR-7 | Bradi3g31690 | 1.00E-154 |
| PR-7 | Bradi1g77260 | 2.00E-154 |
| PR-7 | Bradi5g18130 | 1.00E-151 |
| PR-7 | Bradi5g24500 | 4.00E-151 |
| PR-7 | Bradi3g51070 | 4.00E-149 |
| PR-7 | Bradi3g19300 | 8.00E-146 |
| PR-7 | Bradi2g27640 | 2.00E-139 |
| PR-7 | Bradi1g75550 | 3.00E-138 |
| PR-7 | Bradi2g07730 | 4.00E-137 |
| PR-7 | Bradi3g19320 | 6.00E-137 |
| PR-7 | Bradi5g18100 | 1.00E-134 |
| PR-7 | Bradi4g11640 | 5.00E-132 |
| PR-7 | Bradi1g17320 | 1.00E-130 |
| PR-7 | Bradi1g07840 | 4.00E-130 |

|      |              |           |
|------|--------------|-----------|
| PR-7 | Bradi1g68270 | 5.00E-128 |
| PR-7 | Bradi5g18910 | 1.00E-126 |
| PR-7 | Bradi3g37457 | 7.00E-125 |
| PR-7 | Bradi1g14860 | 2.00E-124 |
| PR-7 | Bradi1g17330 | 6.00E-122 |
| PR-7 | Bradi4g31360 | 2.00E-120 |
| PR-7 | Bradi2g33990 | 2.00E-119 |
| PR-7 | Bradi5g00840 | 3.00E-119 |
| PR-7 | Bradi1g17350 | 2.00E-118 |
| PR-7 | Bradi4g33237 | 2.00E-117 |
| PR-7 | Bradi3g57140 | 9.00E-117 |
| PR-7 | Bradi4g41420 | 1.00E-116 |
| PR-7 | Bradi3g57130 | 2.00E-115 |
| PR-7 | Bradi2g24220 | 6.00E-115 |
| PR-7 | Bradi5g10210 | 8.00E-114 |
| PR-7 | Bradi2g48740 | 2.00E-113 |
| PR-7 | Bradi3g20580 | 7.00E-113 |
| PR-7 | Bradi4g24790 | 5.00E-112 |
| PR-7 | Bradi1g36242 | 8.00E-112 |
| PR-7 | Bradi3g07280 | 4.00E-109 |
| PR-7 | Bradi1g07700 | 7.00E-109 |
| PR-7 | Bradi2g56180 | 4.00E-107 |
| PR-7 | Bradi2g51440 | 1.00E-106 |
| PR-7 | Bradi4g36000 | 5.00E-104 |
| PR-7 | Bradi1g53630 | 2.00E-101 |
| PR-7 | Bradi1g54830 | 9.00E-97  |
| PR-7 | Bradi1g08451 | 1.00E-95  |
| PR-7 | Bradi3g04690 | 2.00E-91  |
| PR-7 | Bradi2g10727 | 1.00E-88  |
| PR-7 | Bradi3g10037 | 8.00E-87  |
| PR-7 | Bradi1g08670 | 1.00E-86  |
| PR-7 | Bradi1g74547 | 7.00E-85  |
| PR-7 | Bradi5g03190 | 1.00E-84  |
| PR-7 | Bradi5g03790 | 3.00E-82  |
| PR-7 | Bradi3g10058 | 1.00E-80  |
| PR-7 | Bradi5g23480 | 9.00E-79  |
| PR-7 | Bradi3g10030 | 1.00E-75  |
| PR-7 | Bradi2g51130 | 4.00E-73  |
| PR-7 | Bradi1g34087 | 7.00E-71  |
| PR-7 | Bradi5g03780 | 7.00E-67  |
| PR-7 | Bradi5g17320 | 1.00E-63  |

|      |              |          |
|------|--------------|----------|
| PR-7 | Bradi3g04674 | 1.00E-41 |
| PR-7 | Bradi3g10044 | 4.00E-35 |
| PR-8 | Bradi1g52625 | 1.00E-83 |
| PR-8 | Bradi2g55630 | 7.00E-83 |
| PR-8 | Bradi2g55620 | 6.00E-81 |
| PR-8 | Bradi2g55610 | 9.00E-81 |
| PR-8 | Bradi2g45610 | 1.00E-71 |
| PR-8 | Bradi2g47067 | 7.00E-70 |
| PR-8 | Bradi2g47171 | 4.00E-67 |
| PR-8 | Bradi2g43755 | 7.00E-66 |
| PR-8 | Bradi4g40120 | 4.00E-38 |
| PR-8 | Bradi4g40110 | 5.00E-37 |
| PR-8 | Bradi2g47196 | 4.00E-34 |
| PR-8 | Bradi4g09417 | 7.00E-32 |
| PR-8 | Bradi4g09430 | 9.00E-30 |
| PR-8 | Bradi4g07560 | 8.00E-23 |
| PR-9 | Bradi1g68900 | 7.00E-87 |
| PR-9 | Bradi1g27920 | 1.00E-81 |
| PR-9 | Bradi2g40590 | 4.00E-81 |
| PR-9 | Bradi5g10070 | 8.00E-81 |
| PR-9 | Bradi1g68927 | 2.00E-80 |
| PR-9 | Bradi4g25660 | 5.00E-80 |
| PR-9 | Bradi1g68887 | 1.00E-79 |
| PR-9 | Bradi2g09660 | 9.00E-77 |
| PR-9 | Bradi2g09690 | 1.00E-76 |
| PR-9 | Bradi4g05230 | 1.00E-76 |
| PR-9 | Bradi4g44530 | 2.00E-76 |
| PR-9 | Bradi3g09080 | 2.00E-75 |
| PR-9 | Bradi1g38297 | 4.00E-75 |
| PR-9 | Bradi1g57247 | 6.00E-75 |
| PR-9 | Bradi1g38290 | 7.00E-75 |
| PR-9 | Bradi2g09680 | 1.00E-74 |
| PR-9 | Bradi1g38310 | 4.00E-74 |
| PR-9 | Bradi3g09087 | 8.00E-74 |
| PR-9 | Bradi2g09650 | 3.00E-73 |
| PR-9 | Bradi1g17860 | 3.00E-73 |
| PR-9 | Bradi1g63060 | 5.00E-73 |
| PR-9 | Bradi1g27910 | 1.00E-72 |
| PR-9 | Bradi1g17877 | 6.00E-72 |
| PR-9 | Bradi4g05190 | 1.00E-71 |
| PR-9 | Bradi3g09140 | 3.00E-71 |

|      |              |          |
|------|--------------|----------|
| PR-9 | Bradi1g17870 | 4.00E-71 |
| PR-9 | Bradi5g24200 | 7.00E-71 |
| PR-9 | Bradi1g43680 | 5.00E-70 |
| PR-9 | Bradi3g09120 | 6.00E-70 |
| PR-9 | Bradi3g09100 | 1.00E-69 |
| PR-9 | Bradi4g44510 | 2.00E-69 |
| PR-9 | Bradi1g41115 | 5.00E-69 |
| PR-9 | Bradi1g38350 | 6.00E-68 |
| PR-9 | Bradi4g32800 | 6.00E-68 |
| PR-9 | Bradi3g09130 | 6.00E-68 |
| PR-9 | Bradi3g20130 | 8.00E-68 |
| PR-9 | Bradi1g39190 | 6.00E-67 |
| PR-9 | Bradi1g17840 | 5.00E-66 |
| PR-9 | Bradi1g17790 | 2.00E-65 |
| PR-9 | Bradi4g32810 | 2.00E-65 |
| PR-9 | Bradi2g04490 | 6.00E-65 |
| PR-9 | Bradi5g19857 | 1.00E-64 |
| PR-9 | Bradi1g63067 | 2.00E-64 |
| PR-9 | Bradi1g42900 | 2.00E-64 |
| PR-9 | Bradi2g20830 | 3.00E-64 |
| PR-9 | Bradi2g20850 | 7.00E-64 |
| PR-9 | Bradi2g06497 | 2.00E-63 |
| PR-9 | Bradi2g20840 | 4.00E-63 |
| PR-9 | Bradi2g12228 | 1.00E-62 |
| PR-9 | Bradi2g34717 | 5.00E-62 |
| PR-9 | Bradi1g17850 | 9.00E-62 |
| PR-9 | Bradi3g33940 | 7.00E-61 |
| PR-9 | Bradi1g77140 | 2.00E-59 |
| PR-9 | Bradi3g41340 | 2.00E-59 |
| PR-9 | Bradi2g37010 | 3.00E-59 |
| PR-9 | Bradi2g37020 | 5.00E-59 |
| PR-9 | Bradi4g27680 | 5.00E-59 |
| PR-9 | Bradi2g13190 | 6.00E-59 |
| PR-9 | Bradi1g15600 | 6.00E-59 |
| PR-9 | Bradi3g13590 | 7.00E-59 |
| PR-9 | Bradi2g46050 | 2.00E-58 |
| PR-9 | Bradi2g09600 | 2.00E-58 |
| PR-9 | Bradi3g60880 | 2.00E-58 |
| PR-9 | Bradi3g59660 | 3.00E-58 |
| PR-9 | Bradi1g59537 | 2.00E-57 |
| PR-9 | Bradi1g44800 | 5.00E-57 |

|      |              |          |
|------|--------------|----------|
| PR-9 | Bradi3g32130 | 1.00E-56 |
| PR-9 | Bradi2g11307 | 5.00E-56 |
| PR-9 | Bradi5g27687 | 5.00E-56 |
| PR-9 | Bradi1g44790 | 6.00E-56 |
| PR-9 | Bradi1g07790 | 1.00E-54 |
| PR-9 | Bradi1g59550 | 2.00E-54 |
| PR-9 | Bradi2g52077 | 3.00E-54 |
| PR-9 | Bradi3g04717 | 6.00E-54 |
| PR-9 | Bradi2g12180 | 8.00E-54 |
| PR-9 | Bradi2g10150 | 8.00E-54 |
| PR-9 | Bradi2g12192 | 1.00E-53 |
| PR-9 | Bradi2g48050 | 1.00E-53 |
| PR-9 | Bradi2g12204 | 1.00E-53 |
| PR-9 | Bradi1g59520 | 1.00E-53 |
| PR-9 | Bradi5g27130 | 1.00E-53 |
| PR-9 | Bradi2g12170 | 2.00E-53 |
| PR-9 | Bradi5g14650 | 2.00E-53 |
| PR-9 | Bradi5g22650 | 1.00E-52 |
| PR-9 | Bradi3g33780 | 4.00E-52 |
| PR-9 | Bradi2g37000 | 5.00E-52 |
| PR-9 | Bradi5g12710 | 5.00E-52 |
| PR-9 | Bradi5g24650 | 7.00E-52 |
| PR-9 | Bradi1g77130 | 9.00E-52 |
| PR-9 | Bradi2g12216 | 5.00E-51 |
| PR-9 | Bradi1g58997 | 9.00E-51 |
| PR-9 | Bradi3g32110 | 1.00E-50 |
| PR-9 | Bradi2g20820 | 2.00E-50 |
| PR-9 | Bradi1g32870 | 2.00E-50 |
| PR-9 | Bradi1g33740 | 7.00E-50 |
| PR-9 | Bradi2g11300 | 1.00E-49 |
| PR-9 | Bradi5g27170 | 4.00E-49 |
| PR-9 | Bradi1g07780 | 1.00E-48 |
| PR-9 | Bradi1g74882 | 5.00E-48 |
| PR-9 | Bradi3g55850 | 7.00E-48 |
| PR-9 | Bradi1g26870 | 1.00E-47 |
| PR-9 | Bradi1g61550 | 1.00E-47 |
| PR-9 | Bradi5g27200 | 2.00E-47 |
| PR-9 | Bradi4g22660 | 3.00E-47 |
| PR-9 | Bradi4g40680 | 6.00E-47 |
| PR-9 | Bradi2g37040 | 9.00E-47 |
| PR-9 | Bradi2g11295 | 2.00E-46 |

|      |              |          |
|------|--------------|----------|
| PR-9 | Bradi1g61540 | 4.00E-46 |
| PR-9 | Bradi5g27150 | 3.00E-45 |
| PR-9 | Bradi4g05980 | 1.00E-44 |
| PR-9 | Bradi1g61530 | 2.00E-44 |
| PR-9 | Bradi2g17120 | 3.00E-44 |
| PR-9 | Bradi5g27160 | 3.00E-44 |
| PR-9 | Bradi1g20000 | 5.00E-44 |
| PR-9 | Bradi3g10470 | 5.00E-44 |
| PR-9 | Bradi1g41900 | 8.00E-44 |
| PR-9 | Bradi4g40190 | 3.00E-43 |
| PR-9 | Bradi1g20005 | 6.00E-43 |
| PR-9 | Bradi5g00690 | 8.00E-43 |
| PR-9 | Bradi3g10460 | 9.00E-43 |
| PR-9 | Bradi1g33730 | 1.00E-42 |
| PR-9 | Bradi3g29500 | 2.00E-42 |
| PR-9 | Bradi5g27220 | 3.00E-42 |
| PR-9 | Bradi5g27210 | 7.00E-42 |
| PR-9 | Bradi1g20020 | 2.00E-41 |
| PR-9 | Bradi2g38660 | 4.00E-41 |
| PR-9 | Bradi2g11320 | 6.00E-41 |
| PR-9 | Bradi1g19980 | 3.00E-40 |
| PR-9 | Bradi1g20026 | 9.00E-38 |
| PR-9 | Bradi1g20010 | 9.00E-37 |
| PR-9 | Bradi1g20032 | 3.00E-35 |
| PR-9 | Bradi1g19990 | 3.00E-34 |
| PR-9 | Bradi2g37060 | 3.00E-32 |
| PR-9 | Bradi2g37067 | 2.00E-30 |
| PR-9 | Bradi2g37047 | 2.00E-29 |
| PR-9 | Bradi2g38690 | 1.00E-24 |
| PR-9 | Bradi2g38670 | 1.00E-24 |
| PR-9 | Bradi2g37080 | 1.00E-21 |
| PR-9 | Bradi2g38680 | 2.00E-21 |
| PR-9 | Bradi1g26215 | 2.00E-21 |
| PR-9 | Bradi2g38685 | 3.00E-20 |
| PR-9 | Bradi2g38720 | 1.00E-19 |
| PR-9 | Bradi2g37090 | 1.00E-19 |
| PR-9 | Bradi2g38700 | 1.00E-18 |
| PR-9 | Bradi3g45700 | 7.00E-14 |
| PR-9 | Bradi4g41180 | 2.00E-12 |
| PR-9 | Bradi5g10490 | 4.00E-12 |
| PR-9 | Bradi3g40330 | 1.00E-11 |

|          |              |           |
|----------|--------------|-----------|
| PR-9     | Bradi4g25650 | 2.00E-10  |
| PR-10    | Bradi1g64920 | 5.00E-16  |
| PR-10    | Bradi1g64910 | 1.00E-15  |
| PR-10    | Bradi1g64890 | 2.00E-09  |
| PR-10    | Bradi3g48400 | 1.00E-08  |
| PR-10    | Bradi1g64880 | 2.00E-07  |
| PR-10    | Bradi4g05040 | 4.00E-06  |
| PR-11    | Bradi5g07230 | 2.00E-31  |
| PR-13    | Bradi1g57337 | 2.00E-08  |
| PR-13    | Bradi1g57302 | 1.00E-06  |
| PR-13    | Bradi1g57400 | 2.00E-06  |
| PR-14    | Bradi4g44410 | 5.00E-20  |
| PR-14    | Bradi1g21870 | 1.00E-17  |
| PR-14    | Bradi4g25750 | 2.00E-17  |
| PR-14    | Bradi4g44400 | 1.00E-15  |
| PR-14    | Bradi1g39120 | 4.00E-14  |
| PR-14    | Bradi2g53570 | 1.00E-11  |
| PR-14    | Bradi2g22284 | 8.00E-11  |
| PR-14    | Bradi2g07140 | 5.00E-10  |
| PR-14    | Bradi2g22278 | 8.00E-08  |
| PR-15/16 | Bradi1g11920 | 1.00E-113 |
| PR-15/16 | Bradi1g11930 | 1.00E-111 |
| PR-15/16 | Bradi2g47680 | 2.00E-51  |
| PR-15/16 | Bradi2g47690 | 1.00E-50  |
| PR-15/16 | Bradi2g11050 | 7.00E-50  |
| PR-15/16 | Bradi2g08790 | 1.00E-47  |
| PR-15/16 | Bradi1g04907 | 2.00E-47  |
| PR-15/16 | Bradi3g43650 | 2.00E-47  |
| PR-15/16 | Bradi2g21010 | 4.00E-46  |
| PR-15/16 | Bradi4g06080 | 4.00E-46  |
| PR-15/16 | Bradi2g60870 | 1.00E-45  |
| PR-15/16 | Bradi3g43660 | 7.00E-45  |
| PR-15/16 | Bradi3g17330 | 2.00E-44  |
| PR-15/16 | Bradi3g43490 | 5.00E-44  |
| PR-15/16 | Bradi3g15220 | 1.00E-43  |
| PR-15/16 | Bradi3g15210 | 4.00E-43  |
| PR-15/16 | Bradi3g15250 | 4.00E-43  |
| PR-15/16 | Bradi3g15200 | 5.00E-43  |
| PR-15/16 | Bradi3g15190 | 8.00E-43  |
| PR-15/16 | Bradi3g17316 | 1.00E-42  |
| PR-15/16 | Bradi5g21910 | 2.00E-42  |

|          |              |          |
|----------|--------------|----------|
| PR-15/16 | Bradi3g15240 | 2.00E-42 |
| PR-15/16 | Bradi3g15230 | 9.00E-42 |
| PR-15/16 | Bradi2g60860 | 4.00E-40 |
| PR-15/16 | Bradi3g15260 | 1.00E-39 |
| PR-15/16 | Bradi3g17308 | 8.00E-39 |
| PR-15/16 | Bradi2g33160 | 7.00E-35 |
| PR-15/16 | Bradi3g44880 | 3.00E-34 |
| PR-15/16 | Bradi3g37670 | 1.00E-28 |
| PR-15/16 | Bradi3g37680 | 5.00E-28 |

|          |              |          |
|----------|--------------|----------|
| PR-15/16 | Bradi4g38550 | 5.00E-24 |
| PR-15/16 | Bradi4g38570 | 2.00E-23 |
| PR-15/16 | Bradi3g44300 | 3.00E-23 |
| PR-15/16 | Bradi4g38560 | 2.00E-20 |
| PR-15/16 | Bradi4g38575 | 7.00E-20 |
| PR-15/16 | Bradi2g00792 | 9.00E-20 |
| PR-15/16 | Bradi4g17030 | 1.00E-08 |
| PR-17    | Bradi3g29710 | 6.00E-74 |
