# Supplementary material for: Theobroma cacao L. pathogenesis-related gene tandem array members show diverse expression dynamics in response to pathogen colonization
Source: PubMed Central journal article supplement (PMC4869279; doi:10.1186/s12864-016-2693-3), 2016-05-17
Supplement: 12864_2016_2693_MOESM6_ESM.pdf [file 12864_2016_2693_MOESM6_ESM.pdf]

| <b>Supplemental Table S6 - Gene IDs and BLASTp E-value for <i>Oryza sativa</i> PR genes</b> |                |                |
|---------------------------------------------------------------------------------------------|----------------|----------------|
| <b>PR Gene Class</b>                                                                        | <b>Gene ID</b> | <b>E-value</b> |
| PR-1                                                                                        | LOC_Os07g03730 | 9.00E-45       |
| PR-1                                                                                        | LOC_Os07g03710 | 1.00E-43       |
| PR-1                                                                                        | LOC_Os10g11500 | 3.00E-43       |
| PR-1                                                                                        | LOC_Os01g28450 | 3.00E-42       |
| PR-1                                                                                        | LOC_Os01g28500 | 2.00E-40       |
| PR-1                                                                                        | LOC_Os06g24290 | 1.00E-39       |
| PR-1                                                                                        | LOC_Os02g27310 | 8.00E-37       |
| PR-1                                                                                        | LOC_Os02g54540 | 1.00E-34       |
| PR-1                                                                                        | LOC_Os07g03740 | 2.00E-34       |
| PR-1                                                                                        | LOC_Os12g43700 | 1.00E-33       |
| PR-1                                                                                        | LOC_Os07g03279 | 2.00E-33       |
| PR-1                                                                                        | LOC_Os07g03319 | 2.00E-33       |
| PR-1                                                                                        | LOC_Os07g03368 | 2.00E-33       |
| PR-1                                                                                        | LOC_Os07g03409 | 2.00E-33       |
| PR-1                                                                                        | LOC_Os07g03458 | 2.00E-33       |
| PR-1                                                                                        | LOC_Os07g03499 | 2.00E-33       |
| PR-1                                                                                        | LOC_Os07g03288 | 7.00E-32       |
| PR-1                                                                                        | LOC_Os07g03377 | 7.00E-32       |
| PR-1                                                                                        | LOC_Os07g03467 | 7.00E-32       |
| PR-1                                                                                        | LOC_Os07g03590 | 7.00E-32       |
| PR-1                                                                                        | LOC_Os05g51680 | 1.00E-31       |
| PR-1                                                                                        | LOC_Os07g03690 | 2.00E-31       |
| PR-1                                                                                        | LOC_Os07g03750 | 1.00E-30       |
| PR-1                                                                                        | LOC_Os07g03580 | 2.00E-29       |
| PR-1                                                                                        | LOC_Os07g03600 | 4.00E-28       |
| PR-1                                                                                        | LOC_Os02g54530 | 2.00E-27       |
| PR-1                                                                                        | LOC_Os07g03680 | 4.00E-27       |
| PR-1                                                                                        | LOC_Os02g54560 | 1.00E-26       |
| PR-1                                                                                        | LOC_Os07g14030 | 1.00E-26       |
| PR-1                                                                                        | LOC_Os07g14070 | 1.00E-26       |
| PR-1                                                                                        | LOC_Os02g27300 | 4.00E-26       |
| PR-1                                                                                        | LOC_Os07g03610 | 2.00E-25       |
| PR-1                                                                                        | LOC_Os04g22230 | 5.00E-25       |

|      |                |          |
|------|----------------|----------|
| PR-1 | LOC_Os07g03620 | 1.00E-24 |
| PR-1 | LOC_Os04g22220 | 2.00E-24 |
| PR-1 | LOC_Os04g22210 | 3.00E-24 |
| PR-1 | LOC_Os02g54570 | 2.00E-22 |
| PR-1 | LOC_Os05g51660 | 2.00E-21 |
| PR-1 | LOC_Os04g22330 | 5.00E-10 |
| PR-2 | LOC_Os01g71340 | 2.00E-82 |
| PR-2 | LOC_Os01g71810 | 2.00E-81 |
| PR-2 | LOC_Os01g71820 | 2.00E-80 |
| PR-2 | LOC_Os01g71830 | 5.00E-80 |
| PR-2 | LOC_Os01g71400 | 4.00E-78 |
| PR-2 | LOC_Os01g71930 | 6.00E-77 |
| PR-2 | LOC_Os01g71670 | 7.00E-75 |
| PR-2 | LOC_Os01g71680 | 2.00E-74 |
| PR-2 | LOC_Os01g71860 | 2.00E-73 |
| PR-2 | LOC_Os01g71690 | 1.00E-72 |
| PR-2 | LOC_Os01g71410 | 1.00E-71 |
| PR-2 | LOC_Os01g71380 | 3.00E-71 |
| PR-2 | LOC_Os05g31140 | 6.00E-71 |
| PR-2 | LOC_Os05g41610 | 1.00E-69 |
| PR-2 | LOC_Os01g58730 | 2.00E-69 |
| PR-2 | LOC_Os01g71350 | 2.00E-69 |
| PR-2 | LOC_Os01g51570 | 1.00E-64 |
| PR-2 | LOC_Os01g53750 | 5.00E-61 |
| PR-2 | LOC_Os01g71474 | 5.00E-59 |
| PR-2 | LOC_Os03g14210 | 3.00E-58 |
| PR-2 | LOC_Os04g33640 | 3.00E-58 |
| PR-2 | LOC_Os09g36280 | 5.00E-58 |
| PR-2 | LOC_Os03g12140 | 6.00E-54 |
| PR-2 | LOC_Os06g34020 | 4.00E-53 |
| PR-2 | LOC_Os02g33000 | 5.00E-53 |
| PR-2 | LOC_Os03g12620 | 3.00E-52 |
| PR-2 | LOC_Os01g64170 | 4.00E-52 |
| PR-2 | LOC_Os02g10660 | 4.00E-52 |
| PR-2 | LOC_Os02g53200 | 5.00E-52 |
| PR-2 | LOC_Os03g46660 | 1.00E-51 |

|      |                |          |
|------|----------------|----------|
| PR-2 | LOC_Os10g07290 | 1.00E-51 |
| PR-2 | LOC_Os06g40490 | 2.00E-51 |
| PR-2 | LOC_Os06g04080 | 3.00E-50 |
| PR-2 | LOC_Os07g35350 | 5.00E-48 |
| PR-2 | LOC_Os03g57880 | 2.00E-46 |
| PR-2 | LOC_Os02g04670 | 1.00E-45 |
| PR-2 | LOC_Os06g39060 | 1.00E-45 |
| PR-2 | LOC_Os08g41410 | 1.00E-45 |
| PR-2 | LOC_Os07g38930 | 2.00E-44 |
| PR-2 | LOC_Os01g71650 | 3.00E-44 |
| PR-2 | LOC_Os08g12800 | 4.00E-44 |
| PR-2 | LOC_Os07g07340 | 6.00E-44 |
| PR-2 | LOC_Os11g36940 | 1.00E-43 |
| PR-2 | LOC_Os03g62860 | 2.00E-42 |
| PR-2 | LOC_Os11g47820 | 2.00E-42 |
| PR-2 | LOC_Os07g13580 | 3.00E-42 |
| PR-2 | LOC_Os03g51240 | 1.00E-41 |
| PR-2 | LOC_Os07g35480 | 1.00E-41 |
| PR-2 | LOC_Os07g35560 | 3.00E-41 |
| PR-2 | LOC_Os03g40330 | 5.00E-41 |
| PR-2 | LOC_Os07g35510 | 2.00E-40 |
| PR-2 | LOC_Os03g18520 | 4.00E-40 |
| PR-2 | LOC_Os03g45390 | 4.00E-40 |
| PR-2 | LOC_Os08g14700 | 1.00E-39 |
| PR-2 | LOC_Os07g35520 | 3.00E-39 |
| PR-2 | LOC_Os09g09980 | 1.00E-38 |
| PR-2 | LOC_Os09g32550 | 4.00E-38 |
| PR-2 | LOC_Os08g23720 | 5.00E-38 |
| PR-2 | LOC_Os07g32600 | 2.00E-36 |
| PR-2 | LOC_Os05g37130 | 5.00E-35 |
| PR-2 | LOC_Os05g45860 | 3.00E-33 |
| PR-2 | LOC_Os03g27980 | 5.00E-33 |
| PR-2 | LOC_Os03g56130 | 5.00E-17 |
| PR-2 | LOC_Os07g41014 | 3.00E-14 |
| PR-2 | LOC_Os03g22530 | 2.00E-13 |
| PR-2 | LOC_Os03g25790 | 3.00E-09 |
| PR-3 | LOC_Os10g39680 | 7.00E-77 |
| PR-3 | LOC_Os06g51060 | 2.00E-71 |
| PR-3 | LOC_Os06g51050 | 5.00E-71 |
| PR-3 | LOC_Os05g33130 | 5.00E-68 |
| PR-3 | LOC_Os03g30470 | 3.00E-66 |

|      |                |          |
|------|----------------|----------|
| PR-3 | LOC_Os03g04060 | 2.00E-65 |
| PR-3 | LOC_Os05g33140 | 5.00E-65 |
| PR-3 | LOC_Os01g18400 | 4.00E-49 |
| PR-3 | LOC_Os05g33150 | 7.00E-49 |
| PR-3 | LOC_Os05g04690 | 3.00E-44 |
| PR-3 | LOC_Os10g39700 | 3.00E-32 |
| PR-3 | LOC_Os08g41100 | 1.00E-31 |
| PR-3 | LOC_Os02g39330 | 2.00E-27 |
| PR-3 | LOC_Os09g32080 | 2.00E-27 |
| PR-3 | LOC_Os04g41620 | 1.00E-26 |
| PR-3 | LOC_Os04g41680 | 7.00E-26 |
| PR-4 | LOC_Os11g37970 | 1.00E-43 |
| PR-4 | LOC_Os11g37950 | 4.00E-42 |
| PR-4 | LOC_Os11g37960 | 1.00E-40 |
| PR-4 | LOC_Os11g37940 | 6.00E-39 |
| PR-5 | LOC_Os06g47600 | 3.00E-68 |
| PR-5 | LOC_Os09g32280 | 8.00E-65 |
| PR-5 | LOC_Os08g43510 | 2.00E-64 |
| PR-5 | LOC_Os10g05660 | 2.00E-62 |
| PR-5 | LOC_Os09g36580 | 3.00E-61 |
| PR-5 | LOC_Os11g47944 | 5.00E-59 |
| PR-5 | LOC_Os04g59370 | 6.00E-59 |
| PR-5 | LOC_Os03g14030 | 1.00E-57 |
| PR-5 | LOC_Os09g36560 | 3.00E-57 |
| PR-5 | LOC_Os03g14050 | 2.00E-56 |
| PR-5 | LOC_Os10g05600 | 7.00E-55 |
| PR-5 | LOC_Os03g13070 | 9.00E-55 |
| PR-5 | LOC_Os06g50240 | 2.00E-53 |
| PR-5 | LOC_Os08g40600 | 3.00E-52 |
| PR-5 | LOC_Os07g23470 | 1.00E-50 |
| PR-5 | LOC_Os01g62260 | 1.00E-44 |
| PR-5 | LOC_Os03g45960 | 2.00E-44 |
| PR-5 | LOC_Os07g23730 | 2.00E-44 |
| PR-5 | LOC_Os03g46070 | 4.00E-44 |
| PR-5 | LOC_Os10g27280 | 1.00E-43 |
| PR-5 | LOC_Os12g43490 | 3.00E-43 |
| PR-5 | LOC_Os12g43450 | 2.00E-39 |
| PR-5 | LOC_Os01g02310 | 5.00E-34 |
| PR-5 | LOC_Os03g46060 | 3.00E-31 |
| PR-5 | LOC_Os12g43380 | 3.00E-25 |
| PR-5 | LOC_Os12g43430 | 3.00E-25 |

|      |                |           |
|------|----------------|-----------|
| PR-5 | LOC_Os12g43440 | 5.00E-24  |
| PR-5 | LOC_Os12g43390 | 3.00E-21  |
| PR-5 | LOC_Os02g02200 | 9.00E-19  |
| PR-5 | LOC_Os11g47680 | 1.00E-17  |
| PR-5 | LOC_Os12g38120 | 6.00E-15  |
| PR-5 | LOC_Os12g43410 | 1.00E-12  |
| PR-5 | LOC_Os10g38100 | 8.00E-11  |
| PR-5 | LOC_Os07g04730 | 2.00E-08  |
| PR-5 | LOC_Os12g38150 | 2.00E-08  |
| PR-5 | LOC_Os12g38170 | 3.00E-08  |
| PR-5 | LOC_Os11g47670 | 3.00E-07  |
| PR-6 | LOC_Os12g36210 | 3.00E-08  |
| PR-6 | LOC_Os05g01920 | 5.00E-07  |
| PR-6 | LOC_Os11g17790 | 9.00E-07  |
| PR-6 | LOC_Os05g25630 | 8.00E-06  |
| PR-7 | LOC_Os10g38080 | 6.00E-158 |
| PR-7 | LOC_Os04g47160 | 2.00E-156 |
| PR-7 | LOC_Os03g02750 | 4.00E-153 |
| PR-7 | LOC_Os12g23980 | 2.00E-145 |
| PR-7 | LOC_Os02g44590 | 6.00E-144 |
| PR-7 | LOC_Os03g04950 | 3.00E-142 |
| PR-7 | LOC_Os07g48650 | 1.00E-141 |
| PR-7 | LOC_Os03g55350 | 4.00E-138 |
| PR-7 | LOC_Os04g47150 | 5.00E-135 |
| PR-7 | LOC_Os05g30580 | 2.00E-133 |
| PR-7 | LOC_Os03g40830 | 1.00E-131 |
| PR-7 | LOC_Os08g35090 | 2.00E-128 |
| PR-7 | LOC_Os09g26920 | 2.00E-128 |
| PR-7 | LOC_Os03g13930 | 5.00E-126 |
| PR-7 | LOC_Os02g53860 | 3.00E-125 |
| PR-7 | LOC_Os04g48416 | 8.00E-123 |
| PR-7 | LOC_Os03g31630 | 3.00E-122 |
| PR-7 | LOC_Os05g36010 | 6.00E-122 |
| PR-7 | LOC_Os09g30250 | 4.00E-120 |
| PR-7 | LOC_Os04g10360 | 2.00E-118 |
| PR-7 | LOC_Os06g40700 | 5.00E-118 |
| PR-7 | LOC_Os04g35140 | 2.00E-114 |
| PR-7 | LOC_Os07g39020 | 3.00E-114 |
| PR-7 | LOC_Os10g25450 | 8.00E-114 |
| PR-7 | LOC_Os02g10520 | 4.00E-113 |
| PR-7 | LOC_Os02g53970 | 1.00E-112 |

|      |                |           |
|------|----------------|-----------|
| PR-7 | LOC_Os01g64860 | 8.00E-111 |
| PR-7 | LOC_Os08g23740 | 1.00E-109 |
| PR-7 | LOC_Os01g52750 | 4.00E-107 |
| PR-7 | LOC_Os01g64850 | 4.00E-106 |
| PR-7 | LOC_Os06g41880 | 1.00E-105 |
| PR-7 | LOC_Os09g36110 | 1.00E-105 |
| PR-7 | LOC_Os02g53910 | 1.00E-104 |
| PR-7 | LOC_Os01g58240 | 7.00E-95  |
| PR-7 | LOC_Os09g30458 | 8.00E-94  |
| PR-7 | LOC_Os04g03050 | 1.00E-92  |
| PR-7 | LOC_Os03g06290 | 1.00E-89  |
| PR-7 | LOC_Os04g03100 | 2.00E-88  |
| PR-7 | LOC_Os02g53850 | 3.00E-87  |
| PR-7 | LOC_Os04g02980 | 5.00E-86  |
| PR-7 | LOC_Os01g58290 | 8.00E-85  |
| PR-7 | LOC_Os02g16940 | 2.00E-84  |
| PR-7 | LOC_Os01g58270 | 2.00E-82  |
| PR-7 | LOC_Os02g17090 | 4.00E-81  |
| PR-7 | LOC_Os04g03796 | 1.00E-78  |
| PR-7 | LOC_Os02g17150 | 4.00E-78  |
| PR-7 | LOC_Os01g56320 | 2.00E-74  |
| PR-7 | LOC_Os04g03810 | 1.00E-73  |
| PR-7 | LOC_Os01g58280 | 2.00E-72  |
| PR-7 | LOC_Os06g48650 | 1.00E-71  |
| PR-7 | LOC_Os11g15520 | 1.00E-68  |
| PR-7 | LOC_Os04g45960 | 1.00E-67  |
| PR-7 | LOC_Os02g17080 | 7.00E-65  |
| PR-7 | LOC_Os02g17060 | 8.00E-58  |
| PR-7 | LOC_Os01g50680 | 1.00E-49  |
| PR-7 | LOC_Os02g17000 | 2.00E-47  |
| PR-7 | LOC_Os04g03850 | 3.00E-36  |
| PR-7 | LOC_Os10g41880 | 9.00E-13  |
| PR-8 | LOC_Os01g64110 | 4.00E-87  |
| PR-8 | LOC_Os07g19040 | 3.00E-86  |
| PR-8 | LOC_Os01g64100 | 3.00E-80  |
| PR-8 | LOC_Os01g49320 | 6.00E-77  |
| PR-8 | LOC_Os01g47070 | 1.00E-75  |
| PR-8 | LOC_Os01g19750 | 1.00E-74  |
| PR-8 | LOC_Os04g27980 | 2.00E-54  |
| PR-8 | LOC_Os07g23850 | 1.00E-49  |
| PR-8 | LOC_Os11g47600 | 3.00E-39  |

|      |                |          |
|------|----------------|----------|
| PR-8 | LOC_Os11g47610 | 2.00E-37 |
| PR-8 | LOC_Os11g47550 | 2.00E-36 |
| PR-8 | LOC_Os11g47580 | 4.00E-36 |
| PR-8 | LOC_Os11g47590 | 5.00E-36 |
| PR-8 | LOC_Os11g47530 | 1.00E-34 |
| PR-8 | LOC_Os11g47500 | 4.00E-33 |
| PR-8 | LOC_Os11g47520 | 6.00E-33 |
| PR-8 | LOC_Os11g47510 | 8.00E-33 |
| PR-8 | LOC_Os05g15850 | 6.00E-32 |
| PR-8 | LOC_Os11g47560 | 1.00E-31 |
| PR-8 | LOC_Os11g47570 | 1.00E-31 |
| PR-8 | LOC_Os07g43820 | 3.00E-31 |
| PR-8 | LOC_Os05g15770 | 1.00E-29 |
| PR-8 | LOC_Os05g15920 | 2.00E-28 |
| PR-8 | LOC_Os08g40680 | 2.00E-28 |
| PR-8 | LOC_Os08g40740 | 7.00E-27 |
| PR-8 | LOC_Os05g15880 | 4.00E-26 |
| PR-8 | LOC_Os08g40690 | 3.00E-23 |
| PR-8 | LOC_Os06g25010 | 3.00E-20 |
| PR-8 | LOC_Os07g01770 | 5.00E-16 |
| PR-9 | LOC_Os03g13200 | 2.00E-89 |
| PR-9 | LOC_Os03g13180 | 8.00E-88 |
| PR-9 | LOC_Os03g32050 | 2.00E-84 |
| PR-9 | LOC_Os03g13210 | 7.00E-84 |
| PR-9 | LOC_Os01g36240 | 4.00E-82 |
| PR-9 | LOC_Os10g02070 | 5.00E-80 |
| PR-9 | LOC_Os04g34630 | 3.00E-79 |
| PR-9 | LOC_Os01g15830 | 1.00E-78 |
| PR-9 | LOC_Os07g48030 | 6.00E-78 |
| PR-9 | LOC_Os11g02130 | 6.00E-78 |
| PR-9 | LOC_Os06g35520 | 1.00E-77 |
| PR-9 | LOC_Os12g02080 | 7.00E-77 |
| PR-9 | LOC_Os06g35480 | 1.00E-75 |
| PR-9 | LOC_Os10g02040 | 5.00E-75 |
| PR-9 | LOC_Os07g48020 | 2.00E-74 |
| PR-9 | LOC_Os02g14180 | 4.00E-74 |
| PR-9 | LOC_Os06g35490 | 1.00E-73 |
| PR-9 | LOC_Os04g55740 | 5.00E-73 |
| PR-9 | LOC_Os01g10850 | 3.00E-72 |
| PR-9 | LOC_Os07g48050 | 5.00E-72 |
| PR-9 | LOC_Os07g47990 | 1.00E-71 |

|      |                |          |
|------|----------------|----------|
| PR-9 | LOC_Os06g33080 | 2.00E-71 |
| PR-9 | LOC_Os01g15810 | 3.00E-71 |
| PR-9 | LOC_Os02g14160 | 4.00E-69 |
| PR-9 | LOC_Os06g33100 | 3.00E-68 |
| PR-9 | LOC_Os03g22010 | 5.00E-68 |
| PR-9 | LOC_Os02g14460 | 6.00E-68 |
| PR-9 | LOC_Os07g48010 | 1.00E-67 |
| PR-9 | LOC_Os02g14430 | 2E-67    |
| PR-9 | LOC_Os08g20730 | 7.00E-67 |
| PR-9 | LOC_Os02g14440 | 8.00E-67 |
| PR-9 | LOC_Os06g16350 | 2.00E-66 |
| PR-9 | LOC_Os06g32960 | 3.00E-66 |
| PR-9 | LOC_Os09g29490 | 4.00E-66 |
| PR-9 | LOC_Os03g22020 | 7.00E-65 |
| PR-9 | LOC_Os02g14170 | 3.00E-64 |
| PR-9 | LOC_Os06g32990 | 5.00E-64 |
| PR-9 | LOC_Os07g48040 | 5.00E-64 |
| PR-9 | LOC_Os06g32980 | 6.00E-64 |
| PR-9 | LOC_Os05g06970 | 1.00E-63 |
| PR-9 | LOC_Os12g02060 | 7.00E-62 |
| PR-9 | LOC_Os03g02939 | 1.00E-61 |
| PR-9 | LOC_Os08g42030 | 4.00E-61 |
| PR-9 | LOC_Os01g73220 | 5.00E-61 |
| PR-9 | LOC_Os05g41990 | 1.00E-60 |
| PR-9 | LOC_Os03g02920 | 2.00E-60 |
| PR-9 | LOC_Os07g01420 | 2.00E-60 |
| PR-9 | LOC_Os07g48060 | 6.00E-60 |
| PR-9 | LOC_Os06g46799 | 8.00E-60 |
| PR-9 | LOC_Os11g43980 | 1.00E-59 |
| PR-9 | LOC_Os01g07770 | 3.00E-59 |
| PR-9 | LOC_Os06g29470 | 3.00E-59 |
| PR-9 | LOC_Os06g20150 | 9.00E-59 |
| PR-9 | LOC_Os03g55410 | 1.00E-58 |
| PR-9 | LOC_Os04g53640 | 1.00E-58 |
| PR-9 | LOC_Os04g56180 | 2.00E-58 |
| PR-9 | LOC_Os07g01370 | 2.00E-58 |
| PR-9 | LOC_Os10g39170 | 2.00E-58 |
| PR-9 | LOC_Os09g32964 | 6.00E-58 |
| PR-9 | LOC_Os01g16450 | 1.00E-57 |
| PR-9 | LOC_Os01g73200 | 2.00E-57 |
| PR-9 | LOC_Os02g58720 | 3.00E-57 |

|      |                |          |
|------|----------------|----------|
| PR-9 | LOC_Os07g01400 | 3.00E-57 |
| PR-9 | LOC_Os11g02100 | 1.00E-56 |
| PR-9 | LOC_Os08g02110 | 2.00E-56 |
| PR-9 | LOC_Os02g50770 | 9.00E-56 |
| PR-9 | LOC_Os07g34710 | 1.00E-55 |
| PR-9 | LOC_Os01g22336 | 2.00E-55 |
| PR-9 | LOC_Os05g04490 | 2.00E-55 |
| PR-9 | LOC_Os01g57730 | 1.00E-54 |
| PR-9 | LOC_Os04g59150 | 3.00E-54 |
| PR-9 | LOC_Os01g73170 | 5.00E-54 |
| PR-9 | LOC_Os01g22370 | 6.00E-54 |
| PR-9 | LOC_Os01g22249 | 3.00E-53 |
| PR-9 | LOC_Os07g31610 | 1.00E-52 |
| PR-9 | LOC_Os03g36560 | 2.00E-52 |
| PR-9 | LOC_Os07g01410 | 3.00E-52 |
| PR-9 | LOC_Os01g28030 | 5.00E-52 |
| PR-9 | LOC_Os06g48030 | 5.00E-52 |
| PR-9 | LOC_Os07g02440 | 7.00E-52 |
| PR-9 | LOC_Os10g41720 | 4.00E-51 |
| PR-9 | LOC_Os10g39160 | 5.00E-51 |
| PR-9 | LOC_Os12g08920 | 7.00E-51 |
| PR-9 | LOC_Os04g01550 | 1.00E-50 |
| PR-9 | LOC_Os04g39100 | 1.00E-50 |
| PR-9 | LOC_Os11g10460 | 1.00E-50 |
| PR-9 | LOC_Os07g34670 | 2.00E-50 |
| PR-9 | LOC_Os06g33090 | 3.00E-50 |
| PR-9 | LOC_Os03g55420 | 4E-50    |
| PR-9 | LOC_Os05g04470 | 5.00E-50 |
| PR-9 | LOC_Os06g13050 | 6.00E-50 |
| PR-9 | LOC_Os05g04450 | 7.00E-50 |
| PR-9 | LOC_Os03g25360 | 8.00E-50 |
| PR-9 | LOC_Os03g25330 | 9.00E-50 |
| PR-9 | LOC_Os12g34524 | 1.00E-49 |
| PR-9 | LOC_Os02g06630 | 3.00E-49 |
| PR-9 | LOC_Os01g51550 | 4.00E-49 |
| PR-9 | LOC_Os01g22230 | 1.00E-48 |
| PR-9 | LOC_Os03g05770 | 1.00E-48 |
| PR-9 | LOC_Os07g44590 | 2.00E-48 |
| PR-9 | LOC_Os03g25370 | 3.00E-48 |
| PR-9 | LOC_Os05g04500 | 7.00E-48 |
| PR-9 | LOC_Os05g42000 | 2.00E-47 |

|      |                |          |
|------|----------------|----------|
| PR-9 | LOC_Os06g48010 | 2.00E-47 |
| PR-9 | LOC_Os01g22352 | 5.00E-47 |
| PR-9 | LOC_Os09g15510 | 1.00E-46 |
| PR-9 | LOC_Os06g48000 | 3.00E-46 |
| PR-9 | LOC_Os09g15500 | 3.00E-46 |
| PR-9 | LOC_Os03g25320 | 5.00E-46 |
| PR-9 | LOC_Os04g59260 | 1.00E-45 |
| PR-9 | LOC_Os01g73190 | 4.00E-45 |
| PR-9 | LOC_Os04g59160 | 4.00E-45 |
| PR-9 | LOC_Os03g25280 | 5.00E-45 |
| PR-9 | LOC_Os03g25300 | 5.00E-45 |
| PR-9 | LOC_Os07g06300 | 7.00E-45 |
| PR-9 | LOC_Os07g06190 | 8.00E-45 |
| PR-9 | LOC_Os07g44550 | 1.00E-44 |
| PR-9 | LOC_Os04g59200 | 2.00E-44 |
| PR-9 | LOC_Os06g27850 | 2.00E-44 |
| PR-9 | LOC_Os04g59210 | 3.00E-44 |
| PR-9 | LOC_Os03g25340 | 4.00E-44 |
| PR-9 | LOC_Os01g19020 | 4.00E-43 |
| PR-9 | LOC_Os06g48020 | 1.00E-42 |
| PR-9 | LOC_Os07g44460 | 1.00E-42 |
| PR-9 | LOC_Os05g04380 | 6.00E-42 |
| PR-9 | LOC_Os07g44480 | 2.00E-41 |
| PR-9 | LOC_Os07g44499 | 6.00E-41 |
| PR-9 | LOC_Os01g18930 | 1.00E-40 |
| PR-9 | LOC_Os04g59190 | 4.00E-40 |
| PR-9 | LOC_Os07g49360 | 5.00E-40 |
| PR-9 | LOC_Os01g18970 | 5.00E-39 |
| PR-9 | LOC_Os07g06175 | 6.00E-39 |
| PR-9 | LOC_Os05g04440 | 8.00E-36 |
| PR-9 | LOC_Os01g18950 | 3.00E-35 |
| PR-9 | LOC_Os01g18910 | 4.00E-35 |
| PR-9 | LOC_Os05g14260 | 6.00E-33 |
| PR-9 | LOC_Os05g04410 | 9.00E-31 |
| PR-9 | LOC_Os10g01760 | 2.00E-30 |
| PR-9 | LOC_Os07g06380 | 2.00E-29 |
| PR-9 | LOC_Os04g04750 | 2.00E-26 |
| PR-9 | LOC_Os01g18890 | 3.00E-26 |
| PR-9 | LOC_Os04g06860 | 1.00E-14 |
| PR-9 | LOC_Os07g01380 | 3.00E-14 |
| PR-9 | LOC_Os12g07830 | 1.00E-13 |

|       |                |          |
|-------|----------------|----------|
| PR-9  | LOC_Os12g07820 | 4.00E-13 |
| PR-9  | LOC_Os02g34810 | 7.00E-13 |
| PR-9  | LOC_Os04g35520 | 3.00E-12 |
| PR-9  | LOC_Os08g41090 | 7.00E-12 |
| PR-9  | LOC_Os12g09460 | 2.00E-11 |
| PR-9  | LOC_Os08g43560 | 3.00E-09 |
| PR-9  | LOC_Os01g18900 | 2.00E-07 |
| PR-10 | LOC_Os03g18850 | 1.00E-18 |
| PR-10 | LOC_Os04g50700 | 3.00E-07 |
| PR-10 | LOC_Os12g36880 | 3.00E-06 |
| PR-10 | LOC_Os04g50710 | 3.00E-06 |
| PR-11 | LOC_Os11g27400 | 2.00E-52 |
| PR-11 | LOC_Os04g30770 | 4.00E-49 |
| PR-13 | LOC_Os06g31890 | 7.00E-14 |
| PR-13 | LOC_Os06g32160 | 7.00E-14 |
| PR-13 | LOC_Os06g32240 | 7.00E-14 |
| PR-13 | LOC_Os06g31800 | 1.00E-13 |
| PR-13 | LOC_Os06g31930 | 2.00E-13 |
| PR-13 | LOC_Os06g31960 | 2.00E-13 |
| PR-13 | LOC_Os06g32020 | 2.00E-13 |
| PR-13 | LOC_Os06g31280 | 9.00E-13 |
| PR-13 | LOC_Os06g32350 | 1.00E-12 |
| PR-13 | LOC_Os06g32550 | 6.00E-12 |
| PR-13 | LOC_Os06g32600 | 2.00E-11 |
| PR-14 | LOC_Os11g24070 | 2.00E-22 |
| PR-14 | LOC_Os11g02369 | 8.00E-21 |
| PR-14 | LOC_Os12g02310 | 8.00E-21 |
| PR-14 | LOC_Os11g02389 | 1.00E-20 |
| PR-14 | LOC_Os12g02320 | 2.00E-20 |
| PR-14 | LOC_Os11g02400 | 2.00E-17 |
| PR-14 | LOC_Os12g02330 | 2.00E-16 |
| PR-14 | LOC_Os12g02340 | 3.00E-16 |
| PR-14 | LOC_Os06g34840 | 8.00E-14 |
| PR-14 | LOC_Os11g02350 | 1.00E-13 |
| PR-14 | LOC_Os12g02300 | 1.00E-13 |
| PR-14 | LOC_Os05g40010 | 4.00E-13 |
| PR-14 | LOC_Os01g60740 | 2.00E-11 |
| PR-14 | LOC_Os08g03690 | 4.00E-11 |
| PR-14 | LOC_Os02g24720 | 1.00E-08 |
| PR-14 | LOC_Os01g12020 | 2.00E-07 |
| PR-14 | LOC_Os03g59380 | 3.00E-07 |

|          |                |          |
|----------|----------------|----------|
| PR-15/16 | LOC_Os03g48780 | 5.00E-98 |
| PR-15/16 | LOC_Os03g48760 | 6.00E-97 |
| PR-15/16 | LOC_Os03g48770 | 1.00E-96 |
| PR-15/16 | LOC_Os03g48750 | 1.00E-93 |
| PR-15/16 | LOC_Os02g29020 | 7.00E-51 |
| PR-15/16 | LOC_Os02g29000 | 1.00E-49 |
| PR-15/16 | LOC_Os08g13440 | 2.00E-49 |
| PR-15/16 | LOC_Os05g19670 | 3.00E-49 |
| PR-15/16 | LOC_Os08g08980 | 3.00E-49 |
| PR-15/16 | LOC_Os08g08960 | 4.00E-49 |
| PR-15/16 | LOC_Os08g08970 | 2.00E-48 |
| PR-15/16 | LOC_Os03g44880 | 3.00E-48 |
| PR-15/16 | LOC_Os08g08920 | 2.00E-47 |
| PR-15/16 | LOC_Os03g58980 | 3.00E-47 |
| PR-15/16 | LOC_Os01g18170 | 3.00E-46 |
| PR-15/16 | LOC_Os04g52720 | 4.00E-46 |
| PR-15/16 | LOC_Os01g50900 | 5.00E-46 |
| PR-15/16 | LOC_Os08g09080 | 7.00E-46 |
| PR-15/16 | LOC_Os01g14670 | 1.00E-45 |
| PR-15/16 | LOC_Os08g08990 | 1.00E-45 |
| PR-15/16 | LOC_Os03g59010 | 2.00E-45 |
| PR-15/16 | LOC_Os12g05860 | 3.00E-45 |
| PR-15/16 | LOC_Os12g05840 | 5.00E-45 |
| PR-15/16 | LOC_Os12g05870 | 1.00E-44 |
| PR-15/16 | LOC_Os08g09000 | 9.00E-44 |
| PR-15/16 | LOC_Os08g09060 | 2.00E-43 |
| PR-15/16 | LOC_Os08g09020 | 5.00E-43 |
| PR-15/16 | LOC_Os08g09010 | 9.00E-43 |
| PR-15/16 | LOC_Os08g09040 | 3.00E-42 |
| PR-15/16 | LOC_Os01g72300 | 1.00E-41 |
| PR-15/16 | LOC_Os12g05880 | 8.00E-37 |
| PR-15/16 | LOC_Os02g32980 | 2.00E-35 |
| PR-15/16 | LOC_Os08g35750 | 2.00E-33 |
| PR-15/16 | LOC_Os03g08150 | 5.00E-32 |
| PR-15/16 | LOC_Os08g35760 | 1.00E-30 |
| PR-15/16 | LOC_Os09g39530 | 4.00E-25 |
| PR-15/16 | LOC_Os11g33110 | 9.00E-25 |
| PR-15/16 | LOC_Os09g39520 | 3.00E-24 |
| PR-15/16 | LOC_Os09g39510 | 5.00E-24 |
| PR-15/16 | LOC_Os03g58990 | 2.00E-20 |
| PR-15/16 | LOC_Os03g21790 | 3.00E-06 |
