# Supplementary material for: Theobroma cacao L. pathogenesis-related gene tandem array members show diverse expression dynamics in response to pathogen colonization
Source: PubMed Central journal article supplement (PMC4869279; doi:10.1186/s12864-016-2693-3), 2016-05-17
Supplement: 12864_2016_2693_MOESM7_ESM.pdf [file 12864_2016_2693_MOESM7_ESM.pdf]

| <b>Supplemental Table S7 - Gene IDs and BLASTp E-value for <i>Populus trichocarpa</i> PR genes</b> |                    |                |
|----------------------------------------------------------------------------------------------------|--------------------|----------------|
| <b>PR Gene Family</b>                                                                              | <b>Gene ID</b>     | <b>E-value</b> |
| PR-1                                                                                               | Potri.009G083300.1 | 1.00E-66       |
| PR-1                                                                                               | Potri.009G083100.1 | 2.00E-66       |
| PR-1                                                                                               | Potri.009G083600.1 | 4.00E-64       |
| PR-1                                                                                               | Potri.009G083000.1 | 5.00E-63       |
| PR-1                                                                                               | Potri.T131500.1    | 8.00E-60       |
| PR-1                                                                                               | Potri.009G082900.1 | 4.00E-57       |
| PR-1                                                                                               | Potri.001G288600.1 | 2.00E-56       |
| PR-1                                                                                               | Potri.009G082800.1 | 9.00E-53       |
| PR-1                                                                                               | Potri.T131400.1    | 2.00E-52       |
| PR-1                                                                                               | Potri.001G288400.1 | 2.00E-52       |
| PR-1                                                                                               | Potri.T093500.1    | 3.00E-48       |
| PR-1                                                                                               | Potri.006G171300.1 | 5.00E-46       |
| PR-1                                                                                               | Potri.T093600.1    | 8.00E-43       |
| PR-1                                                                                               | Potri.018G007000.1 | 9.00E-41       |
| PR-1                                                                                               | Potri.016G082000.1 | 2.00E-30       |
| PR-1                                                                                               | Potri.006G215600.1 | 8.00E-30       |
| PR-1                                                                                               | Potri.005G130100.1 | 1.00E-29       |
| PR-1                                                                                               | Potri.007G033200.1 | 4.00E-28       |
| PR-1                                                                                               | Potri.009G083400.1 | 8.00E-14       |
| PR-2                                                                                               | Potri.001G255100.1 | 1.00E-125      |
| PR-2                                                                                               | Potri.010G142800.1 | 4.00E-113      |
| PR-2                                                                                               | Potri.T167100.1    | 1.00E-110      |
| PR-2                                                                                               | Potri.016G057400.1 | 2.00E-104      |
| PR-2                                                                                               | Potri.009G050300.1 | 3.00E-103      |
| PR-2                                                                                               | Potri.016G057600.1 | 8.00E-100      |
| PR-2                                                                                               | Potri.006G046100.1 | 2.00E-99       |
| PR-2                                                                                               | Potri.006G048100.1 | 3.00E-98       |
| PR-2                                                                                               | Potri.002G089200.1 | 2.00E-70       |
| PR-2                                                                                               | Potri.009G050400.1 | 2.00E-69       |
| PR-2                                                                                               | Potri.005G172000.1 | 1.00E-68       |
| PR-2                                                                                               | Potri.014G158400.1 | 1.00E-67       |
| PR-2                                                                                               | Potri.018G068600.1 | 2.00E-67       |
| PR-2                                                                                               | Potri.006G067500.1 | 3.00E-66       |

|      |                    |          |
|------|--------------------|----------|
| PR-2 | Potri.004G202400.1 | 1.00E-65 |
| PR-2 | Potri.003G032600.1 | 1.00E-64 |
| PR-2 | Potri.011G084900.1 | 3.00E-64 |
| PR-2 | Potri.018G129500.1 | 4.00E-64 |
| PR-2 | Potri.002G224600.1 | 5.00E-63 |
| PR-2 | Potri.004G153800.1 | 8.00E-63 |
| PR-2 | Potri.004G097400.1 | 8.00E-63 |
| PR-2 | Potri.004G132700.1 | 2.00E-62 |
| PR-2 | Potri.001G192200.1 | 2.00E-62 |
| PR-2 | Potri.011G094400.1 | 4.00E-62 |
| PR-2 | Potri.014G182800.1 | 6.00E-62 |
| PR-2 | Potri.014G185100.1 | 1.00E-61 |
| PR-2 | Potri.002G261800.1 | 2.00E-61 |
| PR-2 | Potri.014G184300.1 | 2.00E-61 |
| PR-2 | Potri.009G163700.1 | 3.00E-61 |
| PR-2 | Potri.014G183800.1 | 4.00E-61 |
| PR-2 | Potri.011G152400.1 | 7.00E-61 |
| PR-2 | Potri.014G184100.1 | 7.00E-61 |
| PR-2 | Potri.001G449100.1 | 1.00E-60 |
| PR-2 | Potri.014G182500.1 | 2.00E-60 |
| PR-2 | Potri.012G017800.1 | 9.00E-60 |
| PR-2 | Potri.009G115400.1 | 1.00E-59 |
| PR-2 | Potri.010G108500.1 | 9.00E-59 |
| PR-2 | Potri.004G086400.1 | 1.00E-58 |
| PR-2 | Potri.014G184900.1 | 7.00E-58 |
| PR-2 | Potri.014G182000.1 | 3.00E-57 |
| PR-2 | Potri.010G203800.1 | 2.00E-56 |
| PR-2 | Potri.017G130200.1 | 2.00E-56 |
| PR-2 | Potri.008G055900.1 | 5.00E-56 |
| PR-2 | Potri.002G007300.1 | 1.00E-55 |
| PR-2 | Potri.008G056000.1 | 1.00E-55 |
| PR-2 | Potri.008G133200.1 | 1.00E-55 |
| PR-2 | Potri.001G006500.1 | 1.00E-55 |
| PR-2 | Potri.014G184600.1 | 2.00E-55 |
| PR-2 | Potri.015G010100.1 | 3.00E-55 |
| PR-2 | Potri.004G010500.1 | 2.00E-54 |

|      |                    |          |
|------|--------------------|----------|
| PR-2 | Potri.006G080600.1 | 4.00E-54 |
| PR-2 | Potri.001G240000.1 | 6.00E-54 |
| PR-3 | Potri.004G182000.1 | 5.00E-95 |
| PR-3 | Potri.009G141700.1 | 5.00E-92 |
| PR-3 | Potri.T175200.1    | 8.00E-80 |
| PR-3 | Potri.009G142300.1 | 2.00E-74 |
| PR-3 | Potri.009G142000.1 | 1.00E-71 |
| PR-3 | Potri.T175300.1    | 8.00E-71 |
| PR-3 | Potri.009G142200.1 | 1.00E-70 |
| PR-3 | Potri.009G142100.1 | 8.00E-70 |
| PR-3 | Potri.009G141800.1 | 3.00E-69 |
| PR-3 | Potri.004G182100.1 | 1.00E-66 |
| PR-3 | Potri.014G111800.1 | 4.00E-65 |
| PR-3 | Potri.002G186500.1 | 2.00E-64 |
| PR-3 | Potri.010G141600.1 | 1.00E-33 |
| PR-3 | Potri.019G094000.1 | 6.00E-33 |
| PR-3 | Potri.019G093800.1 | 7.00E-33 |
| PR-3 | Potri.019G094100.1 | 1.00E-31 |
| PR-3 | Potri.013G125000.1 | 3.00E-31 |
| PR-3 | Potri.013G125100.1 | 3.00E-31 |
| PR-3 | Potri.019G093900.1 | 2.00E-30 |
| PR-3 | Potri.014G146600.1 | 7.00E-30 |
| PR-3 | Potri.019G093700.1 | 7.00E-29 |
| PR-4 | Potri.013G041600.1 | 2.00E-57 |
| PR-4 | Potri.013G041700.1 | 7.00E-56 |
| PR-4 | Potri.005G054000.1 | 9.00E-56 |
| PR-4 | Potri.013G041900.1 | 7.00E-55 |
| PR-5 | Potri.012G047800.1 | 8.00E-89 |
| PR-5 | Potri.004G173200.1 | 8.00E-88 |
| PR-5 | Potri.005G112600.1 | 1.00E-87 |
| PR-5 | Potri.015G039200.1 | 8.00E-87 |
| PR-5 | Potri.009G132500.1 | 9.00E-87 |
| PR-5 | Potri.001G221400.1 | 6.00E-85 |
| PR-5 | Potri.014G040700.1 | 9.00E-84 |
| PR-5 | Potri.001G221700.1 | 7.00E-83 |
| PR-5 | Potri.001G222100.1 | 7.00E-83 |
| PR-5 | Potri.001G221100.1 | 1.00E-82 |
| PR-5 | Potri.001G221900.1 | 1.00E-82 |
| PR-5 | Potri.001G221800.1 | 2.00E-81 |
| PR-5 | Potri.001G221500.1 | 2.00E-81 |
| PR-5 | Potri.002G020500.1 | 1.00E-80 |

|      |                    |          |
|------|--------------------|----------|
| PR-5 | Potri.005G240900.1 | 1.00E-80 |
| PR-5 | Potri.001G221200.1 | 2.00E-80 |
| PR-5 | Potri.005G241000.1 | 5.00E-79 |
| PR-5 | Potri.005G112700.1 | 2.00E-78 |
| PR-5 | Potri.002G020400.1 | 4.00E-78 |
| PR-5 | Potri.001G220900.1 | 2.00E-76 |
| PR-5 | Potri.015G000800.1 | 2.00E-75 |
| PR-5 | Potri.005G173900.1 | 1.00E-73 |
| PR-5 | Potri.002G087100.1 | 6.00E-73 |
| PR-5 | Potri.012G004800.1 | 6.00E-73 |
| PR-5 | Potri.006G088100.1 | 9.00E-73 |
| PR-5 | Potri.001G210400.1 | 3.00E-69 |
| PR-5 | Potri.010G200800.1 | 3.00E-66 |
| PR-5 | Potri.003G020100.1 | 8.00E-66 |
| PR-5 | Potri.009G132200.1 | 2.00E-65 |
| PR-5 | Potri.017G075500.1 | 1.00E-63 |
| PR-5 | Potri.004G014700.1 | 2.00E-62 |
| PR-5 | Potri.T091200.1    | 1.00E-59 |
| PR-5 | Potri.011G003900.1 | 1.00E-56 |
| PR-5 | Potri.004G014400.1 | 3.00E-56 |
| PR-5 | Potri.009G028800.1 | 1.00E-52 |
| PR-5 | Potri.001G107600.1 | 2.00E-52 |
| PR-5 | Potri.T091600.1    | 2.00E-51 |
| PR-5 | Potri.T094100.1    | 4.00E-50 |
| PR-5 | Potri.001G102400.1 | 4.00E-50 |
| PR-5 | Potri.001G237600.1 | 5.00E-49 |
| PR-5 | Potri.T091300.1    | 1.00E-46 |
| PR-5 | Potri.001G221300.1 | 8.00E-42 |
| PR-5 | Potri.001G107800.1 | 4.00E-41 |
| PR-5 | Potri.002G133200.1 | 4.00E-37 |
| PR-5 | Potri.004G014200.1 | 9.00E-32 |
| PR-5 | Potri.001G222000.1 | 1.00E-30 |
| PR-5 | Potri.T094200.1    | 8.00E-24 |
| PR-5 | Potri.001G221600.1 | 1.00E-23 |
| PR-5 | Potri.011G004000.1 | 4.00E-19 |
| PR-5 | Potri.001G107700.1 | 2.00E-17 |
| PR-6 | Potri.010G075400.1 | 2.00E-13 |
| PR-6 | Potri.011G110100.1 | 6.00E-13 |
| PR-6 | Potri.010G075600.1 | 7.00E-13 |
| PR-6 | Potri.011G110400.1 | 7.00E-13 |
| PR-6 | Potri.016G078900.1 | 4.00E-12 |

|      |                    |           |
|------|--------------------|-----------|
| PR-6 | Potri.010G075800.1 | 6.00E-12  |
| PR-6 | Potri.005G221000.1 | 3.00E-11  |
| PR-6 | Potri.010G075200.1 | 5.00E-11  |
| PR-6 | Potri.016G079100.1 | 7.00E-11  |
| PR-6 | Potri.009G028300.1 | 1.00E-10  |
| PR-6 | Potri.016G079000.1 | 1.00E-10  |
| PR-6 | Potri.006G212200.1 | 2.00E-10  |
| PR-6 | Potri.010G075500.1 | 4.00E-10  |
| PR-6 | Potri.010G075300.1 | 4.00E-10  |
| PR-6 | Potri.010G075700.1 | 5.00E-10  |
| PR-6 | Potri.006G212000.1 | 6.00E-10  |
| PR-6 | Potri.016G078800.1 | 9.00E-10  |
| PR-6 | Potri.002G042300.1 | 3.00E-07  |
| PR-6 | Potri.T083400.1    | 2.00E-06  |
| PR-6 | Potri.006G088700.1 | 3.00E-06  |
| PR-6 | Potri.T082800.1    | 4.00E-06  |
| PR-6 | Potri.006G088500.1 | 4.00E-06  |
| PR-7 | Potri.T004700.1    | 0         |
| PR-7 | Potri.003G118800.1 | 0         |
| PR-7 | Potri.003G118700.1 | 0         |
| PR-7 | Potri.003G118500.1 | 0         |
| PR-7 | Potri.001G113700.1 | 0         |
| PR-7 | Potri.014G074600.1 | 2.00E-173 |
| PR-7 | Potri.009G133400.1 | 4.00E-166 |
| PR-7 | Potri.004G173900.1 | 7.00E-165 |
| PR-7 | Potri.002G256300.1 | 3.00E-161 |
| PR-7 | Potri.003G067000.1 | 9.00E-157 |
| PR-7 | Potri.005G145300.1 | 3.00E-156 |
| PR-7 | Potri.001G167300.1 | 3.00E-153 |
| PR-7 | Potri.014G018900.1 | 6.00E-148 |
| PR-7 | Potri.002G120400.1 | 1.00E-147 |
| PR-7 | Potri.014G171600.1 | 2.00E-147 |
| PR-7 | Potri.011G165900.1 | 3.00E-146 |
| PR-7 | Potri.012G131500.1 | 1.00E-144 |
| PR-7 | Potri.001G163600.1 | 2.00E-143 |
| PR-7 | Potri.001G469000.1 | 3.00E-141 |
| PR-7 | Potri.001G468800.1 | 7.00E-139 |
| PR-7 | Potri.015G133800.1 | 2.00E-136 |
| PR-7 | Potri.007G102100.1 | 1.00E-135 |
| PR-7 | Potri.005G067200.1 | 2.00E-133 |
| PR-7 | Potri.011G050000.1 | 1.00E-132 |

|      |                    |           |
|------|--------------------|-----------|
| PR-7 | Potri.007G102200.1 | 3.00E-132 |
| PR-7 | Potri.007G102300.1 | 9.00E-132 |
| PR-7 | Potri.001G455800.1 | 1.00E-131 |
| PR-7 | Potri.001G450600.1 | 6.00E-131 |
| PR-7 | Potri.010G196700.1 | 4.00E-130 |
| PR-7 | Potri.001G468900.1 | 1.00E-129 |
| PR-7 | Potri.007G045100.1 | 7.00E-129 |
| PR-7 | Potri.011G146300.1 | 5.00E-127 |
| PR-7 | Potri.011G076700.1 | 6.00E-127 |
| PR-7 | Potri.011G050100.1 | 1.00E-126 |
| PR-7 | Potri.011G150900.1 | 5.00E-126 |
| PR-7 | Potri.010G196800.1 | 3.00E-125 |
| PR-7 | Potri.006G001600.1 | 3.00E-125 |
| PR-7 | Potri.004G161400.1 | 5.00E-125 |
| PR-7 | Potri.009G100500.1 | 1.00E-124 |
| PR-7 | Potri.006G114500.1 | 1.00E-124 |
| PR-7 | Potri.011G151200.1 | 2.00E-122 |
| PR-7 | Potri.002G124500.1 | 2.00E-122 |
| PR-7 | Potri.011G050300.1 | 3.00E-122 |
| PR-7 | Potri.005G243000.1 | 2.00E-120 |
| PR-7 | Potri.014G026600.1 | 2.00E-120 |
| PR-7 | Potri.011G050200.1 | 3.00E-120 |
| PR-7 | Potri.002G018600.1 | 2.00E-119 |
| PR-7 | Potri.014G026700.1 | 3.00E-119 |
| PR-7 | Potri.009G038000.1 | 1.00E-117 |
| PR-7 | Potri.010G196600.1 | 2.00E-116 |
| PR-7 | Potri.012G133200.1 | 3.00E-116 |
| PR-7 | Potri.010G196900.1 | 1.00E-115 |
| PR-7 | Potri.014G026500.1 | 3.00E-115 |
| PR-7 | Potri.003G120100.1 | 2.00E-114 |
| PR-7 | Potri.014G074500.1 | 2.00E-113 |
| PR-7 | Potri.018G094400.1 | 2.00E-111 |
| PR-7 | Potri.003G189200.1 | 7.00E-111 |
| PR-7 | Potri.009G037900.1 | 1.00E-105 |
| PR-7 | Potri.002G151900.1 | 1.00E-104 |
| PR-7 | Potri.006G141200.1 | 3.00E-100 |
| PR-7 | Potri.009G144500.1 | 3.00E-99  |
| PR-7 | Potri.001G002200.1 | 1.00E-85  |
| PR-7 | Potri.006G076200.1 | 5.00E-78  |
| PR-7 | Potri.004G184600.1 | 1.00E-77  |
| PR-7 | Potri.001G440300.1 | 6.00E-77  |

|      |                    |           |
|------|--------------------|-----------|
| PR-7 | Potri.001G151100.1 | 2.00E-76  |
| PR-7 | Potri.011G155400.1 | 6.00E-75  |
| PR-7 | Potri.014G193200.1 | 1.00E-74  |
| PR-7 | Potri.018G143400.1 | 4.00E-74  |
| PR-7 | Potri.002G152000.1 | 4.00E-65  |
| PR-8 | Potri.015G024100.1 | 1.00E-131 |
| PR-8 | Potri.015G024000.1 | 3.00E-131 |
| PR-8 | Potri.015G023900.1 | 2.00E-128 |
| PR-8 | Potri.002G165700.1 | 5.00E-110 |
| PR-8 | Potri.014G091700.1 | 1.00E-109 |
| PR-8 | Potri.015G024200.1 | 1.00E-105 |
| PR-8 | Potri.002G242000.1 | 3.00E-105 |
| PR-8 | Potri.012G033900.1 | 7.00E-103 |
| PR-8 | Potri.014G091600.1 | 8.00E-103 |
| PR-8 | Potri.014G092800.1 | 2.00E-88  |
| PR-8 | Potri.014G092900.1 | 1.00E-82  |
| PR-8 | Potri.014G093000.1 | 2.00E-22  |
| PR-9 | Potri.001G011500.1 | 9.00E-142 |
| PR-9 | Potri.003G214800.1 | 4.00E-139 |
| PR-9 | Potri.003G214700.1 | 5.00E-139 |
| PR-9 | Potri.016G058200.1 | 4.00E-130 |
| PR-9 | Potri.001G011200.1 | 1.00E-122 |
| PR-9 | Potri.001G011300.1 | 7.00E-122 |
| PR-9 | Potri.003G214900.1 | 1.00E-121 |
| PR-9 | Potri.001G013000.1 | 1.00E-121 |
| PR-9 | Potri.001G011000.1 | 1.00E-121 |
| PR-9 | Potri.003G214500.1 | 2.00E-107 |
| PR-9 | Potri.003G215000.1 | 8.00E-102 |
| PR-9 | Potri.007G019300.1 | 6.00E-100 |
| PR-9 | Potri.005G118700.1 | 7.00E-99  |
| PR-9 | Potri.013G083600.1 | 3.00E-97  |
| PR-9 | Potri.013G154400.1 | 1.00E-96  |
| PR-9 | Potri.014G143200.1 | 2.00E-96  |
| PR-9 | Potri.T160000.1    | 2.00E-96  |
| PR-9 | Potri.008G022700.1 | 4.00E-96  |
| PR-9 | Potri.008G022600.1 | 2.00E-95  |
| PR-9 | Potri.T160100.1    | 4.00E-95  |
| PR-9 | Potri.T163200.1    | 7.00E-95  |
| PR-9 | Potri.001G458900.1 | 4.00E-92  |
| PR-9 | Potri.016G132700.1 | 1.00E-91  |
| PR-9 | Potri.010G236900.1 | 6.00E-91  |

|      |                    |          |
|------|--------------------|----------|
| PR-9 | Potri.001G458700.1 | 1.00E-90 |
| PR-9 | Potri.T163000.1    | 3.00E-90 |
| PR-9 | Potri.005G135300.1 | 3.00E-90 |
| PR-9 | Potri.002G031200.1 | 4.00E-90 |
| PR-9 | Potri.T163100.1    | 8.00E-89 |
| PR-9 | Potri.013G156800.1 | 2.00E-88 |
| PR-9 | Potri.008G103200.1 | 1.00E-87 |
| PR-9 | Potri.013G156400.1 | 1.00E-85 |
| PR-9 | Potri.011G027300.1 | 3.00E-85 |
| PR-9 | Potri.004G144600.1 | 1.00E-84 |
| PR-9 | Potri.004G023200.1 | 1.00E-84 |
| PR-9 | Potri.013G156500.1 | 3.00E-84 |
| PR-9 | Potri.009G106400.1 | 4.00E-84 |
| PR-9 | Potri.010G134500.1 | 1.00E-83 |
| PR-9 | Potri.T099300.1    | 1.00E-83 |
| PR-9 | Potri.016G132900.1 | 2.00E-83 |
| PR-9 | Potri.019G063200.1 | 3.00E-83 |
| PR-9 | Potri.008G110600.1 | 4.00E-83 |
| PR-9 | Potri.006G069600.1 | 8.00E-83 |
| PR-9 | Potri.004G023100.1 | 2.00E-82 |
| PR-9 | Potri.016G132800.1 | 2.00E-82 |
| PR-9 | Potri.018G131600.1 | 4.00E-81 |
| PR-9 | Potri.001G145800.1 | 6.00E-81 |
| PR-9 | Potri.006G107000.1 | 2.00E-80 |
| PR-9 | Potri.005G072800.1 | 2.00E-80 |
| PR-9 | Potri.017G038100.1 | 4.00E-80 |
| PR-9 | Potri.005G108900.1 | 1.00E-79 |
| PR-9 | Potri.007G122100.1 | 9.00E-79 |
| PR-9 | Potri.002G065300.1 | 1.00E-78 |
| PR-9 | Potri.007G096200.1 | 2.00E-78 |
| PR-9 | Potri.017G037900.1 | 3.00E-77 |
| PR-9 | Potri.005G195600.1 | 4.00E-76 |
| PR-9 | Potri.012G042800.1 | 4.00E-76 |
| PR-9 | Potri.016G058800.1 | 6.00E-76 |
| PR-9 | Potri.016G125000.1 | 2.00E-73 |
| PR-9 | Potri.010G175100.1 | 4.00E-73 |
| PR-9 | Potri.005G195700.1 | 2.00E-72 |
| PR-9 | Potri.001G182400.1 | 2.00E-72 |
| PR-9 | Potri.004G134800.1 | 7.00E-72 |
| PR-9 | Potri.003G156100.1 | 8.00E-71 |
| PR-9 | Potri.002G018000.1 | 9.00E-71 |

|       |                    |          |
|-------|--------------------|----------|
| PR-9  | Potri.007G122200.1 | 1.00E-70 |
| PR-9  | Potri.017G064100.1 | 4.00E-70 |
| PR-9  | Potri.007G122300.1 | 7.00E-69 |
| PR-9  | Potri.018G089900.1 | 2.00E-68 |
| PR-9  | Potri.007G074700.1 | 7.00E-68 |
| PR-9  | Potri.010G036100.1 | 1.00E-67 |
| PR-9  | Potri.T045500.1    | 3.00E-67 |
| PR-9  | Potri.015G003500.1 | 3.00E-67 |
| PR-9  | Potri.015G003600.1 | 3.00E-66 |
| PR-9  | Potri.007G053400.1 | 2.00E-65 |
| PR-9  | Potri.004G052100.1 | 4.00E-65 |
| PR-9  | Potri.011G062300.1 | 5.00E-65 |
| PR-9  | Potri.001G329200.1 | 6.00E-65 |
| PR-9  | Potri.001G351000.1 | 1.00E-64 |
| PR-9  | Potri.007G132800.1 | 1.00E-63 |
| PR-9  | Potri.015G110200.1 | 1.00E-61 |
| PR-9  | Potri.T089600.1    | 1.00E-61 |
| PR-9  | Potri.018G136900.1 | 1.00E-60 |
| PR-9  | Potri.018G015500.1 | 2.00E-60 |
| PR-9  | Potri.012G076500.1 | 3.00E-60 |
| PR-9  | Potri.013G066800.1 | 5.00E-60 |
| PR-9  | Potri.006G267400.1 | 2.00E-59 |
| PR-9  | Potri.007G067200.1 | 3.00E-58 |
| PR-9  | Potri.001G218600.1 | 1.00E-55 |
| PR-9  | Potri.001G218500.1 | 2.00E-55 |
| PR-9  | Potri.006G129900.1 | 8.00E-54 |
| PR-10 | Potri.010G000600.1 | 6.00E-45 |
| PR-10 | Potri.011G026000.1 | 9.00E-44 |
| PR-10 | Potri.008G212100.1 | 3.00E-43 |
| PR-10 | Potri.011G025900.1 | 9.00E-43 |
| PR-10 | Potri.011G026100.1 | 1.00E-42 |
| PR-10 | Potri.011G026200.1 | 5.00E-42 |
| PR-10 | Potri.008G212500.1 | 1.00E-41 |
| PR-10 | Potri.014G152800.1 | 2.00E-41 |
| PR-10 | Potri.008G212400.1 | 8.00E-41 |
| PR-10 | Potri.004G021100.1 | 9.00E-41 |
| PR-10 | Potri.010G000400.1 | 1.00E-40 |
| PR-10 | Potri.T111200.1    | 2.00E-40 |
| PR-10 | Potri.010G000200.1 | 2.00E-39 |
| PR-10 | Potri.016G046500.1 | 3.00E-39 |
| PR-10 | Potri.008G213100.1 | 7.00E-39 |

|       |                    |           |
|-------|--------------------|-----------|
| PR-10 | Potri.008G212700.1 | 8.00E-38  |
| PR-10 | Potri.008G212600.1 | 4.00E-35  |
| PR-10 | Potri.010G000500.1 | 4.00E-32  |
| PR-10 | Potri.008G212300.1 | 2.00E-29  |
| PR-10 | Potri.008G212800.1 | 2.00E-26  |
| PR-10 | Potri.004G032900.1 | 4.00E-20  |
| PR-10 | Potri.004G033000.1 | 1.00E-19  |
| PR-11 | Potri.006G188300.1 | 1.00E-146 |
| PR-11 | Potri.006G188400.1 | 4.00E-138 |
| PR-11 | Potri.018G111600.1 | 1.00E-98  |
| PR-11 | Potri.018G111900.1 | 8.00E-95  |
| PR-11 | Potri.018G112000.1 | 3.00E-90  |
| PR-11 | Potri.018G112100.1 | 1.00E-88  |
| PR-11 | Potri.018G111700.1 | 9.00E-86  |
| PR-11 | Potri.006G261800.1 | 1.00E-85  |
| PR-11 | Potri.018G111800.1 | 1.00E-58  |
| PR-14 | Potri.001G232900.1 | 1.00E-21  |
| PR-14 | Potri.001G232700.1 | 4.00E-21  |
| PR-14 | Potri.004G086600.1 | 8.00E-20  |
| PR-14 | Potri.004G086500.1 | 8.00E-19  |
| PR-14 | Potri.009G025200.1 | 6.00E-17  |
| PR-14 | Potri.T132400.1    | 6.00E-17  |
| PR-14 | Potri.016G136000.1 | 6.00E-17  |
| PR-14 | Potri.016G135400.1 | 9.00E-17  |
| PR-14 | Potri.016G135800.1 | 5.00E-16  |
| PR-14 | Potri.014G046500.1 | 5.00E-15  |
| PR-14 | Potri.016G135700.1 | 2.00E-14  |
| PR-14 | Potri.006G108100.1 | 6.00E-14  |
| PR-14 | Potri.016G135500.1 | 2.00E-13  |
| PR-14 | Potri.014G098000.1 | 8.00E-11  |
| PR-14 | Potri.011G021900.1 | 6.00E-09  |
| PR-16 | Potri.015G068200.1 | 8.00E-65  |
| PR-16 | Potri.005G001300.1 | 1.00E-59  |
| PR-16 | Potri.011G163300.1 | 9.00E-59  |
| PR-16 | Potri.013G052300.1 | 2.00E-58  |
| PR-16 | Potri.T151800.1    | 3.00E-58  |
| PR-16 | Potri.013G052100.1 | 6.00E-58  |
| PR-16 | Potri.013G052000.1 | 7.00E-58  |
| PR-16 | Potri.013G051700.1 | 2.00E-57  |
| PR-16 | Potri.011G163800.1 | 3.00E-57  |
| PR-16 | Potri.013G051600.1 | 4.00E-57  |

|       |                    |          |
|-------|--------------------|----------|
| PR-16 | Potri.011G163200.1 | 8.00E-57 |
| PR-16 | Potri.001G465100.1 | 9.00E-57 |
| PR-16 | Potri.011G162200.1 | 1.00E-56 |
| PR-16 | Potri.014G110400.1 | 2.00E-55 |
| PR-16 | Potri.013G064100.1 | 1.00E-54 |
| PR-16 | Potri.013G000500.1 | 1.00E-54 |
| PR-16 | Potri.002G184900.1 | 1.00E-54 |
| PR-16 | Potri.013G063000.1 | 2.00E-54 |
| PR-16 | Potri.013G063800.1 | 2.00E-54 |
| PR-16 | Potri.013G063600.1 | 2.00E-54 |
| PR-16 | Potri.013G063700.1 | 2.00E-54 |
| PR-16 | Potri.013G063900.1 | 2.00E-54 |
| PR-16 | Potri.013G063500.1 | 2.00E-54 |
| PR-16 | Potri.013G064000.1 | 2.00E-54 |
| PR-16 | Potri.013G063200.1 | 2.00E-54 |
| PR-16 | Potri.013G063100.1 | 6.00E-54 |
| PR-16 | Potri.T151900.1    | 9.00E-54 |
| PR-16 | Potri.019G026400.1 | 3.00E-53 |
| PR-16 | Potri.013G063300.1 | 6.00E-53 |
| PR-16 | Potri.019G026700.1 | 1.00E-52 |
| PR-16 | Potri.019G026000.1 | 1.00E-52 |
| PR-16 | Potri.019G025800.1 | 1.00E-52 |
| PR-16 | Potri.019G025900.1 | 1.00E-52 |
| PR-16 | Potri.T056300.1    | 2.00E-52 |
| PR-16 | Potri.019G026200.1 | 3.00E-52 |
| PR-16 | Potri.019G026500.1 | 4.00E-52 |
| PR-16 | Potri.013G051900.1 | 3.00E-51 |
| PR-16 | Potri.001G464000.1 | 4.00E-51 |
| PR-16 | Potri.001G464100.1 | 8.00E-51 |
| PR-16 | Potri.011G162600.1 | 1.00E-49 |
| PR-16 | Potri.013G051800.1 | 1.00E-48 |
| PR-16 | Potri.009G140400.1 | 2.00E-48 |
| PR-16 | Potri.004G180100.1 | 2.00E-48 |
| PR-16 | Potri.004G179800.1 | 2.00E-48 |
| PR-16 | Potri.004G179900.1 | 2.00E-48 |
| PR-16 | Potri.013G063400.1 | 1.00E-47 |

|       |                    |           |
|-------|--------------------|-----------|
| PR-16 | Potri.004G180000.1 | 2.00E-46  |
| PR-16 | Potri.004G180200.1 | 2.00E-46  |
| PR-16 | Potri.001G464500.1 | 2.00E-46  |
| PR-16 | Potri.008G020800.1 | 5.00E-44  |
| PR-16 | Potri.010G038200.1 | 9.00E-40  |
| PR-16 | Potri.013G141900.1 | 4.00E-35  |
| PR-16 | Potri.003G065300.1 | 4.00E-35  |
| PR-16 | Potri.012G111500.1 | 1.00E-34  |
| PR-16 | Potri.010G238100.1 | 2.00E-34  |
| PR-16 | Potri.010G238200.1 | 2.00E-34  |
| PR-16 | Potri.001G169000.1 | 2.00E-34  |
| PR-16 | Potri.006G142600.1 | 3.00E-33  |
| PR-16 | Potri.015G109600.1 | 7.00E-33  |
| PR-16 | Potri.019G026100.1 | 9.00E-31  |
| PR-16 | Potri.T055000.1    | 4.00E-29  |
| PR-16 | Potri.019G029300.1 | 2.00E-28  |
| PR-16 | Potri.008G016700.1 | 8.00E-28  |
| PR-16 | Potri.004G194600.1 | 1.00E-26  |
| PR-16 | Potri.010G240700.1 | 4.00E-26  |
| PR-16 | Potri.008G084300.1 | 6.00E-26  |
| PR-16 | Potri.010G240500.1 | 2.00E-24  |
| PR-16 | Potri.009G157100.1 | 2.00E-24  |
| PR-16 | Potri.010G240600.1 | 5.00E-24  |
| PR-16 | Potri.019G026800.1 | 2.00E-23  |
| PR-16 | Potri.008G016500.1 | 6.00E-14  |
| PR-16 | Potri.013G116500.1 | 2.00E-12  |
| PR-16 | Potri.008G016600.1 | 7.00E-07  |
| PR-16 | Potri.001G464600.1 | 1.00E-05  |
| PR-17 | Potri.009G094600.1 | 3.00E-111 |
| PR-17 | Potri.001G299500.1 | 3.00E-111 |
| PR-17 | Potri.001G299400.1 | 3.00E-107 |
| PR-17 | Potri.001G299600.1 | 1.00E-103 |
| PR-17 | Potri.009G094500.1 | 2.00E-93  |
| PR-17 | Potri.009G094700.1 | 7.00E-87  |
| PR-17 | Potri.005G202300.1 | 8.00E-09  |
