# Supplementary material for: Theobroma cacao L. pathogenesis-related gene tandem array members show diverse expression dynamics in response to pathogen colonization
Source: PubMed Central journal article supplement (PMC4869279; doi:10.1186/s12864-016-2693-3), 2016-05-17
Supplement: 12864_2016_2693_MOESM8_ESM.pdf [file 12864_2016_2693_MOESM8_ESM.pdf]

| <b>Supplemental Table S8 - Gene IDs and BLASTp E-value for <i>Vitis vinifera</i> PR genes</b> |                   |                |
|-----------------------------------------------------------------------------------------------|-------------------|----------------|
| <b>PR Gene Class</b>                                                                          | <b>Gene ID</b>    | <b>E-value</b> |
| PR-1                                                                                          | GSVIVT01037000001 | 4.00E-53       |
| PR-1                                                                                          | GSVIVT01037005001 | 1.00E-51       |
| PR-1                                                                                          | GSVIVT01036997001 | 1.00E-49       |
| PR-1                                                                                          | GSVIVT01037008001 | 1.00E-49       |
| PR-1                                                                                          | GSVIVT01038540001 | 2.00E-49       |
| PR-1                                                                                          | GSVIVT01037015001 | 1.00E-43       |
| PR-1                                                                                          | GSVIVT01036993001 | 1.00E-40       |
| PR-1                                                                                          | GSVIVT01037011001 | 1.00E-40       |
| PR-1                                                                                          | GSVIVT01029124001 | 6.00E-40       |
| PR-1                                                                                          | GSVIVT01025577001 | 8.00E-40       |
| PR-1                                                                                          | GSVIVT01003762001 | 3.00E-28       |
| PR-1                                                                                          | GSVIVT01037014001 | 6.00E-19       |
| PR-1                                                                                          | GSVIVT01003765001 | 2.00E-06       |
| PR-2                                                                                          | GSVIVT01031542001 | 1.00E-77       |
| PR-2                                                                                          | GSVIVT01033545001 | 5.00E-76       |
| PR-2                                                                                          | GSVIVT01033542001 | 6.00E-75       |
| PR-2                                                                                          | GSVIVT01013131001 | 6.00E-67       |
| PR-2                                                                                          | GSVIVT01015282001 | 2.00E-61       |
| PR-2                                                                                          | GSVIVT01033536001 | 4.00E-60       |
| PR-2                                                                                          | GSVIVT01017331001 | 1.00E-55       |
| PR-2                                                                                          | GSVIVT01037711001 | 4.00E-54       |
| PR-2                                                                                          | GSVIVT01031959001 | 7.00E-54       |
| PR-2                                                                                          | GSVIVT01021499001 | 8.00E-54       |
| PR-2                                                                                          | GSVIVT01035013001 | 5.00E-53       |
| PR-2                                                                                          | GSVIVT01033538001 | 7.00E-53       |
| PR-2                                                                                          | GSVIVT01038583001 | 1.00E-52       |
| PR-2                                                                                          | GSVIVT01011682001 | 3.00E-52       |
| PR-2                                                                                          | GSVIVT01030716001 | 9.00E-52       |
| PR-2                                                                                          | GSVIVT01036124001 | 1.00E-51       |
| PR-2                                                                                          | GSVIVT01009700001 | 1.00E-50       |
| PR-2                                                                                          | GSVIVT01024956001 | 5.00E-50       |

|      |                   |          |
|------|-------------------|----------|
| PR-2 | GSVIVT01012711001 | 3.00E-48 |
| PR-2 | GSVIVT01022253001 | 4.00E-48 |
| PR-2 | GSVIVT01013401001 | 1.00E-46 |
| PR-2 | GSVIVT01031698001 | 1.00E-46 |
| PR-2 | GSVIVT01034245001 | 3.00E-46 |
| PR-2 | GSVIVT01033384001 | 4.00E-44 |
| PR-2 | GSVIVT01015563001 | 1.00E-42 |
| PR-2 | GSVIVT01031544001 | 2.00E-41 |
| PR-2 | GSVIVT01030073001 | 3.00E-40 |
| PR-2 | GSVIVT01016553001 | 6.00E-40 |
| PR-2 | GSVIVT01019678001 | 4.00E-39 |
| PR-2 | GSVIVT01016379001 | 9.00E-39 |
| PR-2 | GSVIVT01033540001 | 2.00E-36 |
| PR-2 | GSVIVT01015435001 | 7.00E-36 |
| PR-2 | GSVIVT01014995001 | 4.00E-35 |
| PR-2 | GSVIVT01031543001 | 3.00E-30 |
| PR-2 | GSVIVT01030503001 | 6.00E-30 |
| PR-2 | GSVIVT01002584001 | 8.00E-30 |
| PR-2 | GSVIVT01033543001 | 6.00E-27 |
| PR-2 | GSVIVT01031619001 | 3.00E-25 |
| PR-2 | GSVIVT01015616001 | 1.00E-11 |
| PR-2 | GSVIVT01025431001 | 3.00E-11 |
| PR-2 | GSVIVT01000128001 | 3.00E-08 |
| PR-2 | GSVIVT01017294001 | 3.00E-06 |
| PR-3 | GSVIVT01007190001 | 1.00E-69 |
| PR-3 | GSVIVT01038126001 | 8.00E-30 |
| PR-3 | GSVIVT01038114001 | 1.00E-29 |
| PR-3 | GSVIVT01028243001 | 3.00E-28 |
| PR-3 | GSVIVT01038125001 | 8.00E-28 |
| PR-3 | GSVIVT01038113001 | 1.00E-27 |
| PR-3 | GSVIVT01038117001 | 1.00E-27 |
| PR-3 | GSVIVT01038111001 | 2.00E-27 |
| PR-3 | GSVIVT01038116001 | 4.00E-27 |
| PR-3 | GSVIVT01038120001 | 1.00E-25 |
| PR-3 | GSVIVT01038108001 | 6.00E-25 |

|      |                   |           |
|------|-------------------|-----------|
| PR-3 | GSVIVT01035029001 | 2.00E-23  |
| PR-3 | GSVIVT01031685001 | 1.00E-22  |
| PR-4 | GSVIVT01036278001 | 1.00E-48  |
| PR-4 | GSVIVT01036279001 | 7.00E-48  |
| PR-4 | GSVIVT01036281001 | 7.00E-16  |
| PR-5 | GSVIVT01008423001 | 7.00E-73  |
| PR-5 | GSVIVT01032051001 | 4.00E-70  |
| PR-5 | GSVIVT01018767001 | 1.00E-69  |
| PR-5 | GSVIVT01009930001 | 1.00E-67  |
| PR-5 | GSVIVT01024050001 | 2.00E-67  |
| PR-5 | GSVIVT01027712001 | 1.00E-65  |
| PR-5 | GSVIVT01018769001 | 2.00E-65  |
| PR-5 | GSVIVT01009928001 | 2.00E-64  |
| PR-5 | GSVIVT01038679001 | 6.00E-64  |
| PR-5 | GSVIVT01024052001 | 1.00E-61  |
| PR-5 | GSVIVT01033694001 | 4.00E-60  |
| PR-5 | GSVIVT01016504001 | 5.00E-58  |
| PR-5 | GSVIVT01034131001 | 2.00E-56  |
| PR-5 | GSVIVT01008918001 | 4.00E-55  |
| PR-5 | GSVIVT01022993001 | 3.00E-54  |
| PR-5 | GSVIVT01009646001 | 2.00E-38  |
| PR-5 | GSVIVT01032560001 | 1.00E-34  |
| PR-5 | GSVIVT01019840001 | 4.00E-27  |
| PR-5 | GSVIVT01019849001 | 7.00E-21  |
| PR-5 | GSVIVT01019835001 | 4.00E-14  |
| PR-5 | GSVIVT01019848001 | 8.00E-10  |
| PR-5 | GSVIVT01019838001 | 2.00E-06  |
| PR-5 | GSVIVT01019836001 | 7.00E-06  |
| PR-6 | GSVIVT01018137001 | 3.00E-13  |
| PR-6 | GSVIVT01018139001 | 8.00E-13  |
| PR-6 | GSVIVT01018142001 | 2.00E-10  |
| PR-6 | GSVIVT01018141001 | 4.00E-09  |
| PR-6 | GSVIVT01032743001 | 1.00E-08  |
| PR-7 | GSVIVT01028435001 | 7.00E-138 |
| PR-7 | GSVIVT01024042001 | 2.00E-134 |
| PR-7 | GSVIVT01028051001 | 2.00E-126 |
| PR-7 | GSVIVT01006970001 | 3.00E-122 |
| PR-7 | GSVIVT01030138001 | 4.00E-122 |
| PR-7 | GSVIVT01014788001 | 2.00E-119 |
| PR-7 | GSVIVT01019901001 | 3.00E-119 |
| PR-7 | GSVIVT01015069001 | 4.00E-118 |

|      |                   |           |
|------|-------------------|-----------|
| PR-7 | GSVIVT01006972001 | 2.00E-117 |
| PR-7 | GSVIVT01016448001 | 1.00E-114 |
| PR-7 | GSVIVT01019687001 | 2.00E-114 |
| PR-7 | GSVIVT01009471001 | 3.00E-114 |
| PR-7 | GSVIVT01006968001 | 4.00E-114 |
| PR-7 | GSVIVT01009968001 | 3.00E-112 |
| PR-7 | GSVIVT01016449001 | 5.00E-112 |
| PR-7 | GSVIVT01026420001 | 9.00E-112 |
| PR-7 | GSVIVT01016446001 | 1.00E-111 |
| PR-7 | GSVIVT01016452001 | 1.00E-111 |
| PR-7 | GSVIVT01016456001 | 7.00E-111 |
| PR-7 | GSVIVT01016447001 | 4.00E-110 |
| PR-7 | GSVIVT01016439001 | 3.00E-109 |
| PR-7 | GSVIVT01027586001 | 4.00E-109 |
| PR-7 | GSVIVT01019877001 | 7.00E-109 |
| PR-7 | GSVIVT01019919001 | 3.00E-108 |
| PR-7 | GSVIVT01016455001 | 4.00E-107 |
| PR-7 | GSVIVT01027368001 | 1.00E-106 |
| PR-7 | GSVIVT01033810001 | 5.00E-106 |
| PR-7 | GSVIVT01016451001 | 7.00E-106 |
| PR-7 | GSVIVT01027583001 | 3.00E-105 |
| PR-7 | GSVIVT01038642001 | 7.00E-105 |
| PR-7 | GSVIVT01038641001 | 1.00E-104 |
| PR-7 | GSVIVT01016443001 | 5.00E-104 |
| PR-7 | GSVIVT01010670001 | 1.00E-103 |
| PR-7 | GSVIVT01024856001 | 3.00E-103 |
| PR-7 | GSVIVT01038620001 | 2.00E-102 |
| PR-7 | GSVIVT01010668001 | 3.00E-102 |
| PR-7 | GSVIVT01036167001 | 9.00E-102 |
| PR-7 | GSVIVT01018437001 | 1.00E-101 |
| PR-7 | GSVIVT01016682001 | 1.00E-100 |
| PR-7 | GSVIVT01021320001 | 1.00E-100 |
| PR-7 | GSVIVT01018442001 | 2.00E-100 |
| PR-7 | GSVIVT01024195001 | 4.00E-100 |
| PR-7 | GSVIVT01019686001 | 6.00E-99  |
| PR-7 | GSVIVT01024859001 | 2.00E-98  |
| PR-7 | GSVIVT01037483001 | 3.00E-98  |
| PR-7 | GSVIVT01024948001 | 3.00E-96  |
| PR-7 | GSVIVT01024857001 | 6.00E-96  |
| PR-7 | GSVIVT01018438001 | 4.00E-93  |
| PR-7 | GSVIVT01016735001 | 6.00E-93  |

|      |                   |           |
|------|-------------------|-----------|
| PR-7 | GSVIVT01025493001 | 6.00E-93  |
| PR-7 | GSVIVT01016445001 | 4.00E-92  |
| PR-7 | GSVIVT01037485001 | 1.00E-90  |
| PR-7 | GSVIVT01002783001 | 3.00E-89  |
| PR-7 | GSVIVT01016442001 | 2.00E-88  |
| PR-7 | GSVIVT01031724001 | 1.00E-87  |
| PR-7 | GSVIVT01031725001 | 1.00E-83  |
| PR-7 | GSVIVT01006973001 | 1.00E-81  |
| PR-7 | GSVIVT01019899001 | 3.00E-81  |
| PR-7 | GSVIVT01000156001 | 6.00E-81  |
| PR-7 | GSVIVT01031723001 | 2.00E-76  |
| PR-7 | GSVIVT01010871001 | 3.00E-73  |
| PR-7 | GSVIVT01037948001 | 3.00E-70  |
| PR-7 | GSVIVT01009472001 | 4.00E-70  |
| PR-7 | GSVIVT01029534001 | 1.00E-67  |
| PR-7 | GSVIVT01004808001 | 9.00E-65  |
| PR-7 | GSVIVT01006971001 | 1.00E-50  |
| PR-7 | GSVIVT01024858001 | 1.00E-26  |
| PR-8 | GSVIVT01027027001 | 1.00E-85  |
| PR-8 | GSVIVT01032411001 | 5.00E-81  |
| PR-8 | GSVIVT01027012001 | 9.00E-77  |
| PR-8 | GSVIVT01028750001 | 8.00E-73  |
| PR-8 | GSVIVT01028752001 | 7.00E-71  |
| PR-8 | GSVIVT01027026001 | 1.00E-67  |
| PR-8 | GSVIVT01027014001 | 2.00E-64  |
| PR-8 | GSVIVT01027013001 | 5.00E-63  |
| PR-8 | GSVIVT01027022001 | 3.00E-49  |
| PR-8 | GSVIVT01027016001 | 3.00E-35  |
| PR-8 | GSVIVT01028753001 | 6.00E-31  |
| PR-9 | GSVIVT01025373001 | 9.00E-114 |
| PR-9 | GSVIVT01033484001 | 4.00E-105 |
| PR-9 | GSVIVT01020737001 | 5.00E-79  |
| PR-9 | GSVIVT01024596001 | 1.00E-75  |
| PR-9 | GSVIVT01010271001 | 3.00E-75  |
| PR-9 | GSVIVT01031801001 | 5.00E-74  |
| PR-9 | GSVIVT01030221001 | 8.00E-74  |
| PR-9 | GSVIVT01010269001 | 4.00E-72  |
| PR-9 | GSVIVT01024600001 | 5.00E-71  |
| PR-9 | GSVIVT01009106001 | 2.00E-70  |
| PR-9 | GSVIVT01013238001 | 4.00E-70  |
| PR-9 | GSVIVT01015533001 | 6.00E-70  |

|      |                   |          |
|------|-------------------|----------|
| PR-9 | GSVIVT01010168001 | 1.00E-69 |
| PR-9 | GSVIVT01010272001 | 5.00E-67 |
| PR-9 | GSVIVT01010267001 | 2.00E-66 |
| PR-9 | GSVIVT01003417001 | 3.00E-66 |
| PR-9 | GSVIVT01010270001 | 3.00E-66 |
| PR-9 | GSVIVT01034967001 | 3.00E-66 |
| PR-9 | GSVIVT01015537001 | 4.00E-66 |
| PR-9 | GSVIVT01030219001 | 2.00E-65 |
| PR-9 | GSVIVT01009107001 | 7.00E-65 |
| PR-9 | GSVIVT01010268001 | 3.00E-64 |
| PR-9 | GSVIVT01010664001 | 3.00E-64 |
| PR-9 | GSVIVT01018436001 | 3.00E-64 |
| PR-9 | GSVIVT01011017001 | 1.00E-63 |
| PR-9 | GSVIVT01026134001 | 1.00E-63 |
| PR-9 | GSVIVT01000248001 | 2.00E-61 |
| PR-9 | GSVIVT01017830001 | 7.00E-61 |
| PR-9 | GSVIVT01008763001 | 1.00E-60 |
| PR-9 | GSVIVT01031311001 | 1.00E-60 |
| PR-9 | GSVIVT01021152001 | 2.00E-60 |
| PR-9 | GSVIVT01030615001 | 5.00E-60 |
| PR-9 | GSVIVT01030616001 | 8.00E-60 |
| PR-9 | GSVIVT01010080001 | 1.00E-59 |
| PR-9 | GSVIVT01031312001 | 1.00E-59 |
| PR-9 | GSVIVT01004097001 | 3.00E-59 |
| PR-9 | GSVIVT01029748001 | 7.00E-58 |
| PR-9 | GSVIVT01009109001 | 1.00E-57 |
| PR-9 | GSVIVT01004088001 | 7.00E-57 |
| PR-9 | GSVIVT01005386001 | 8.00E-57 |
| PR-9 | GSVIVT01029241001 | 2.00E-56 |
| PR-9 | GSVIVT01007448001 | 4.00E-55 |
| PR-9 | GSVIVT01017084001 | 4.00E-55 |
| PR-9 | GSVIVT01028197001 | 3.00E-54 |
| PR-9 | GSVIVT01010266001 | 4.00E-54 |
| PR-9 | GSVIVT01018865001 | 3.00E-53 |
| PR-9 | GSVIVT01010156001 | 2.00E-52 |
| PR-9 | GSVIVT01009108001 | 5.00E-52 |
| PR-9 | GSVIVT01012624001 | 1.00E-51 |
| PR-9 | GSVIVT01038659001 | 2.00E-51 |
| PR-9 | GSVIVT01029771001 | 2.00E-50 |
| PR-9 | GSVIVT01036100001 | 8.00E-49 |
| PR-9 | GSVIVT01025365001 | 1.00E-48 |

|       |                   |          |
|-------|-------------------|----------|
| PR-9  | GSVIVT01033081001 | 4.00E-48 |
| PR-9  | GSVIVT01034984001 | 1.00E-46 |
| PR-9  | GSVIVT01025650001 | 9.00E-45 |
| PR-9  | GSVIVT01032715001 | 1.00E-44 |
| PR-9  | GSVIVT01024599001 | 4.00E-43 |
| PR-9  | GSVIVT01025374001 | 4.00E-41 |
| PR-9  | GSVIVT01009777001 | 6.00E-39 |
| PR-9  | GSVIVT01029774001 | 3.00E-36 |
| PR-9  | GSVIVT01020738001 | 9.00E-36 |
| PR-9  | GSVIVT01029776001 | 9.00E-36 |
| PR-9  | GSVIVT01036009001 | 1.00E-35 |
| PR-9  | GSVIVT01000144001 | 3.00E-35 |
| PR-9  | GSVIVT01029773001 | 3.00E-35 |
| PR-9  | GSVIVT01029775001 | 3.00E-35 |
| PR-9  | GSVIVT01010261001 | 1.00E-32 |
| PR-9  | GSVIVT01007225001 | 5.00E-32 |
| PR-9  | GSVIVT01034574001 | 2.00E-31 |
| PR-9  | GSVIVT01017829001 | 4.00E-28 |
| PR-9  | GSVIVT01012727001 | 1.00E-26 |
| PR-9  | GSVIVT01029778001 | 4.00E-21 |
| PR-9  | GSVIVT01015536001 | 9.00E-17 |
| PR-9  | GSVIVT01035858001 | 5.00E-14 |
| PR-9  | GSVIVT01033080001 | 4.00E-12 |
| PR-9  | GSVIVT01008846001 | 4.00E-10 |
| PR-9  | GSVIVT01025104001 | 4.00E-10 |
| PR-9  | GSVIVT01024035001 | 4.00E-09 |
| PR-10 | GSVIVT01035071001 | 1.00E-44 |
| PR-10 | GSVIVT01035072001 | 2.00E-42 |
| PR-10 | GSVIVT01035062001 | 8.00E-35 |
| PR-10 | GSVIVT01035055001 | 3.00E-34 |
| PR-10 | GSVIVT01035074001 | 3.00E-34 |
| PR-10 | GSVIVT01035076001 | 1.00E-33 |
| PR-10 | GSVIVT01035061001 | 2.00E-33 |
| PR-10 | GSVIVT01035060001 | 5.00E-33 |
| PR-10 | GSVIVT01035054001 | 6.00E-33 |
| PR-10 | GSVIVT01035059001 | 2.00E-32 |
| PR-10 | GSVIVT01035066001 | 3.00E-28 |
| PR-10 | GSVIVT01035069001 | 3.00E-28 |
| PR-10 | GSVIVT01035075001 | 9.00E-23 |
| PR-10 | GSVIVT01028061001 | 7.00E-22 |
| PR-10 | GSVIVT01028060001 | 4.00E-14 |

|       |                   |           |
|-------|-------------------|-----------|
| PR-10 | GSVIVT01035068001 | 2.00E-12  |
| PR-11 | GSVIVT01003718001 | 1.00E-119 |
| PR-11 | GSVIVT01001068001 | 3.00E-118 |
| PR-11 | GSVIVT01001074001 | 1.00E-101 |
| PR-11 | GSVIVT01001059001 | 3.00E-81  |
| PR-11 | GSVIVT01001064001 | 5.00E-81  |
| PR-11 | GSVIVT01007371001 | 3.00E-78  |
| PR-11 | GSVIVT01001058001 | 3.00E-76  |
| PR-11 | GSVIVT01001061001 | 1.00E-42  |
| PR-11 | GSVIVT01007373001 | 6.00E-23  |
| PR-14 | GSVIVT01030190001 | 9.00E-15  |
| PR-14 | GSVIVT01024563001 | 3.00E-14  |
| PR-14 | GSVIVT01006001001 | 1.00E-10  |
| PR-14 | GSVIVT01032682001 | 9.00E-10  |
| PR-14 | GSVIVT01021772001 | 4.00E-09  |
| PR-14 | GSVIVT01027088001 | 7.00E-06  |
| PR-16 | GSVIVT01030965001 | 5.00E-68  |
| PR-16 | GSVIVT01030968001 | 1.00E-67  |
| PR-16 | GSVIVT01030967001 | 3.00E-67  |
| PR-16 | GSVIVT01031079001 | 3.00E-67  |
| PR-16 | GSVIVT01000101001 | 4.00E-67  |
| PR-16 | GSVIVT01000102001 | 1.00E-66  |
| PR-16 | GSVIVT01000095001 | 2.00E-66  |
| PR-16 | GSVIVT01000098001 | 3.00E-66  |
| PR-16 | GSVIVT01000103001 | 2.00E-65  |
| PR-16 | GSVIVT01000097001 | 5.00E-65  |
| PR-16 | GSVIVT01000100001 | 5.00E-65  |
| PR-16 | GSVIVT01021705001 | 9.00E-65  |
| PR-16 | GSVIVT01013822001 | 1.00E-63  |
| PR-16 | GSVIVT01031080001 | 1.00E-63  |
| PR-16 | GSVIVT01031082001 | 3.00E-63  |
| PR-16 | GSVIVT01031085001 | 3.00E-63  |
| PR-16 | GSVIVT01000067001 | 8.00E-62  |
| PR-16 | GSVIVT01000070001 | 9.00E-62  |
| PR-16 | GSVIVT01000071001 | 9.00E-62  |
| PR-16 | GSVIVT01000063001 | 2.00E-61  |
| PR-16 | GSVIVT01021699001 | 2.00E-61  |
| PR-16 | GSVIVT01000068001 | 1.00E-60  |
| PR-16 | GSVIVT01000058001 | 1.00E-58  |
| PR-16 | GSVIVT01000060001 | 5.00E-57  |
| PR-16 | GSVIVT01000066001 | 2.00E-55  |

|       |                   |          |
|-------|-------------------|----------|
| PR-16 | GSVIVT01021700001 | 5.00E-55 |
| PR-16 | GSVIVT01000062001 | 7.00E-55 |
| PR-16 | GSVIVT01031351001 | 3.00E-46 |
| PR-16 | GSVIVT01028222001 | 4.00E-44 |
| PR-16 | GSVIVT01028220001 | 1.00E-40 |
| PR-16 | GSVIVT01020142001 | 4.00E-35 |
| PR-16 | GSVIVT01008094001 | 3.00E-34 |
| PR-16 | GSVIVT01000069001 | 8.00E-31 |
| PR-16 | GSVIVT01016761001 | 1.00E-25 |
| PR-16 | GSVIVT01036097001 | 1.00E-25 |

|       |                   |          |
|-------|-------------------|----------|
| PR-16 | GSVIVT01038545001 | 1.00E-25 |
| PR-16 | GSVIVT01000065001 | 6.00E-25 |
| PR-16 | GSVIVT01028588001 | 3.00E-23 |
| PR-16 | GSVIVT01028594001 | 3.00E-23 |
| PR-16 | GSVIVT01036098001 | 1.00E-22 |
| PR-16 | GSVIVT01025139001 | 7.00E-06 |
| PR-17 | GSVIVT01037910001 | 2.00E-89 |
| PR-17 | GSVIVT01037911001 | 8.00E-49 |
| PR-17 | GSVIVT01020876001 | 2.00E-09 |
