# Supplementary material for: Theobroma cacao L. pathogenesis-related gene tandem array members show diverse expression dynamics in response to pathogen colonization
Source: PubMed Central journal article supplement (PMC4869279; doi:10.1186/s12864-016-2693-3), 2016-05-17
Supplement: 12864_2016_2693_MOESM9_ESM.pdf [file 12864_2016_2693_MOESM9_ESM.pdf]

**Supplemental Table S9 - Percentage of PR family members in tandem arrays.**

|                                                                                                                                           | <i>T. cacao</i> | <i>B. distachyon</i> | <i>O. Sativa</i> | <i>A. thaliana</i> | <i>V. vinifera</i> | <i>P. trichocarpa</i> |
|-------------------------------------------------------------------------------------------------------------------------------------------|-----------------|----------------------|------------------|--------------------|--------------------|-----------------------|
| <b>PR-1</b>                                                                                                                               | 57.1            | 73.3                 | 92.3             | 54.5               | 61.5               | 47.4                  |
| <b>PR-2</b>                                                                                                                               | 11.6            | 23.7                 | 28.8             | 14.0               | 21.4               | 28.8                  |
| <b>PR-3</b>                                                                                                                               | 54.5            | 46.2                 | 56.3             | 42.9               | 69.2               | 71.4                  |
| <b>PR-4</b>                                                                                                                               | 75.0            | 100.0                | 100.0            | 0**                | 100.0              | 75.0                  |
| <b>PR-5</b>                                                                                                                               | 50.0            | 57.6                 | 51.4             | 29.2               | 52.2               | 56.0                  |
| <b>PR-6</b>                                                                                                                               | 87.5            | 60.0                 | 0.0              | 80.0               | 100.0              | 77.3                  |
| <b>PR-7</b>                                                                                                                               | 50.0            | 28.3                 | 39.7             | 56.0               | 53.7               | 42.9                  |
| <b>PR-8</b>                                                                                                                               | 71.4            | 71.4                 | 69.0             | 0**                | 90.9               | 75.0                  |
| <b>PR-9</b>                                                                                                                               | 40.7            | 67.8                 | 68.2             | 35.1               | 50.6               | 37.4                  |
| <b>PR-10</b>                                                                                                                              | 82.6            | 66.7                 | 50.0             | 0**                | 100.0              | 81.8                  |
| <b>PR-11</b>                                                                                                                              | 81.8            | 0**                  | 0.0              | 100.0              | 66.7               | 88.9                  |
| <b>PR-12</b>                                                                                                                              | 66.7            | NA*                  | NA*              | 57.1               | NA*                | NA*                   |
| <b>PR-13</b>                                                                                                                              | NA*             | 100.0                | 90.9             | 0*                 | NA*                | NA*                   |
| <b>PR-14</b>                                                                                                                              | 62.5            | 44.4                 | 52.9             | 53.8               | 0.0                | 60.0                  |
| <b>PR-15/16</b>                                                                                                                           | 52.6            | 56.8***              | 70.7***          | 66.7               | 80.5               | 70.3                  |
| <b>PR-17</b>                                                                                                                              | 100.0           | 0**                  | NA*              | 100.0              | 66.7               | 85.7                  |
| * No members of this family were identified in this species.                                                                              |                 |                      |                  |                    |                    |                       |
| ** There is only one member of the family for this species, so no tandem arrays can exist                                                 |                 |                      |                  |                    |                    |                       |
| *** Monocots have both PR-15s and PR-16s, which are distantly phylogenetically related. This percentage groups the two families together. |                 |                      |                  |                    |                    |                       |
