# Supplementary material for: Theobroma cacao L. pathogenesis-related gene tandem array members show diverse expression dynamics in response to pathogen colonization
Source: PubMed Central journal article supplement (PMC4869279; doi:10.1186/s12864-016-2693-3), 2016-05-17
Supplement: 12864_2016_2693_MOESM11_ESM.pdf [file 12864_2016_2693_MOESM11_ESM.pdf]

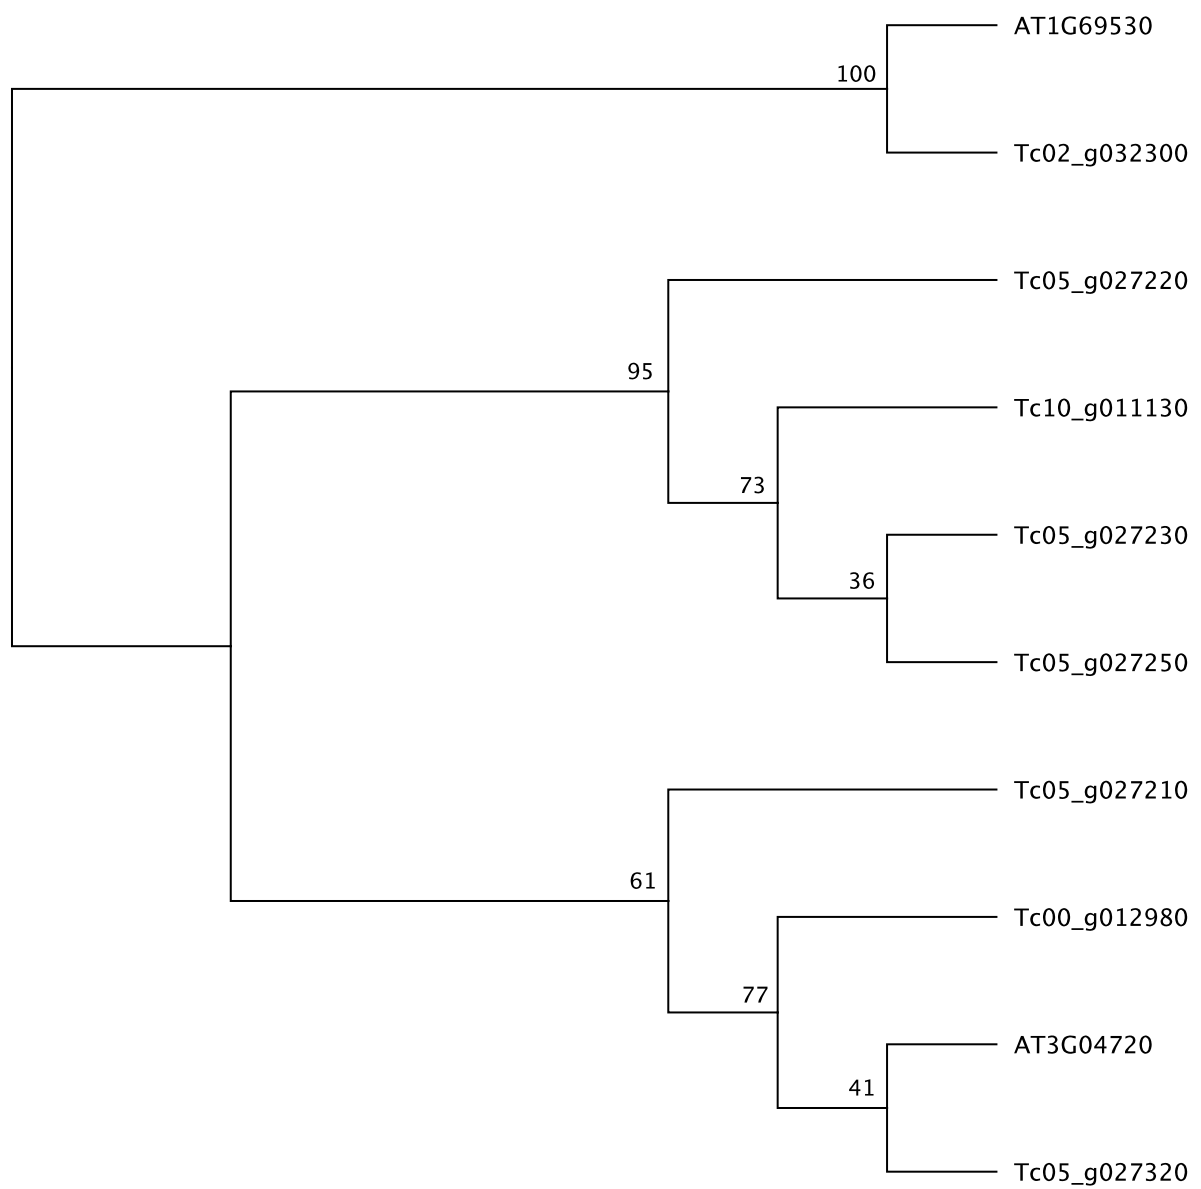

Figure S3. Maximum-likelihood phylogeny of Criollo and Arabidopsis PR-4 family members. Node labels represent bootstrap support from 100 replicates. Branch lengths represent genetic distance in substitutions per site. AT5G05460 and Tc02\_g032300, two  $\alpha$ -expansins that are part members of the PR-4 superfamily, were included as an outgroup.
