# Supplementary material for: Theobroma cacao L. pathogenesis-related gene tandem array members show diverse expression dynamics in response to pathogen colonization
Source: PubMed Central journal article supplement (PMC4869279; doi:10.1186/s12864-016-2693-3), 2016-05-17
Supplement: 12864_2016_2693_MOESM12_ESM.pdf [file 12864_2016_2693_MOESM12_ESM.pdf]

| Supplemental Table 10 - Percent identity of PR-1 family members. Highlighting in the same color indicates that the genes are grouped in a tandem array. |              |              |              |              |              |              |              |              |              |              |              |              |              |              |
|---------------------------------------------------------------------------------------------------------------------------------------------------------|--------------|--------------|--------------|--------------|--------------|--------------|--------------|--------------|--------------|--------------|--------------|--------------|--------------|--------------|
|                                                                                                                                                         | Tc02_g002380 | Tc02_g002410 | Tc02_g002400 | Tc02_g002420 | Tc02_g010380 | Tc02_g002390 | Tc01_g034430 | Tc02_g002430 | Tc05_g005530 | Tc09_g016590 | Tc09_g016580 | Tc09_g000720 | Tc01_g003940 | Tc10_g000980 |
| Tc02_g002380                                                                                                                                            |              | 70.625       | 69.167       | 60.208       | 58.958       | 63.502       | 52.795       | 57.764       | 51.235       | 55.144       | 48.283       | 45.342       | 46.138       | 43.558       |
| Tc02_g002410                                                                                                                                            | 70.625       |              | 88.889       | 62.526       | 63.395       | 71.097       | 51.016       | 60.772       | 51.919       | 50.101       | 44.643       | 47.967       | 44.711       | 48.394       |
| Tc02_g002400                                                                                                                                            | 69.167       | 88.889       |              | 63.561       | 61.728       | 67.089       | 51.329       | 59.714       | 51.423       | 50.407       | 45.509       | 48.671       | 46.185       | 47.475       |
| Tc02_g002420                                                                                                                                            | 60.208       | 62.526       | 63.561       |              | 55.28        | 62.42        | 47.737       | 67.695       | 48.262       | 51.329       | 45.582       | 46.296       | 40.404       | 44.919       |
| Tc02_g010380                                                                                                                                            | 58.958       | 63.395       | 61.728       | 55.28        |              | 60.549       | 41.24        | 52.929       | 43.882       | 47.904       | 43.367       | 44.982       | 43.82        | 64.815       |
| Tc02_g002390                                                                                                                                            | 63.502       | 71.097       | 67.089       | 62.42        | 60.549       |              | 48.428       | 59.119       | 48.958       | 51.667       | 45.808       | 49.057       | 42.593       | 46.377       |
| Tc01_g034430                                                                                                                                            | 52.795       | 51.016       | 51.329       | 47.737       | 41.24        | 48.428       |              | 51.205       | 50.08        | 50.1         | 43.027       | 48.566       | 42.697       | 38.856       |
| Tc02_g002430                                                                                                                                            | 57.764       | 60.772       | 59.714       | 67.695       | 52.929       | 59.119       | 51.205       |              | 49.301       | 48.104       | 45.098       | 45.783       | 41.815       | 44.98        |
| Tc05_g005530                                                                                                                                            | 51.235       | 51.919       | 51.423       | 48.262       | 43.882       | 48.958       | 50.08        | 49.301       |              | 49.701       | 46.024       | 44.92        | 41.341       | 37.733       |
| Tc09_g016590                                                                                                                                            | 55.144       | 50.101       | 50.407       | 51.329       | 47.904       | 51.667       | 50.1         | 48.104       | 49.701       |              | 52.242       | 49.701       | 42.353       | 36.727       |
| Tc09_g016580                                                                                                                                            | 48.283       | 44.643       | 45.509       | 45.582       | 43.367       | 45.808       | 43.027       | 45.098       | 46.024       | 52.242       |              | 44.561       | 46.369       | 34.893       |
| Tc09_g000720                                                                                                                                            | 45.342       | 47.967       | 48.671       | 46.296       | 44.982       | 49.057       | 48.566       | 45.783       | 44.92        | 49.701       | 44.561       |              | 44.007       | 34.531       |
| Tc01_g003940                                                                                                                                            | 46.138       | 44.711       | 46.185       | 40.404       | 43.82        | 42.593       | 42.697       | 41.815       | 41.341       | 42.353       | 46.369       | 44.007       |              | 33.725       |
| Tc10_g000980                                                                                                                                            | 43.558       | 48.394       | 47.475       | 44.919       | 64.815       | 46.377       | 38.856       | 44.98        | 37.733       | 36.727       | 34.893       | 34.531       | 33.725       |              |
