# Supplementary material for: Theobroma cacao L. pathogenesis-related gene tandem array members show diverse expression dynamics in response to pathogen colonization
Source: PubMed Central journal article supplement (PMC4869279; doi:10.1186/s12864-016-2693-3), 2016-05-17
Supplement: 12864_2016_2693_MOESM13_ESM.pdf [file 12864_2016_2693_MOESM13_ESM.pdf]

| Supplemental Table S11 - Percent identify of PR-3 family members. Highlighting in the same color indicates that the genes are grouped in a tandem array. |              |              |              |              |              |              |              |              |              |              |              |
|----------------------------------------------------------------------------------------------------------------------------------------------------------|--------------|--------------|--------------|--------------|--------------|--------------|--------------|--------------|--------------|--------------|--------------|
|                                                                                                                                                          | Tc01_g000770 | Tc02_g003890 | Tc01_g000800 | Tc01_g032950 | Tc01_g010350 | Tc04_g018160 | Tc06_g000490 | Tc04_g029180 | Tc04_g018100 | Tc04_g018090 | Tc04_g018110 |
| Tc01_g000770                                                                                                                                             |              | 63.291       | 65.657       | 52.415       | 60.792       | 42.749       | 44.374       | 42.316       | 40.684       | 43.388       | 39.266       |
| Tc02_g003890                                                                                                                                             | 63.291       |              | 64.015       | 53.623       | 53.061       | 44.408       | 42.029       | 43.565       | 41.635       | 43.169       | 42.345       |
| Tc01_g000800                                                                                                                                             | 65.657       | 64.015       |              | 57.987       | 54.966       | 42.765       | 46.424       | 46.303       | 42.342       | 43.372       | 43.629       |
| Tc01_g032950                                                                                                                                             | 52.415       | 53.623       | 57.987       |              | 49.933       | 40.247       | 43.31        | 44.014       | 44.613       | 43.951       | 41.605       |
| Tc01_g010350                                                                                                                                             | 60.792       | 53.061       | 54.966       | 49.933       |              | 35.139       | 43.307       | 41.47        | 36.929       | 39.142       | 36.653       |
| Tc04_g018160                                                                                                                                             | 42.749       | 44.408       | 42.765       | 40.247       | 35.139       |              | 34.093       | 35.216       | 58.918       | 61.728       | 59.03        |
| Tc06_g000490                                                                                                                                             | 44.374       | 42.029       | 46.424       | 43.31        | 43.307       | 34.093       |              | 71.097       | 38.235       | 36.156       | 33.876       |
| Tc04_g029180                                                                                                                                             | 42.316       | 43.565       | 46.303       | 44.014       | 41.47        | 35.216       | 71.097       |              | 36.52        | 36.323       | 34.773       |
| Tc04_g018100                                                                                                                                             | 40.684       | 41.635       | 42.342       | 44.613       | 36.929       | 58.918       | 38.235       | 36.52        |              | 77.047       | 67.544       |
| Tc04_g018090                                                                                                                                             | 43.388       | 43.169       | 43.372       | 43.951       | 39.142       | 61.728       | 36.156       | 36.323       | 77.047       |              | 68.272       |
| Tc04_g018110                                                                                                                                             | 39.266       | 42.345       | 43.629       | 41.605       | 36.653       | 59.03        | 33.876       | 34.773       | 67.544       | 68.272       |              |
