# Supplementary material for: Theobroma cacao L. pathogenesis-related gene tandem array members show diverse expression dynamics in response to pathogen colonization
Source: PubMed Central journal article supplement (PMC4869279; doi:10.1186/s12864-016-2693-3), 2016-05-17
Supplement: 12864_2016_2693_MOESM14_ESM.pdf [file 12864_2016_2693_MOESM14_ESM.pdf]

**Supplemental Table S14 - Percent identify of PR-4 family members. Highlighting in the same color indicates that the genes are grouped in a tandem array.**

|              | Tc05_g027210 | Tc00_g012980 | Tc05_g027320 | Tc05_g027220 | Tc05_g027230 | Tc10_g011130 | Tc05_g027250 |
|--------------|--------------|--------------|--------------|--------------|--------------|--------------|--------------|
| Tc05_g027210 |              | 68.065       | 62.005       | 69.213       | 66.204       | 67.361       | 67.593       |
| Tc00_g012980 | 68.065       |              | 66.323       | 55.787       | 49.432       | 55.324       | 55.556       |
| Tc05_g027320 | 62.005       | 66.323       |              | 50.105       | 45.724       | 49.686       | 49.895       |
| Tc05_g027220 | 69.213       | 55.787       | 50.105       |              | 90.754       | 91.727       | 88.129       |
| Tc05_g027230 | 66.204       | 49.432       | 45.724       | 90.754       |              | 96.215       | 91.607       |
| Tc10_g011130 | 67.361       | 55.324       | 49.686       | 91.727       | 96.215       |              | 92.686       |
| Tc05_g027250 | 67.593       | 55.556       | 49.895       | 88.129       | 91.607       | 92.686       |              |
