# Supplementary material for: Theobroma cacao L. pathogenesis-related gene tandem array members show diverse expression dynamics in response to pathogen colonization
Source: PubMed Central journal article supplement (PMC4869279; doi:10.1186/s12864-016-2693-3), 2016-05-17
Supplement: 12864_2016_2693_MOESM15_ESM.pdf [file 12864_2016_2693_MOESM15_ESM.pdf]

| Supplemental Table S13 - Normalized expression values of probes for PR genes, averaged across replicates |       |                                  |                                                                                    |                                                                                        |                                                                    |
|----------------------------------------------------------------------------------------------------------|-------|----------------------------------|------------------------------------------------------------------------------------|----------------------------------------------------------------------------------------|--------------------------------------------------------------------|
| TcID                                                                                                     | Class | Probe                            | <i>P. palmivora</i> -<br>treated mean<br>log <sub>2</sub> normalized<br>expression | <i>C. theobromicola</i> -<br>treated mean log <sub>2</sub><br>normalized<br>expression | Water-treated<br>mean log <sub>2</sub><br>normalized<br>expression |
| TC02G002380                                                                                              | PR-1  | TC02G002380<br>:1-480            | 5.53                                                                               | 6.13                                                                                   | 5.32                                                               |
| TC02G002400                                                                                              | PR-1  | TC02G002400<br>:1-486            | 6.24                                                                               | 6.08                                                                                   | 5.46                                                               |
| TC02G002410                                                                                              | PR-1  | TC02G002410<br>_3UTR0:1-186      | 14.35                                                                              | 13.12                                                                                  | 6.75                                                               |
| TC02G002410                                                                                              | PR-1  | TC02G002410<br>:1-489            | 14.86                                                                              | 13.75                                                                                  | 8.52                                                               |
| TC02G002420                                                                                              | PR-1  | TC02G002420<br>:1-480            | 5.75                                                                               | 5.54                                                                                   | 5.85                                                               |
| TC02G010380                                                                                              | PR-1  | TC02G010380<br>:1-1872           | 5.99                                                                               | 6.21                                                                                   | 6.03                                                               |
| TC02G002390                                                                                              | PR-1  | TC02G002390<br>:1-471            | 7.41                                                                               | 6.70                                                                                   | 6.10                                                               |
| TC01G034430                                                                                              | PR-1  | TC01G034430<br>_3UTR0:1-<br>1150 | 5.90                                                                               | 5.87                                                                                   | 5.75                                                               |
| TC01G034430                                                                                              | PR-1  | TC01G034430<br>:1-645            | 5.31                                                                               | 5.79                                                                                   | 5.20                                                               |
| TC02G002430                                                                                              | PR-1  | TC02G002430<br>_3UTR1:1-263      | 10.43                                                                              | 8.47                                                                                   | 8.29                                                               |
| TC02G002430                                                                                              | PR-1  | TC02G002430<br>:1-495            | 11.50                                                                              | 9.36                                                                                   | 9.22                                                               |
| TC05G005530                                                                                              | PR-1  | TC05G005530<br>:1-711            | 5.58                                                                               | 5.42                                                                                   | 5.56                                                               |
| TC09G016590                                                                                              | PR-1  | TC09G016590<br>_3UTR0:1-599      | 5.86                                                                               | 6.35                                                                                   | 6.24                                                               |
| TC09G016590                                                                                              | PR-1  | TC09G016590<br>:1-501            | 9.28                                                                               | 9.50                                                                                   | 9.59                                                               |
| TC09G016580                                                                                              | PR-1  | TC09G016580<br>_3UTR0:1-613      | 12.23                                                                              | 11.57                                                                                  | 12.05                                                              |
| TC09G016580                                                                                              | PR-1  | TC09G016580<br>:1-588            | 12.54                                                                              | 11.87                                                                                  | 12.39                                                              |
| TC09G000720                                                                                              | PR-1  | TC09G000720<br>:1-558            | 5.30                                                                               | 5.34                                                                                   | 5.36                                                               |
| TC01G003940                                                                                              | PR-1  | TC01G003940<br>_3UTR0:1-213      | 9.68                                                                               | 9.62                                                                                   | 10.27                                                              |
| TC01G003940                                                                                              | PR-1  | TC01G003940<br>:1-534            | 7.94                                                                               | 8.28                                                                                   | 8.76                                                               |

|             |      |                             |       |       |       |
|-------------|------|-----------------------------|-------|-------|-------|
| TC10G000980 | PR-1 | TC10G000980<br>:1-1716      | 6.97  | 7.30  | 6.40  |
| TC09G024130 | PR-2 | TC09G024130<br>_3UTR0:1-180 | 14.45 | 14.82 | 11.32 |
| TC09G024130 | PR-2 | TC09G024130<br>:1-1038      | 12.80 | 13.30 | 9.75  |
| TC04G029300 | PR-2 | TC04G029300<br>_3UTR0:1-151 | 13.11 | 11.14 | 6.31  |
| TC04G029300 | PR-2 | TC04G029300<br>:1-1113      | 14.09 | 12.23 | 6.82  |
| TC09G024150 | PR-2 | TC09G024150<br>:1-1044      | 5.79  | 5.56  | 5.61  |
| TC09G024140 | PR-2 | TC09G024140<br>:1-969       | 6.19  | 5.76  | 5.77  |
| TC09G023540 | PR-2 | TC09G023540<br>:1-1119      | 6.01  | 6.05  | 5.80  |
| TC00G083950 | PR-2 | TC00G083950<br>:1-1044      | 12.63 | 12.42 | 7.15  |
| TC05G016070 | PR-2 | TC05G016070<br>_3UTR0:1-231 | 9.58  | 9.93  | 5.83  |
| TC05G016070 | PR-2 | TC05G016070<br>:1-1035      | 9.45  | 9.85  | 6.26  |
| TC03G029620 | PR-2 | TC03G029620<br>:1-1026      | 5.47  | 5.70  | 5.28  |
| TC02G023780 | PR-2 | TC02G023780<br>:1-999       | 5.46  | 5.64  | 5.30  |
| TC09G008700 | PR-2 | TC09G008700<br>_3UTR0:1-469 | 11.31 | 11.11 | 11.52 |
| TC09G008700 | PR-2 | TC09G008700<br>_3UTR1:1-287 | 5.76  | 6.12  | 6.34  |
| TC09G008700 | PR-2 | TC09G008700<br>:1-1518      | 10.46 | 10.36 | 11.05 |
| TC09G011610 | PR-2 | TC09G011610<br>_3UTR0:1-203 | 12.03 | 12.21 | 11.71 |
| TC09G011610 | PR-2 | TC09G011610<br>:1-1173      | 11.52 | 11.58 | 11.35 |
| TC08G009900 | PR-2 | TC08G009900<br>:1-1014      | 5.07  | 5.51  | 5.40  |
| TC06G001730 | PR-2 | TC06G001730<br>:1-1251      | 6.44  | 6.72  | 6.64  |
| TC00G054290 | PR-2 | TC00G054290<br>_3UTR0:1-88  | 12.18 | 12.49 | 12.10 |
| TC00G054290 | PR-2 | TC00G054290<br>_3UTR1:1-328 | 12.32 | 12.56 | 11.97 |
| TC00G054290 | PR-2 | TC00G054290<br>:1-1104      | 11.85 | 12.10 | 11.79 |
| TC04G012520 | PR-2 | TC04G012520                 | 9.12  | 9.58  | 10.10 |

|             |      |                             |       |       |       |
|-------------|------|-----------------------------|-------|-------|-------|
|             |      | _3UTR0:1-283                |       |       |       |
| TC04G012520 | PR-2 | TC04G012520<br>:1-1497      | 8.73  | 9.23  | 9.74  |
| TC01G017650 | PR-2 | TC01G017650<br>_3UTR0:1-499 | 6.12  | 6.66  | 6.48  |
| TC01G017650 | PR-2 | TC01G017650<br>:1-1422      | 9.80  | 9.21  | 9.54  |
| TC02G007080 | PR-2 | TC02G007080<br>_3UTR0:1-336 | 13.34 | 13.46 | 12.92 |
| TC02G007080 | PR-2 | TC02G007080<br>:1-1380      | 14.34 | 14.38 | 13.98 |
| TC08G001980 | PR-2 | TC08G001980<br>_3UTR0:1-390 | 11.93 | 11.95 | 12.17 |
| TC08G001980 | PR-2 | TC08G001980<br>:1-1395      | 11.54 | 11.43 | 11.82 |
| TC03G022650 | PR-2 | TC03G022650<br>_3UTR0:1-174 | 7.65  | 7.73  | 8.49  |
| TC03G022650 | PR-2 | TC03G022650<br>:1-1227      | 13.43 | 13.55 | 13.78 |
| TC03G021200 | PR-2 | TC03G021200<br>_3UTR0:1-287 | 7.40  | 6.96  | 7.26  |
| TC03G021200 | PR-2 | TC03G021200<br>:1-1455      | 7.08  | 6.87  | 7.16  |
| TC09G031660 | PR-2 | TC09G031660<br>_3UTR0:1-338 | 9.55  | 9.32  | 8.54  |
| TC09G031660 | PR-2 | TC09G031660<br>:1-1494      | 11.11 | 10.90 | 10.18 |
| TC07G002650 | PR-2 | TC07G002650<br>_3UTR0:1-261 | 10.18 | 10.40 | 10.33 |
| TC07G002650 | PR-2 | TC07G002650<br>:1-1401      | 10.83 | 10.95 | 10.79 |
| TC06G012580 | PR-2 | TC06G012580<br>:1-1209      | 6.61  | 6.49  | 6.63  |
| TC02G028070 | PR-2 | TC02G028070<br>_3UTR0:1-359 | 7.37  | 7.57  | 8.38  |
| TC02G028070 | PR-2 | TC02G028070<br>:1-1566      | 7.76  | 7.36  | 8.22  |
| TC06G019320 | PR-2 | TC06G019320<br>_3UTR0:1-385 | 8.63  | 8.29  | 8.30  |
| TC06G019320 | PR-2 | TC06G019320<br>:1-1575      | 11.77 | 11.87 | 11.62 |
| TC01G021070 | PR-2 | TC01G021070<br>_3UTR0:1-418 | 13.56 | 13.29 | 13.08 |
| TC01G021070 | PR-2 | TC01G021070<br>:1-1386      | 12.95 | 12.64 | 12.51 |
| TC09G013490 | PR-2 | TC09G013490<br>_3UTR0:1-    | 12.40 | 12.47 | 12.44 |

|             |      |                             |       |       |       |
|-------------|------|-----------------------------|-------|-------|-------|
|             |      | 2851                        |       |       |       |
| TC09G013490 | PR-2 | TC09G013490<br>:1-1341      | 12.23 | 12.15 | 12.23 |
| TC10G003270 | PR-2 | TC10G003270<br>:1-1371      | 6.41  | 5.59  | 5.75  |
| TC08G005240 | PR-2 | TC08G005240<br>_3UTR0:1-498 | 6.04  | 5.54  | 6.24  |
| TC08G005240 | PR-2 | TC08G005240<br>:1-1386      | 7.15  | 6.56  | 7.40  |
| TC01G010310 | PR-2 | TC01G010310<br>:1-1425      | 5.75  | 6.04  | 5.53  |
| TC00G034720 | PR-2 | TC00G034720<br>_3UTR0:1-208 | 11.42 | 11.46 | 11.77 |
| TC00G034720 | PR-2 | TC00G034720<br>:1-1479      | 9.71  | 10.03 | 10.08 |
| TC04G020310 | PR-2 | TC04G020310<br>_3UTR0:1-220 | 6.17  | 6.29  | 6.16  |
| TC04G020310 | PR-2 | TC04G020310<br>:1-1473      | 6.70  | 6.48  | 6.64  |
| TC05G028370 | PR-2 | TC05G028370<br>:1-1440      | 11.83 | 11.94 | 11.77 |
| TC09G021600 | PR-2 | TC09G021600<br>_3UTR0:1-364 | 10.00 | 10.10 | 9.69  |
| TC09G021600 | PR-2 | TC09G021600<br>:1-1491      | 8.29  | 8.58  | 8.58  |
| TC09G010240 | PR-2 | TC09G010240<br>:1-1569      | 5.80  | 5.84  | 5.91  |
| TC04G023620 | PR-2 | TC04G023620<br>_3UTR0:1-131 | 5.54  | 6.00  | 5.65  |
| TC04G023620 | PR-2 | TC04G023620<br>:1-3063      | 8.03  | 7.62  | 8.11  |
| TC09G034460 | PR-2 | TC09G034460<br>:1-1545      | 6.59  | 6.64  | 6.98  |
| TC01G014030 | PR-2 | TC01G014030<br>_3UTR0:1-215 | 11.30 | 11.41 | 11.19 |
| TC01G014030 | PR-2 | TC01G014030<br>:1-1470      | 12.53 | 12.43 | 12.12 |
| TC01G010320 | PR-2 | TC01G010320<br>:1-1614      | 5.41  | 5.46  | 5.50  |
| TC09G000150 | PR-2 | TC09G000150<br>_3UTR0:1-94  | 10.37 | 10.52 | 11.00 |
| TC09G000150 | PR-2 | TC09G000150<br>:1-1461      | 11.50 | 11.63 | 11.82 |
| TC09G006080 | PR-2 | TC09G006080<br>_3UTR0:1-124 | 7.86  | 7.81  | 6.98  |
| TC09G006080 | PR-2 | TC09G006080<br>:1-1473      | 6.83  | 7.03  | 6.49  |

|             |      |                             |       |       |       |
|-------------|------|-----------------------------|-------|-------|-------|
| TC10G002190 | PR-2 | TC10G002190<br>:1-1254      | 5.61  | 5.47  | 5.29  |
| TC01G006420 | PR-2 | TC01G006420<br>_3UTR0:1-247 | 6.15  | 6.94  | 6.81  |
| TC01G006420 | PR-2 | TC01G006420<br>:1-1293      | 6.17  | 5.88  | 6.27  |
| TC01G000770 | PR-3 | TC01G000770<br>:1-936       | 13.08 | 12.25 | 8.02  |
| TC02G003890 | PR-3 | TC02G003890<br>_3UTR0:1-144 | 12.70 | 12.46 | 7.70  |
| TC02G003890 | PR-3 | TC02G003890<br>:1-957       | 12.80 | 12.66 | 8.28  |
| TC01G000800 | PR-3 | TC01G000800<br>_3UTR0:1-236 | 9.12  | 5.71  | 5.60  |
| TC01G000800 | PR-3 | TC01G000800<br>:1-792       | 10.39 | 7.33  | 5.49  |
| TC01G032950 | PR-3 | TC01G032950<br>_3UTR0:1-160 | 8.69  | 8.25  | 6.91  |
| TC01G032950 | PR-3 | TC01G032950<br>:1-825       | 8.12  | 7.46  | 6.57  |
| TC01G010350 | PR-3 | TC01G010350<br>:1-717       | 5.75  | 5.84  | 5.48  |
| TC04G018160 | PR-3 | TC04G018160<br>_3UTR0:1-251 | 13.81 | 14.02 | 7.88  |
| TC04G018160 | PR-3 | TC04G018160<br>:1-819       | 12.85 | 13.05 | 6.81  |
| TC06G000490 | PR-3 | TC06G000490<br>_3UTR0:1-341 | 15.28 | 15.35 | 15.14 |
| TC06G000490 | PR-3 | TC06G000490<br>:1-969       | 14.94 | 15.14 | 14.82 |
| TC04G029180 | PR-3 | TC04G029180<br>_3UTR0:1-286 | 14.36 | 14.19 | 13.26 |
| TC04G029180 | PR-3 | TC04G029180<br>:1-948       | 15.16 | 14.80 | 14.02 |
| TC04G018090 | PR-3 | TC04G018090<br>:1-807       | 10.73 | 10.24 | 8.48  |
| TC04G018100 | PR-3 | TC04G018100<br>_3UTR0:1-113 | 7.07  | 6.29  | 6.36  |
| TC04G018100 | PR-3 | TC04G018100<br>:1-675       | 11.13 | 9.70  | 6.64  |
| TC04G018110 | PR-3 | TC04G018110<br>:1-816       | 13.34 | 12.00 | 8.48  |
| TC05G027210 | PR-4 | TC05G027210<br>_3UTR0:1-254 | 9.95  | 8.16  | 6.15  |
| TC05G027210 | PR-4 | TC05G027210<br>:1-429       | 13.41 | 11.85 | 7.94  |
| TC00G012980 | PR-4 | TC00G012980                 | 5.41  | 5.64  | 5.21  |

|             |      |                              |       |       |       |
|-------------|------|------------------------------|-------|-------|-------|
|             |      | _3UTR0:1-2087                |       |       |       |
| TC00G012980 | PR-4 | TC00G012980<br>:1-582        | 9.11  | 8.42  | 6.89  |
| TC05G027320 | PR-4 | TC05G027320<br>_3UTR0:1-110  | 11.68 | 10.05 | 5.84  |
| TC05G027320 | PR-4 | TC05G027320<br>:1-624        | 11.51 | 9.96  | 5.87  |
| TC05G027220 | PR-4 | TC05G027220<br>_3UTR0:1-247  | 12.92 | 12.11 | 9.37  |
| TC05G027220 | PR-4 | TC05G027220<br>:1-816        | 15.23 | 14.41 | 11.84 |
| TC10G011130 | PR-4 | TC10G011130<br>_3UTR0:1-422  | 8.05  | 7.50  | 7.33  |
| TC10G011130 | PR-4 | TC10G011130<br>:1-819        | 12.94 | 12.09 | 10.92 |
| TC05G027230 | PR-4 | TC05G027230<br>:1-915        | 12.60 | 11.63 | 10.48 |
| TC05G027250 | PR-4 | TC05G027250<br>_3UTR0:1-1004 | 6.20  | 5.77  | 6.20  |
| TC05G027250 | PR-4 | TC05G027250<br>:1-834        | 15.55 | 15.03 | 13.60 |
| TC05G027340 | PR-4 | TC05G027340<br>:1-3459       | 5.84  | 5.61  | 5.85  |
| TC03G005540 | PR-5 | TC03G005540<br>_3UTR0:1-213  | 10.36 | 9.98  | 9.83  |
| TC03G005540 | PR-5 | TC03G005540<br>:1-750        | 10.03 | 9.49  | 9.58  |
| TC01G001580 | PR-5 | TC01G001580<br>:1-954        | 12.32 | 12.21 | 12.77 |
| TC08G003730 | PR-5 | TC08G003730<br>_3UTR0:1-1467 | 6.07  | 6.13  | 5.98  |
| TC08G003730 | PR-5 | TC08G003730<br>:1-963        | 14.12 | 14.12 | 13.90 |
| TC02G005190 | PR-5 | TC02G005190<br>_3UTR0:1-418  | 10.27 | 10.03 | 10.21 |
| TC02G005190 | PR-5 | TC02G005190<br>:1-1086       | 11.51 | 11.04 | 11.26 |
| TC08G001670 | PR-5 | TC08G001670<br>_3UTR0:1-185  | 9.30  | 9.06  | 8.46  |
| TC08G001670 | PR-5 | TC08G001670<br>:1-744        | 9.23  | 8.94  | 8.54  |
| TC01G001590 | PR-5 | TC01G001590<br>_3UTR0:1-596  | 9.29  | 8.79  | 8.92  |
| TC01G001590 | PR-5 | TC01G001590                  | 9.13  | 8.25  | 8.30  |

|             |      |                                  |       |       |       |
|-------------|------|----------------------------------|-------|-------|-------|
|             |      | :1-870                           |       |       |       |
| TC00G056050 | PR-5 | TC00G056050<br>_3UTR0:1-<br>2172 | 5.49  | 5.46  | 5.36  |
| TC00G056050 | PR-5 | TC00G056050<br>:1-726            | 6.04  | 6.73  | 6.26  |
| TC00G056070 | PR-5 | TC00G056070<br>_3UTR0:1-338      | 10.31 | 5.97  | 6.00  |
| TC00G056070 | PR-5 | TC00G056070<br>:1-732            | 13.10 | 9.21  | 8.51  |
| TC08G010190 | PR-5 | TC08G010190<br>:1-852            | 6.33  | 6.08  | 6.35  |
| TC00G056060 | PR-5 | TC00G056060<br>_3UTR0:1-605      | 5.68  | 5.37  | 5.67  |
| TC00G056060 | PR-5 | TC00G056060<br>:1-729            | 5.30  | 5.33  | 5.38  |
| TC04G020870 | PR-5 | TC04G020870<br>_3UTR0:1-317      | 5.78  | 6.25  | 6.33  |
| TC04G020870 | PR-5 | TC04G020870<br>:1-882            | 6.08  | 6.22  | 5.81  |
| TC02G005200 | PR-5 | TC02G005200<br>_3UTR0:1-689      | 6.74  | 6.17  | 6.50  |
| TC02G005200 | PR-5 | TC02G005200<br>:1-945            | 10.75 | 10.49 | 10.82 |
| TC05G004240 | PR-5 | TC05G004240<br>_3UTR0:1-292      | 7.88  | 7.42  | 7.60  |
| TC05G004240 | PR-5 | TC05G004240<br>:1-954            | 6.03  | 5.82  | 5.91  |
| TC08G003740 | PR-5 | TC08G003740<br>:1-942            | 10.20 | 9.48  | 9.00  |
| TC10G002890 | PR-5 | TC10G002890<br>_3UTR0:1-248      | 9.31  | 7.80  | 9.17  |
| TC10G002890 | PR-5 | TC10G002890<br>:1-747            | 8.05  | 7.69  | 8.23  |
| TC02G003020 | PR-5 | TC02G003020<br>:1-1017           | 7.83  | 7.72  | 7.90  |
| TC04G008530 | PR-5 | TC04G008530<br>_3UTR0:1-572      | 8.18  | 7.97  | 7.40  |
| TC04G008530 | PR-5 | TC04G008530<br>:1-765            | 10.33 | 10.12 | 9.25  |
| TC03G027030 | PR-5 | TC03G027030<br>_3UTR0:1-305      | 14.70 | 14.86 | 11.79 |
| TC03G027030 | PR-5 | TC03G027030<br>:1-723            | 13.86 | 13.85 | 10.67 |
| TC09G031980 | PR-5 | TC09G031980<br>_3UTR0:1-557      | 6.97  | 7.39  | 6.98  |
| TC09G031980 | PR-5 | TC09G031980                      | 11.51 | 11.15 | 10.72 |

|             |      |                             |       |       |       |
|-------------|------|-----------------------------|-------|-------|-------|
|             |      | :1-762                      |       |       |       |
| TC03G026960 | PR-5 | TC03G026960<br>_3UTR0:1-133 | 11.32 | 11.97 | 11.46 |
| TC03G026960 | PR-5 | TC03G026960<br>:1-678       | 10.65 | 11.19 | 10.81 |
| TC00G060970 | PR-5 | TC00G060970<br>:1-675       | 9.40  | 10.45 | 6.22  |
| TC03G027010 | PR-5 | TC03G027010<br>_3UTR0:1-241 | 11.21 | 9.58  | 5.47  |
| TC03G027010 | PR-5 | TC03G027010<br>:1-675       | 12.99 | 11.43 | 6.08  |
| TC03G026990 | PR-5 | TC03G026990<br>_3UTR0:1-173 | 8.55  | 7.61  | 5.37  |
| TC03G026990 | PR-5 | TC03G026990<br>:1-675       | 10.51 | 9.94  | 5.86  |
| TC00G056110 | PR-5 | TC00G056110<br>:1-756       | 5.98  | 6.28  | 5.66  |
| TC03G027000 | PR-5 | TC03G027000<br>_3UTR0:1-134 | 6.32  | 7.32  | 6.14  |
| TC03G027000 | PR-5 | TC03G027000<br>:1-585       | 8.04  | 8.40  | 5.85  |
| TC03G026980 | PR-5 | TC03G026980<br>:1-528       | 5.93  | 5.88  | 5.97  |
| TC09G016370 | PR-5 | TC09G016370<br>:1-456       | 5.67  | 5.66  | 5.81  |
| TC04G014480 | PR-5 | TC04G014480<br>:1-375       | 5.95  | 5.88  | 5.85  |
| TC03G027020 | PR-5 | TC03G027020<br>_3UTR0:1-291 | 5.53  | 5.50  | 5.49  |
| TC03G027020 | PR-5 | TC03G027020<br>:1-327       | 5.38  | 5.84  | 5.76  |
| TC10G005920 | PR-6 | TC10G005920<br>_3UTR0:1-182 | 12.31 | 10.29 | 6.33  |
| TC10G005920 | PR-6 | TC10G005920<br>:1-594       | 12.32 | 10.71 | 6.99  |
| TC10G005840 | PR-6 | TC10G005840<br>_3UTR0:1-975 | 7.99  | 6.05  | 5.27  |
| TC10G005840 | PR-6 | TC10G005840<br>:1-216       | 12.09 | 10.07 | 7.15  |
| TC10G005870 | PR-6 | TC10G005870<br>_3UTR0:1-179 | 9.00  | 7.14  | 5.42  |
| TC10G005870 | PR-6 | TC10G005870<br>:1-216       | 13.04 | 11.39 | 7.49  |
| TC10G005890 | PR-6 | TC10G005890<br>:1-216       | 9.70  | 7.81  | 6.02  |
| TC05G022770 | PR-6 | TC05G022770<br>_3UTR0:1-398 | 11.20 | 11.38 | 9.76  |



|             |      |                             |       |       |       |
|-------------|------|-----------------------------|-------|-------|-------|
| TC05G022770 | PR-6 | TC05G022770<br>:1-483       | 15.23 | 15.32 | 14.05 |
| TC05G022780 | PR-6 | TC05G022780<br>_3UTR0:1-641 | 15.07 | 15.19 | 14.56 |
| TC05G022780 | PR-6 | TC05G022780<br>:1-483       | 15.22 | 15.27 | 14.77 |
| TC03G026330 | PR-7 | TC03G026330<br>_3UTR0:1-609 | 5.77  | 5.81  | 5.97  |
| TC03G026330 | PR-7 | TC03G026330<br>:1-2232      | 5.40  | 5.40  | 5.37  |
| TC03G026340 | PR-7 | TC03G026340<br>:1-1887      | 5.48  | 5.53  | 5.77  |
| TC01G037030 | PR-7 | TC01G037030<br>:1-2307      | 12.64 | 12.29 | 10.31 |
| TC01G026170 | PR-7 | TC01G026170<br>_3UTR1:1-332 | 5.72  | 5.93  | 5.94  |
| TC01G026170 | PR-7 | TC01G026170<br>:1-2298      | 5.48  | 5.90  | 5.54  |
| TC01G037020 | PR-7 | TC01G037020<br>_3UTR0:1-134 | 11.10 | 11.17 | 9.07  |
| TC01G037020 | PR-7 | TC01G037020<br>:1-2418      | 8.83  | 9.13  | 7.27  |
| TC02G005130 | PR-7 | TC02G005130<br>_3UTR0:1-432 | 11.49 | 11.38 | 11.46 |
| TC02G005130 | PR-7 | TC02G005130<br>:1-2325      | 13.66 | 13.76 | 13.89 |
| TC01G006160 | PR-7 | TC01G006160<br>_3UTR0:1-274 | 13.25 | 13.33 | 13.13 |
| TC01G006160 | PR-7 | TC01G006160<br>:1-2283      | 13.31 | 13.24 | 13.24 |
| TC01G037010 | PR-7 | TC01G037010<br>:1-4701      | 11.55 | 11.89 | 11.28 |
| TC09G006830 | PR-7 | TC09G006830<br>_3UTR0:1-454 | 8.34  | 8.05  | 7.79  |
| TC09G006830 | PR-7 | TC09G006830<br>:1-2280      | 8.35  | 8.28  | 7.87  |
| TC00G013470 | PR-7 | TC00G013470<br>_3UTR0:1-282 | 11.96 | 11.92 | 11.84 |
| TC00G013470 | PR-7 | TC00G013470<br>:1-2304      | 10.67 | 10.75 | 10.70 |
| TC08G007740 | PR-7 | TC08G007740<br>_3UTR0:1-266 | 5.73  | 5.49  | 5.77  |
| TC08G007740 | PR-7 | TC08G007740<br>:1-2631      | 11.91 | 11.44 | 11.50 |
| TC03G018930 | PR-7 | TC03G018930<br>_3UTR0:1-238 | 12.91 | 13.16 | 13.05 |
| TC03G018930 | PR-7 | TC03G018930                 | 12.24 | 12.58 | 12.59 |

|             |      |                                  |       |       |       |
|-------------|------|----------------------------------|-------|-------|-------|
|             |      | :1-2337                          |       |       |       |
| TC06G010630 | PR-7 | TC06G010630<br>_3UTR0:1-351      | 12.17 | 12.04 | 12.10 |
| TC06G010630 | PR-7 | TC06G010630<br>:1-2319           | 11.19 | 11.04 | 11.22 |
| TC08G000270 | PR-7 | TC08G000270<br>_3UTR0:1-188      | 12.77 | 12.45 | 12.15 |
| TC08G000270 | PR-7 | TC08G000270<br>:1-2283           | 10.28 | 9.99  | 9.97  |
| TC07G000490 | PR-7 | TC07G000490<br>_3UTR0:1-134      | 6.54  | 6.27  | 7.49  |
| TC07G000490 | PR-7 | TC07G000490<br>:1-2313           | 6.79  | 6.50  | 7.30  |
| TC03G022570 | PR-7 | TC03G022570<br>_3UTR0:1-130      | 10.26 | 10.33 | 9.98  |
| TC03G022570 | PR-7 | TC03G022570<br>:1-2331           | 10.77 | 10.88 | 10.83 |
| TC06G013520 | PR-7 | TC06G013520<br>:1-2415           | 9.28  | 9.74  | 9.83  |
| TC00G032610 | PR-7 | TC00G032610<br>:1-2469           | 12.05 | 12.47 | 12.69 |
| TC10G002320 | PR-7 | TC10G002320<br>:1-6357           | 5.44  | 5.80  | 5.59  |
| TC08G000240 | PR-7 | TC08G000240<br>:1-2205           | 5.30  | 6.00  | 5.52  |
| TC08G000230 | PR-7 | TC08G000230<br>:1-2298           | 5.76  | 6.59  | 7.10  |
| TC01G000090 | PR-7 | TC01G000090<br>:1-2286           | 7.93  | 8.15  | 8.56  |
| TC10G002300 | PR-7 | TC10G002300<br>:1-2304           | 5.56  | 5.48  | 5.59  |
| TC05G013470 | PR-7 | TC05G013470<br>_3UTR0:1-<br>2305 | 5.27  | 5.35  | 5.25  |
| TC05G013470 | PR-7 | TC05G013470<br>:1-2301           | 5.48  | 5.21  | 5.42  |
| TC03G026560 | PR-7 | TC03G026560<br>:1-2325           | 5.59  | 5.60  | 5.47  |
| TC01G005210 | PR-7 | TC01G005210<br>_3UTR0:1-96       | 5.76  | 5.56  | 5.71  |
| TC01G005210 | PR-7 | TC01G005210<br>_3UTR1:1-173      | 7.42  | 6.42  | 6.62  |
| TC01G005210 | PR-7 | TC01G005210<br>:1-2400           | 5.56  | 5.53  | 5.31  |
| TC08G004000 | PR-7 | TC08G004000<br>:1-2343           | 7.16  | 7.52  | 7.13  |
| TC03G026570 | PR-7 | TC03G026570                      | 5.52  | 5.92  | 5.50  |

|             |      |                             |       |       |       |
|-------------|------|-----------------------------|-------|-------|-------|
|             |      | :1-2328                     |       |       |       |
| TC08G000260 | PR-7 | TC08G000260<br>:1-2382      | 11.09 | 10.85 | 11.09 |
| TC03G022590 | PR-7 | TC03G022590<br>:1-2358      | 7.25  | 7.74  | 6.15  |
| TC01G005220 | PR-7 | TC01G005220<br>_3UTR0:1-72  | 6.33  | 6.86  | 7.12  |
| TC01G005220 | PR-7 | TC01G005220<br>:1-2268      | 5.73  | 5.53  | 5.84  |
| TC10G002310 | PR-7 | TC10G002310<br>_3UTR0:1-80  | 5.96  | 6.13  | 5.97  |
| TC10G002310 | PR-7 | TC10G002310<br>:1-2136      | 5.81  | 6.24  | 5.72  |
| TC09G028480 | PR-7 | TC09G028480<br>:1-2679      | 5.35  | 5.11  | 5.41  |
| TC03G021760 | PR-7 | TC03G021760<br>:1-2358      | 5.87  | 5.67  | 5.80  |
| TC09G032690 | PR-7 | TC09G032690<br>:1-2178      | 5.66  | 5.65  | 5.64  |
| TC09G032720 | PR-7 | TC09G032720<br>:1-2139      | 5.40  | 5.46  | 5.57  |
| TC00G001690 | PR-7 | TC00G001690<br>:1-2262      | 8.39  | 8.38  | 8.52  |
| TC09G032710 | PR-7 | TC09G032710<br>:1-2235      | 5.25  | 5.54  | 5.64  |
| TC01G037040 | PR-7 | TC01G037040<br>_3UTR0:1-176 | 7.59  | 7.62  | 7.95  |
| TC01G037040 | PR-7 | TC01G037040<br>:1-2316      | 8.47  | 8.37  | 8.41  |
| TC05G010230 | PR-7 | TC05G010230<br>:1-2331      | 5.30  | 5.54  | 5.89  |
| TC00G007300 | PR-7 | TC00G007300<br>_3UTR0:1-340 | 6.48  | 6.54  | 6.01  |
| TC00G007300 | PR-7 | TC00G007300<br>:1-2352      | 6.88  | 6.56  | 6.51  |
| TC02G007300 | PR-7 | TC02G007300<br>_3UTR0:1-199 | 7.17  | 7.61  | 7.16  |
| TC02G007300 | PR-7 | TC02G007300<br>:1-2406      | 6.97  | 6.94  | 6.78  |
| TC03G022580 | PR-7 | TC03G022580<br>:1-2367      | 9.80  | 8.73  | 6.03  |
| TC10G002340 | PR-7 | TC10G002340<br>:1-2625      | 9.08  | 9.19  | 8.56  |
| TC08G000250 | PR-7 | TC08G000250<br>:1-2172      | 5.33  | 5.26  | 6.24  |
| TC00G038560 | PR-7 | TC00G038560<br>_3UTR0:1-285 | 9.85  | 9.39  | 9.58  |

|             |      |                             |       |       |       |
|-------------|------|-----------------------------|-------|-------|-------|
| TC00G038560 | PR-7 | TC00G038560<br>:1-2457      | 11.95 | 11.60 | 11.67 |
| TC06G000810 | PR-7 | TC06G000810<br>_3UTR0:1-213 | 10.13 | 10.20 | 10.78 |
| TC06G000810 | PR-7 | TC06G000810<br>:1-2568      | 10.92 | 11.07 | 11.61 |
| TC00G017310 | PR-7 | TC00G017310<br>:1-1416      | 5.39  | 5.50  | 5.33  |
| TC03G026320 | PR-7 | TC03G026320<br>:1-2226      | 6.09  | 5.99  | 6.27  |
| TC09G028050 | PR-7 | TC09G028050<br>:1-1155      | 5.69  | 5.48  | 5.49  |
| TC06G019800 | PR-7 | TC06G019800<br>:1-2439      | 5.39  | 5.74  | 5.30  |
| TC03G024170 | PR-7 | TC03G024170<br>:1-7845      | 5.26  | 5.70  | 5.60  |
| TC06G021130 | PR-7 | TC06G021130<br>:1-1620      | 5.43  | 5.72  | 5.53  |
| TC01G035050 | PR-8 | TC01G035050<br>_3UTR0:1-227 | 10.61 | 11.11 | 7.03  |
| TC01G035050 | PR-8 | TC01G035050<br>:1-891       | 10.65 | 10.93 | 7.29  |
| TC01G035150 | PR-8 | TC01G035150<br>:1-897       | 5.59  | 5.82  | 5.57  |
| TC00G024510 | PR-8 | TC00G024510<br>:1-897       | 5.41  | 5.46  | 5.61  |
| TC03G017760 | PR-8 | TC03G017760<br>:1-903       | 11.58 | 11.74 | 6.55  |
| TC01G035160 | PR-8 | TC01G035160<br>:1-903       | 5.31  | 5.11  | 5.61  |
| TC03G017780 | PR-8 | TC03G017780<br>_3UTR0:1-198 | 6.16  | 5.25  | 5.67  |
| TC03G017780 | PR-8 | TC03G017780<br>:1-897       | 6.01  | 5.56  | 5.75  |
| TC10G015260 | PR-8 | TC10G015260<br>:1-930       | 5.83  | 5.79  | 5.98  |
| TC10G015330 | PR-8 | TC10G015330<br>_3UTR0:1-307 | 6.78  | 6.85  | 6.18  |
| TC10G015330 | PR-8 | TC10G015330<br>:1-918       | 7.37  | 7.48  | 6.19  |
| TC01G032120 | PR-8 | TC01G032120<br>:1-918       | 8.73  | 8.19  | 7.95  |
| TC03G017790 | PR-8 | TC03G017790<br>:1-894       | 5.71  | 5.90  | 5.73  |
| TC01G035140 | PR-8 | TC01G035140<br>:1-846       | 8.10  | 9.18  | 8.73  |
| TC04G001620 | PR-8 | TC04G001620                 | 5.30  | 5.45  | 5.57  |

|             |      |                             |       |       |       |
|-------------|------|-----------------------------|-------|-------|-------|
|             |      | :1-828                      |       |       |       |
| TC01G035060 | PR-8 | TC01G035060<br>:1-918       | 5.63  | 5.38  | 6.17  |
| TC01G032260 | PR-8 | TC01G032260<br>_3UTR0:1-737 | 5.38  | 5.32  | 5.44  |
| TC01G032260 | PR-8 | TC01G032260<br>:1-324       | 5.52  | 5.64  | 5.65  |
| TC00G045940 | PR-9 | TC00G045940<br>_3UTR0:1-233 | 10.36 | 10.50 | 9.92  |
| TC00G045940 | PR-9 | TC00G045940<br>:1-996       | 10.62 | 10.39 | 10.17 |
| TC00G045400 | PR-9 | TC00G045400<br>_3UTR0:1-164 | 10.30 | 8.55  | 5.62  |
| TC00G045400 | PR-9 | TC00G045400<br>:1-960       | 12.43 | 10.86 | 6.15  |
| TC00G045440 | PR-9 | TC00G045440<br>:1-969       | 5.52  | 6.49  | 5.49  |
| TC00G014230 | PR-9 | TC00G014230<br>_3UTR0:1-464 | 15.63 | 15.32 | 14.69 |
| TC00G014230 | PR-9 | TC00G014230<br>:1-1041      | 14.86 | 14.28 | 13.49 |
| TC00G045610 | PR-9 | TC00G045610<br>_3UTR0:1-117 | 10.44 | 10.49 | 6.57  |
| TC00G045610 | PR-9 | TC00G045610<br>:1-969       | 12.35 | 12.26 | 8.54  |
| TC00G045360 | PR-9 | TC00G045360<br>:1-1077      | 5.02  | 5.63  | 5.10  |
| TC01G002490 | PR-9 | TC01G002490<br>_3UTR0:1-247 | 5.90  | 5.46  | 5.68  |
| TC01G002490 | PR-9 | TC01G002490<br>:1-1002      | 8.12  | 7.44  | 7.12  |
| TC02G008380 | PR-9 | TC02G008380<br>:1-1005      | 6.11  | 5.76  | 5.56  |
| TC10G016040 | PR-9 | TC10G016040<br>_3UTR0:1-276 | 11.43 | 9.87  | 10.70 |
| TC10G016040 | PR-9 | TC10G016040<br>:1-954       | 12.67 | 11.26 | 11.39 |
| TC00G040640 | PR-9 | TC00G040640<br>:1-963       | 7.27  | 7.38  | 5.60  |
| TC09G034910 | PR-9 | TC09G034910<br>:1-963       | 7.08  | 5.59  | 5.45  |
| TC01G004590 | PR-9 | TC01G004590<br>_3UTR0:1-109 | 11.58 | 11.74 | 9.72  |
| TC01G004590 | PR-9 | TC01G004590<br>:1-984       | 11.49 | 11.67 | 9.69  |
| TC10G016080 | PR-9 | TC10G016080<br>_3UTR0:1-179 | 13.61 | 13.58 | 12.22 |

|             |      |                                  |       |       |       |
|-------------|------|----------------------------------|-------|-------|-------|
| TC10G016080 | PR-9 | TC10G016080<br>:1-1002           | 14.85 | 14.67 | 13.50 |
| TC09G034930 | PR-9 | TC09G034930<br>_3UTR0:1-307      | 14.21 | 12.76 | 11.04 |
| TC09G034930 | PR-9 | TC09G034930<br>:1-981            | 13.97 | 12.73 | 10.97 |
| TC10G015970 | PR-9 | TC10G015970<br>_3UTR0:1-230      | 13.24 | 13.14 | 11.24 |
| TC10G015970 | PR-9 | TC10G015970<br>:1-966            | 12.49 | 12.41 | 10.72 |
| TC02G029020 | PR-9 | TC02G029020<br>:1-990            | 5.25  | 6.28  | 7.42  |
| TC08G002680 | PR-9 | TC08G002680<br>_3UTR0:1-133      | 5.29  | 5.74  | 5.45  |
| TC08G002680 | PR-9 | TC08G002680<br>:1-1047           | 6.00  | 5.99  | 5.72  |
| TC02G029090 | PR-9 | TC02G029090<br>:1-984            | 6.69  | 5.35  | 5.23  |
| TC04G029820 | PR-9 | TC04G029820<br>:1-999            | 6.10  | 6.02  | 6.28  |
| TC09G034950 | PR-9 | TC09G034950<br>_3UTR0:1-621      | 5.92  | 5.73  | 5.82  |
| TC09G034950 | PR-9 | TC09G034950<br>:1-978            | 6.60  | 6.08  | 6.53  |
| TC02G029120 | PR-9 | TC02G029120<br>:1-993            | 5.36  | 5.44  | 5.74  |
| TC02G029110 | PR-9 | TC02G029110<br>:1-993            | 5.18  | 5.04  | 5.23  |
| TC03G023600 | PR-9 | TC03G023600<br>_3UTR0:1-<br>1225 | 5.51  | 5.40  | 5.41  |
| TC03G023600 | PR-9 | TC03G023600<br>:1-996            | 5.73  | 5.59  | 5.76  |
| TC00G045630 | PR-9 | TC00G045630<br>:1-954            | 8.10  | 5.77  | 5.88  |
| TC04G016340 | PR-9 | TC04G016340<br>:1-951            | 7.64  | 6.00  | 6.19  |
| TC04G016740 | PR-9 | TC04G016740<br>:1-951            | 7.97  | 5.44  | 5.77  |
| TC04G027220 | PR-9 | TC04G027220<br>_3UTR0:1-159      | 6.73  | 6.58  | 6.06  |
| TC04G027220 | PR-9 | TC04G027220<br>:1-1005           | 5.31  | 5.40  | 5.51  |
| TC02G030420 | PR-9 | TC02G030420<br>_3UTR1:1-271      | 10.75 | 10.26 | 9.04  |
| TC02G030420 | PR-9 | TC02G030420<br>:1-981            | 9.76  | 9.48  | 8.32  |

|             |      |                              |       |       |       |
|-------------|------|------------------------------|-------|-------|-------|
| TC08G013300 | PR-9 | TC08G013300<br>_3UTR0:1-3841 | 5.54  | 5.52  | 5.68  |
| TC08G013300 | PR-9 | TC08G013300<br>_3UTR1:1-660  | 5.49  | 5.51  | 5.32  |
| TC08G013300 | PR-9 | TC08G013300<br>:1-1068       | 14.16 | 13.45 | 12.17 |
| TC04G027230 | PR-9 | TC04G027230<br>:1-984        | 5.48  | 5.34  | 5.37  |
| TC04G016760 | PR-9 | TC04G016760<br>:1-906        | 8.18  | 5.93  | 5.92  |
| TC01G008530 | PR-9 | TC01G008530<br>_3UTR0:1-219  | 7.78  | 7.42  | 7.82  |
| TC01G008530 | PR-9 | TC01G008530<br>:1-972        | 6.88  | 7.02  | 7.09  |
| TC03G019180 | PR-9 | TC03G019180<br>_3UTR0:1-85   | 6.41  | 6.05  | 5.94  |
| TC03G019180 | PR-9 | TC03G019180<br>:1-975        | 5.77  | 5.53  | 6.10  |
| TC02G012000 | PR-9 | TC02G012000<br>_3UTR0:1-380  | 11.60 | 10.89 | 9.11  |
| TC02G012000 | PR-9 | TC02G012000<br>:1-981        | 10.57 | 10.05 | 8.63  |
| TC02G012020 | PR-9 | TC02G012020<br>:1-978        | 6.96  | 7.60  | 5.69  |
| TC02G011960 | PR-9 | TC02G011960<br>_3UTR0:1-236  | 5.95  | 5.89  | 5.89  |
| TC02G011960 | PR-9 | TC02G011960<br>:1-981        | 6.35  | 6.28  | 6.40  |
| TC02G030430 | PR-9 | TC02G030430<br>_3UTR0:1-247  | 6.55  | 6.63  | 7.16  |
| TC02G030430 | PR-9 | TC02G030430<br>:1-987        | 6.99  | 7.06  | 7.95  |
| TC01G013330 | PR-9 | TC01G013330<br>_3UTR0:1-96   | 10.50 | 9.86  | 9.42  |
| TC01G013330 | PR-9 | TC01G013330<br>:1-951        | 8.30  | 7.66  | 7.38  |
| TC08G004060 | PR-9 | TC08G004060<br>_3UTR0:1-216  | 14.99 | 14.74 | 14.20 |
| TC08G004060 | PR-9 | TC08G004060<br>:1-951        | 14.94 | 14.49 | 13.71 |
| TC01G001190 | PR-9 | TC01G001190<br>_3UTR0:1-263  | 13.05 | 12.47 | 11.99 |
| TC01G001190 | PR-9 | TC01G001190<br>:1-951        | 12.46 | 11.76 | 11.47 |
| TC02G011940 | PR-9 | TC02G011940<br>:1-987        | 5.54  | 6.11  | 6.18  |

|             |      |                             |       |       |       |
|-------------|------|-----------------------------|-------|-------|-------|
| TC02G011950 | PR-9 | TC02G011950<br>_3UTR0:1-208 | 5.99  | 7.25  | 5.47  |
| TC02G011950 | PR-9 | TC02G011950<br>:1-975       | 6.65  | 7.70  | 6.32  |
| TC05G031640 | PR-9 | TC05G031640<br>_3UTR0:1-220 | 8.35  | 5.46  | 5.03  |
| TC05G031640 | PR-9 | TC05G031640<br>:1-990       | 9.40  | 6.26  | 5.51  |
| TC04G004360 | PR-9 | TC04G004360<br>_3UTR0:1-119 | 5.31  | 5.13  | 5.48  |
| TC04G004360 | PR-9 | TC04G004360<br>:1-972       | 5.54  | 5.14  | 5.47  |
| TC02G011920 | PR-9 | TC02G011920<br>_3UTR0:1-114 | 5.80  | 5.58  | 6.78  |
| TC02G011920 | PR-9 | TC02G011920<br>:1-987       | 6.11  | 5.52  | 6.67  |
| TC02G011930 | PR-9 | TC02G011930<br>_3UTR0:1-164 | 6.27  | 6.12  | 6.20  |
| TC02G011930 | PR-9 | TC02G011930<br>_3UTR1:1-525 | 5.71  | 5.96  | 5.67  |
| TC02G011930 | PR-9 | TC02G011930<br>:1-978       | 5.37  | 5.28  | 5.67  |
| TC04G004370 | PR-9 | TC04G004370<br>_3UTR0:1-200 | 7.58  | 8.43  | 6.80  |
| TC04G004370 | PR-9 | TC04G004370<br>:1-975       | 7.38  | 8.63  | 6.84  |
| TC04G004350 | PR-9 | TC04G004350<br>:1-972       | 5.38  | 5.49  | 5.64  |
| TC02G003150 | PR-9 | TC02G003150<br>_3UTR0:1-314 | 10.94 | 10.91 | 10.91 |
| TC02G003150 | PR-9 | TC02G003150<br>:1-957       | 12.46 | 12.67 | 12.54 |
| TC04G028060 | PR-9 | TC04G028060<br>:1-984       | 5.19  | 5.38  | 5.50  |
| TC04G019840 | PR-9 | TC04G019840<br>:1-1098      | 5.68  | 5.38  | 5.57  |
| TC00G045460 | PR-9 | TC00G045460<br>_3UTR0:1-280 | 14.93 | 14.50 | 13.63 |
| TC00G045460 | PR-9 | TC00G045460<br>:1-861       | 9.89  | 9.14  | 8.33  |
| TC00G054480 | PR-9 | TC00G054480<br>:1-1005      | 5.70  | 5.86  | 5.51  |
| TC09G000620 | PR-9 | TC09G000620<br>:1-975       | 6.42  | 6.30  | 6.45  |
| TC02G022830 | PR-9 | TC02G022830<br>:1-996       | 5.56  | 5.57  | 5.69  |
| TC00G020190 | PR-9 | TC00G020190                 | 8.54  | 9.44  | 9.00  |



|             |      |                                  |       |       |       |
|-------------|------|----------------------------------|-------|-------|-------|
|             |      | :1-978                           |       |       |       |
| TC03G021880 | PR-9 | TC03G021880<br>_3UTR0:1-116      | 13.33 | 13.45 | 13.29 |
| TC03G021880 | PR-9 | TC03G021880<br>:1-993            | 12.06 | 12.29 | 12.04 |
| TC09G001160 | PR-9 | TC09G001160<br>_3UTR0:1-228      | 5.44  | 5.62  | 6.15  |
| TC09G001160 | PR-9 | TC09G001160<br>:1-996            | 5.76  | 5.67  | 6.94  |
| TC08G012700 | PR-9 | TC08G012700<br>_3UTR0:1-<br>1188 | 5.53  | 5.45  | 5.59  |
| TC08G012700 | PR-9 | TC08G012700<br>:1-1008           | 11.16 | 10.06 | 10.74 |
| TC01G006280 | PR-9 | TC01G006280<br>_3UTR0:1-358      | 14.40 | 14.21 | 13.87 |
| TC01G006280 | PR-9 | TC01G006280<br>:1-993            | 14.54 | 14.43 | 13.89 |
| TC03G000530 | PR-9 | TC03G000530<br>_3UTR0:1-121      | 8.52  | 8.64  | 8.44  |
| TC03G000530 | PR-9 | TC03G000530<br>:1-993            | 5.88  | 6.40  | 6.89  |
| TC09G017500 | PR-9 | TC09G017500<br>:1-1446           | 5.47  | 5.26  | 5.35  |
| TC06G008540 | PR-9 | TC06G008540<br>:1-1335           | 6.16  | 6.11  | 6.79  |
| TC04G000340 | PR-9 | TC04G000340<br>:1-978            | 11.09 | 11.08 | 11.18 |
| TC06G019650 | PR-9 | TC06G019650<br>:1-993            | 5.73  | 5.87  | 5.76  |
| TC01G032570 | PR-9 | TC01G032570<br>:1-975            | 6.74  | 7.65  | 7.66  |
| TC05G006120 | PR-9 | TC05G006120<br>_3UTR0:1-145      | 8.86  | 6.90  | 6.01  |
| TC05G006120 | PR-9 | TC05G006120<br>:1-987            | 9.22  | 7.95  | 6.64  |
| TC02G013360 | PR-9 | TC02G013360<br>:1-930            | 5.43  | 5.58  | 5.84  |
| TC01G029350 | PR-9 | TC01G029350<br>:1-1158           | 5.29  | 5.45  | 5.33  |
| TC04G029620 | PR-9 | TC04G029620<br>:1-972            | 5.52  | 5.62  | 5.82  |
| TC09G011360 | PR-9 | TC09G011360<br>:1-885            | 6.34  | 5.78  | 6.91  |
| TC06G019150 | PR-9 | TC06G019150<br>_3UTR0:1-704      | 9.86  | 9.91  | 10.05 |
| TC06G019150 | PR-9 | TC06G019150                      | 14.86 | 14.59 | 14.95 |

|             |       |                             |       |       |      |
|-------------|-------|-----------------------------|-------|-------|------|
|             |       | :1-990                      |       |       |      |
| TC00G044710 | PR-9  | TC00G044710<br>:1-2598      | 6.16  | 6.28  | 6.08 |
| TC02G030980 | PR-9  | TC02G030980<br>:1-618       | 6.50  | 7.00  | 7.16 |
| TC06G014950 | PR-9  | TC06G014950<br>_3UTR0:1-294 | 6.06  | 6.62  | 7.54 |
| TC06G014950 | PR-9  | TC06G014950<br>:1-1323      | 5.62  | 5.99  | 6.35 |
| TC04G016710 | PR-9  | TC04G016710<br>:1-2412      | 8.93  | 9.16  | 8.86 |
| TC10G016070 | PR-9  | TC10G016070<br>:1-708       | 8.15  | 7.41  | 8.21 |
| TC02G030970 | PR-9  | TC02G030970<br>_3UTR0:1-208 | 8.07  | 8.11  | 8.20 |
| TC02G030970 | PR-9  | TC02G030970<br>:1-438       | 7.56  | 7.54  | 8.27 |
| TC02G011990 | PR-9  | TC02G011990<br>:1-657       | 5.52  | 5.63  | 5.55 |
| TC04G028780 | PR-10 | TC04G028780<br>_3UTR0:1-285 | 10.15 | 9.74  | 5.06 |
| TC04G028780 | PR-10 | TC04G028780<br>:1-477       | 10.01 | 9.49  | 5.75 |
| TC04G028860 | PR-10 | TC04G028860<br>_3UTR0:1-133 | 8.63  | 11.14 | 5.41 |
| TC04G028860 | PR-10 | TC04G028860<br>:1-477       | 7.63  | 9.67  | 5.68 |
| TC04G028790 | PR-10 | TC04G028790<br>:1-480       | 5.48  | 5.37  | 5.24 |
| TC04G028880 | PR-10 | TC04G028880<br>:1-483       | 8.23  | 8.19  | 6.63 |
| TC04G028900 | PR-10 | TC04G028900<br>_3UTR0:1-186 | 7.88  | 7.14  | 6.52 |
| TC04G028900 | PR-10 | TC04G028900<br>:1-483       | 7.49  | 7.40  | 6.64 |
| TC04G028760 | PR-10 | TC04G028760<br>:1-594       | 5.87  | 5.60  | 6.07 |
| TC01G031100 | PR-10 | TC01G031100<br>_3UTR0:1-305 | 14.89 | 15.34 | 9.77 |
| TC01G031100 | PR-10 | TC01G031100<br>:1-480       | 14.26 | 14.85 | 8.75 |
| TC05G000380 | PR-10 | TC05G000380<br>:1-843       | 5.17  | 5.52  | 5.44 |
| TC04G028740 | PR-10 | TC04G028740<br>_3UTR0:1-96  | 8.74  | 6.90  | 5.37 |
| TC04G028740 | PR-10 | TC04G028740<br>:1-483       | 9.10  | 7.19  | 5.85 |

|             |       |                                  |       |       |       |
|-------------|-------|----------------------------------|-------|-------|-------|
| TC04G028750 | PR-10 | TC04G028750<br>_3UTR0:1-188      | 7.33  | 7.22  | 7.14  |
| TC04G028750 | PR-10 | TC04G028750<br>:1-483            | 12.34 | 11.92 | 11.00 |
| TC00G031750 | PR-10 | TC00G031750<br>_3UTR0:1-<br>3533 | 5.09  | 5.15  | 5.23  |
| TC00G031750 | PR-10 | TC00G031750<br>:1-360            | 7.94  | 9.15  | 5.33  |
| TC10G014440 | PR-10 | TC10G014440<br>_3UTR1:1-96       | 9.91  | 10.54 | 6.88  |
| TC10G014440 | PR-10 | TC10G014440<br>:1-366            | 10.28 | 11.45 | 6.04  |
| TC04G028940 | PR-10 | TC04G028940<br>_3UTR0:1-71       | 6.57  | 6.95  | 5.66  |
| TC04G028940 | PR-10 | TC04G028940<br>:1-351            | 7.88  | 9.86  | 6.25  |
| TC09G003110 | PR-11 | TC09G003110<br>_3UTR0:1-158      | 9.48  | 8.51  | 6.35  |
| TC09G003110 | PR-11 | TC09G003110<br>:1-1107           | 8.21  | 7.46  | 6.14  |
| TC09G003140 | PR-11 | TC09G003140<br>:1-2145           | 9.28  | 9.18  | 7.67  |
| TC09G003120 | PR-11 | TC09G003120<br>:1-2400           | 6.00  | 5.54  | 5.78  |
| TC09G003150 | PR-11 | TC09G003150<br>:1-2313           | 8.57  | 8.46  | 8.40  |
| TC09G003130 | PR-11 | TC09G003130<br>:1-1281           | 6.55  | 6.41  | 6.01  |
| TC09G003180 | PR-11 | TC09G003180<br>:1-2250           | 5.45  | 5.88  | 5.79  |
| TC09G003190 | PR-11 | TC09G003190<br>_3UTR0:1-122      | 9.87  | 9.22  | 9.64  |
| TC09G003190 | PR-11 | TC09G003190<br>:1-1140           | 10.87 | 10.21 | 10.51 |
| TC09G001640 | PR-11 | TC09G001640<br>:1-1389           | 9.06  | 8.37  | 6.57  |
| TC09G003200 | PR-11 | TC09G003200<br>:1-1266           | 5.45  | 5.42  | 5.38  |
| TC09G003160 | PR-11 | TC09G003160<br>:1-978            | 5.70  | 5.44  | 5.65  |
| TC00G043900 | PR-11 | TC00G043900<br>_3UTR0:1-965      | 5.63  | 5.55  | 5.61  |
| TC00G043900 | PR-11 | TC00G043900<br>:1-351            | 5.68  | 5.65  | 5.97  |
| TC02G006630 | PR-12 | TC02G006630<br>:1-285            | 5.11  | 5.43  | 5.05  |

|             |       |                                  |       |       |       |
|-------------|-------|----------------------------------|-------|-------|-------|
| TC02G006660 | PR-12 | TC02G006660<br>:1-171            | 5.48  | 5.26  | 5.61  |
| TC08G002440 | PR-12 | TC08G002440<br>:1-249            | 5.60  | 5.45  | 5.39  |
| TC04G016400 | PR-14 | TC04G016400<br>_3UTR0:1-139      | 15.31 | 15.22 | 15.42 |
| TC04G016400 | PR-14 | TC04G016400<br>_3UTR1:1-141      | 10.93 | 10.64 | 10.72 |
| TC04G016400 | PR-14 | TC04G016400<br>:1-420            | 15.05 | 14.95 | 14.96 |
| TC04G016380 | PR-14 | TC04G016380<br>_3UTR0:1-326      | 5.39  | 5.74  | 5.66  |
| TC04G016380 | PR-14 | TC04G016380<br>:1-390            | 6.61  | 6.62  | 7.34  |
| TC04G016440 | PR-14 | TC04G016440<br>_3UTR1:1-<br>1271 | 5.65  | 5.68  | 5.92  |
| TC04G016440 | PR-14 | TC04G016440<br>:1-369            | 6.21  | 6.27  | 6.30  |
| TC09G035160 | PR-14 | TC09G035160<br>_3UTR0:1-269      | 13.67 | 11.45 | 6.80  |
| TC09G035160 | PR-14 | TC09G035160<br>:1-360            | 13.83 | 11.64 | 7.76  |
| TC04G016450 | PR-14 | TC04G016450<br>_3UTR0:1-<br>4065 | 5.74  | 5.65  | 5.68  |
| TC04G016450 | PR-14 | TC04G016450<br>:1-459            | 10.85 | 11.20 | 10.95 |
| TC09G035150 | PR-14 | TC09G035150<br>_3UTR0:1-165      | 10.28 | 8.81  | 5.46  |
| TC09G035150 | PR-14 | TC09G035150<br>:1-351            | 11.39 | 9.51  | 6.35  |
| TC06G001000 | PR-14 | TC06G001000<br>_3UTR0:1-222      | 7.17  | 6.92  | 6.65  |
| TC06G001000 | PR-14 | TC06G001000<br>:1-348            | 5.67  | 5.14  | 5.21  |
| TC01G034520 | PR-14 | TC01G034520<br>_3UTR0:1-152      | 5.87  | 5.55  | 5.59  |
| TC01G034520 | PR-14 | TC01G034520<br>:1-393            | 5.46  | 5.33  | 5.50  |
| TC01G039190 | PR-14 | TC01G039190<br>:1-324            | 6.37  | 6.17  | 6.47  |
| TC03G023690 | PR-14 | TC03G023690<br>:1-360            | 12.05 | 12.33 | 12.31 |
| TC04G013310 | PR-14 | TC04G013310<br>_3UTR0:1-167      | 6.12  | 6.72  | 6.18  |
| TC04G013310 | PR-14 | TC04G013310                      | 5.30  | 5.20  | 5.38  |

|             |       |                                  |       |       |       |
|-------------|-------|----------------------------------|-------|-------|-------|
|             |       | :1-369                           |       |       |       |
| TC10G016320 | PR-14 | TC10G016320<br>_3UTR0:1-314      | 5.43  | 5.61  | 6.24  |
| TC10G016320 | PR-14 | TC10G016320<br>:1-375            | 6.99  | 7.28  | 8.29  |
| TC02G016580 | PR-14 | TC02G016580<br>:1-348            | 5.70  | 5.53  | 5.30  |
| TC06G020010 | PR-14 | TC06G020010<br>_3UTR0:1-770      | 5.57  | 5.42  | 5.85  |
| TC06G020010 | PR-14 | TC06G020010<br>:1-348            | 7.24  | 6.94  | 7.28  |
| TC06G020030 | PR-14 | TC06G020030<br>:1-492            | 5.56  | 5.52  | 5.80  |
| TC06G000990 | PR-14 | TC06G000990<br>_3UTR1:1-229      | 6.55  | 5.83  | 5.96  |
| TC06G000990 | PR-14 | TC06G000990<br>:1-288            | 5.48  | 5.35  | 5.45  |
| TC03G009350 | PR-16 | TC03G009350<br>_3UTR0:1-197      | 12.98 | 12.99 | 11.60 |
| TC03G009350 | PR-16 | TC03G009350<br>:1-666            | 12.87 | 12.93 | 11.70 |
| TC05G025530 | PR-16 | TC05G025530<br>:1-867            | 6.78  | 5.79  | 5.72  |
| TC05G025440 | PR-16 | TC05G025440<br>_3UTR0:1-311      | 7.40  | 6.89  | 6.28  |
| TC05G025440 | PR-16 | TC05G025440<br>:1-672            | 13.42 | 12.18 | 11.00 |
| TC05G025420 | PR-16 | TC05G025420<br>_3UTR0:1-328      | 9.47  | 8.34  | 7.54  |
| TC05G025420 | PR-16 | TC05G025420<br>:1-675            | 13.91 | 12.57 | 11.06 |
| TC05G025400 | PR-16 | TC05G025400<br>_3UTR0:1-125      | 6.34  | 5.55  | 5.29  |
| TC05G025400 | PR-16 | TC05G025400<br>:1-678            | 5.81  | 5.74  | 5.53  |
| TC05G025410 | PR-16 | TC05G025410<br>_3UTR0:1-<br>1027 | 5.63  | 5.94  | 5.49  |
| TC05G025410 | PR-16 | TC05G025410<br>_3UTR1:1-537      | 5.12  | 5.81  | 6.36  |
| TC05G025410 | PR-16 | TC05G025410<br>:1-678            | 9.06  | 7.95  | 7.38  |
| TC05G025330 | PR-16 | TC05G025330<br>_3UTR0:1-127      | 5.23  | 5.31  | 5.29  |
| TC05G025330 | PR-16 | TC05G025330<br>:1-666            | 4.97  | 5.31  | 5.35  |
| TC05G031880 | PR-16 | TC05G031880                      | 12.04 | 12.05 | 11.70 |

|             |       |                                  |       |       |       |
|-------------|-------|----------------------------------|-------|-------|-------|
|             |       | _3UTR0:1-275                     |       |       |       |
| TC05G031880 | PR-16 | TC05G031880<br>:1-654            | 12.91 | 12.87 | 12.49 |
| TC05G024700 | PR-16 | TC05G024700<br>_3UTR1:1-131      | 5.35  | 5.41  | 5.21  |
| TC05G024700 | PR-16 | TC05G024700<br>:1-663            | 6.01  | 6.02  | 5.92  |
| TC05G025450 | PR-16 | TC05G025450<br>_3UTR0:1-167      | 7.43  | 6.91  | 6.35  |
| TC05G025450 | PR-16 | TC05G025450<br>:1-681            | 9.50  | 8.08  | 6.88  |
| TC05G025350 | PR-16 | TC05G025350<br>:1-681            | 5.75  | 6.27  | 5.92  |
| TC05G025310 | PR-16 | TC05G025310<br>_3UTR0:1-175      | 7.53  | 7.72  | 7.37  |
| TC05G025310 | PR-16 | TC05G025310<br>:1-678            | 7.39  | 7.76  | 7.40  |
| TC05G025520 | PR-16 | TC05G025520<br>_3UTR0:1-<br>2210 | 5.28  | 5.46  | 5.36  |
| TC05G025520 | PR-16 | TC05G025520<br>:1-786            | 12.63 | 11.61 | 10.34 |
| TC06G000370 | PR-16 | TC06G000370<br>:1-657            | 6.37  | 6.38  | 6.32  |
| TC01G033170 | PR-16 | TC01G033170<br>:1-660            | 15.16 | 15.13 | 14.17 |
| TC00G037180 | PR-16 | TC00G037180<br>:1-657            | 10.71 | 10.56 | 9.96  |
| TC05G008860 | PR-16 | TC05G008860<br>:1-795            | 7.54  | 7.20  | 7.00  |
| TC10G009710 | PR-16 | TC10G009710<br>_3UTR0:1-282      | 11.52 | 10.68 | 9.59  |
| TC10G009710 | PR-16 | TC10G009710<br>:1-642            | 10.66 | 9.75  | 8.72  |
| TC09G007080 | PR-16 | TC09G007080<br>_3UTR1:1-235      | 14.81 | 14.41 | 13.93 |
| TC09G007080 | PR-16 | TC09G007080<br>:1-624            | 14.42 | 13.72 | 13.10 |
| TC05G025480 | PR-16 | TC05G025480<br>:1-534            | 9.86  | 8.58  | 7.38  |
| TC00G013300 | PR-16 | TC00G013300<br>:1-612            | 13.35 | 13.06 | 12.59 |
| TC05G025360 | PR-16 | TC05G025360<br>:1-615            | 5.40  | 5.40  | 5.44  |
| TC03G016120 | PR-16 | TC03G016120<br>_3UTR0:1-262      | 5.75  | 5.59  | 5.50  |
| TC03G016120 | PR-16 | TC03G016120                      | 5.72  | 6.09  | 6.09  |

|             |       |                             |       |       |      |
|-------------|-------|-----------------------------|-------|-------|------|
|             |       | :1-2724                     |       |       |      |
| TC05G025470 | PR-16 | TC05G025470<br>:1-480       | 6.22  | 6.07  | 5.87 |
| TC06G009700 | PR-16 | TC06G009700<br>:1-879       | 5.38  | 5.67  | 5.70 |
| TC05G025430 | PR-16 | TC05G025430<br>:1-573       | 5.69  | 6.38  | 6.28 |
| TC00G054490 | PR-16 | TC00G054490<br>:1-2223      | 5.18  | 5.13  | 5.20 |
| TC09G019920 | PR-16 | TC09G019920<br>:1-633       | 5.73  | 5.91  | 5.99 |
| TC05G024940 | PR-16 | TC05G024940<br>:1-624       | 7.14  | 7.23  | 7.15 |
| TC07G004510 | PR-16 | TC07G004510<br>:1-708       | 5.38  | 5.43  | 5.47 |
| TC05G009390 | PR-16 | TC05G009390<br>_3UTR0:1-86  | 7.43  | 8.07  | 8.60 |
| TC05G009390 | PR-16 | TC05G009390<br>:1-2814      | 6.07  | 6.31  | 6.71 |
| TC09G019910 | PR-16 | TC09G019910<br>:1-618       | 5.93  | 5.58  | 5.73 |
| TC00G076490 | PR-16 | TC00G076490<br>:1-516       | 5.57  | 5.84  | 5.67 |
| TC06G000400 | PR-16 | TC06G000400<br>:1-342       | 5.56  | 5.37  | 5.37 |
| TC00G054500 | PR-16 | TC00G054500<br>:1-450       | 5.22  | 5.22  | 5.26 |
| TC07G004580 | PR-16 | TC07G004580<br>:1-411       | 5.32  | 5.29  | 5.34 |
| TC07G004710 | PR-16 | TC07G004710<br>:1-468       | 5.25  | 5.20  | 5.22 |
| TC02G009630 | PR-17 | TC02G009630<br>_3UTR0:1-153 | 6.02  | 5.57  | 5.62 |
| TC02G009630 | PR-17 | TC02G009630<br>:1-681       | 6.57  | 6.09  | 5.53 |
| TC02G009600 | PR-17 | TC02G009600<br>:1-765       | 12.08 | 11.81 | 5.91 |
| TC02G009590 | PR-17 | TC02G009590<br>:1-678       | 7.94  | 9.06  | 5.82 |
| TC02G009610 | PR-17 | TC02G009610<br>_3UTR0:1-440 | 9.80  | 9.19  | 5.46 |
| TC02G009610 | PR-17 | TC02G009610<br>:1-705       | 10.26 | 9.62  | 5.58 |
| TC02G009650 | PR-17 | TC02G009650<br>:1-624       | 6.61  | 5.70  | 5.47 |
