# Supplementary material for: Theobroma cacao L. pathogenesis-related gene tandem array members show diverse expression dynamics in response to pathogen colonization
Source: PubMed Central journal article supplement (PMC4869279; doi:10.1186/s12864-016-2693-3), 2016-05-17
Supplement: 12864_2016_2693_MOESM16_ESM.pdf [file 12864_2016_2693_MOESM16_ESM.pdf]

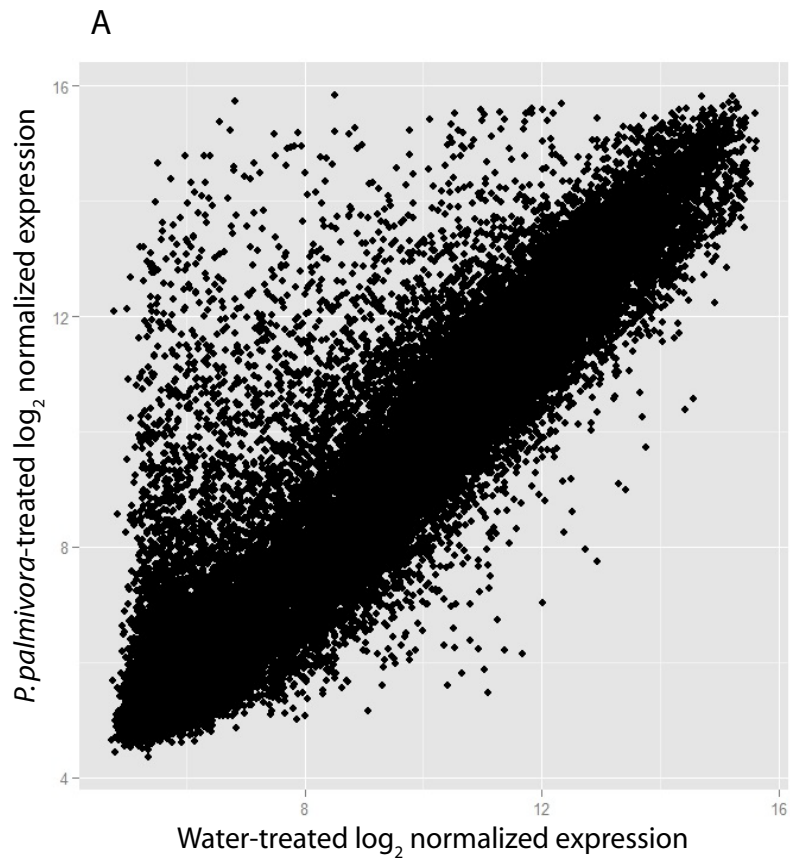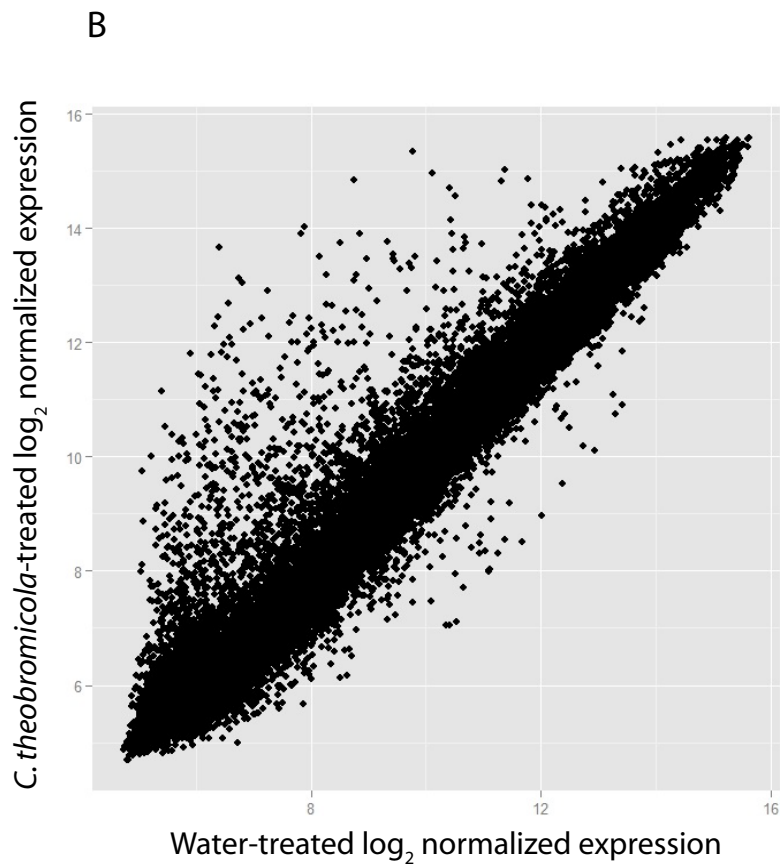

Figure S2. Whole genome expression profiles in pathogen infected leaves. Scatterplots of  $\log_2$  normalized expression values for all probes on the microarray, comparing A) *Phytophthora palmivora* and water treatment and B) *Colletotrichum theobromicola* and water treatment.
