# Supplementary material for: Theobroma cacao L. pathogenesis-related gene tandem array members show diverse expression dynamics in response to pathogen colonization
Source: PubMed Central journal article supplement (PMC4869279; doi:10.1186/s12864-016-2693-3), 2016-05-17
Supplement: 12864_2016_2693_MOESM17_ESM.pdf [file 12864_2016_2693_MOESM17_ESM.pdf]

| <b>Supplemental Table S14 - Log<sub>2</sub> fold induction for all significantly regulated (Benjamini-Hochberg <math>p &lt; 0.05</math>) PR genes on microarray.</b> |              |                                                              |                                                                  |
|----------------------------------------------------------------------------------------------------------------------------------------------------------------------|--------------|--------------------------------------------------------------|------------------------------------------------------------------|
| <b>TcID</b>                                                                                                                                                          | <b>Class</b> | <b>Log<sub>2</sub> Fold Induction by <i>P. palmivora</i></b> | <b>Log<sub>2</sub> Fold Induction by <i>C. theobromicola</i></b> |
| TC02G002410                                                                                                                                                          | PR-1         | 6.969214921                                                  | 5.803005844                                                      |
| TC00G083950                                                                                                                                                          | PR-2         | 5.481485868                                                  | 5.274902853                                                      |
| TC02G028070                                                                                                                                                          | PR-2         | -1.007284112                                                 | 0                                                                |
| TC04G012520                                                                                                                                                          | PR-2         | -1.004855831                                                 | 0                                                                |
| TC04G029300                                                                                                                                                          | PR-2         | 7.038733873                                                  | 5.124632397                                                      |
| TC05G016070                                                                                                                                                          | PR-2         | 3.471711585                                                  | 3.852450373                                                      |
| TC09G024130                                                                                                                                                          | PR-2         | 3.091005297                                                  | 3.525725486                                                      |
| TC09G031660                                                                                                                                                          | PR-2         | 0.931173332                                                  | 0                                                                |
| TC01G000770                                                                                                                                                          | PR-3         | 5.062394087                                                  | 4.232396812                                                      |
| TC01G000800                                                                                                                                                          | PR-3         | 4.204702138                                                  | 0                                                                |
| TC01G032950                                                                                                                                                          | PR-3         | 1.664342235                                                  | 0                                                                |
| TC02G003890                                                                                                                                                          | PR-3         | 4.762007095                                                  | 4.575789895                                                      |
| TC04G018090                                                                                                                                                          | PR-3         | 2.245266721                                                  | 0                                                                |
| TC04G018100                                                                                                                                                          | PR-3         | 4.486635225                                                  | 3.058348476                                                      |
| TC04G018110                                                                                                                                                          | PR-3         | 4.868411348                                                  | 3.524123658                                                      |
| TC04G018160                                                                                                                                                          | PR-3         | 5.987219197                                                  | 6.191667463                                                      |
| TC05G027210                                                                                                                                                          | PR-4         | 4.635764914                                                  | 3.904701358                                                      |
| TC05G027220                                                                                                                                                          | PR-4         | 3.465605498                                                  | 2.74290496                                                       |
| TC05G027320                                                                                                                                                          | PR-4         | 5.73783208                                                   | 4.153153375                                                      |
| TC00G056070                                                                                                                                                          | PR-5         | 4.451767113                                                  | 0                                                                |
| TC00G060970                                                                                                                                                          | PR-5         | 3.180438493                                                  | 4.230680177                                                      |
| TC03G026990                                                                                                                                                          | PR-5         | 3.914339712                                                  | 4.075639354                                                      |
| TC03G027000                                                                                                                                                          | PR-5         | 2.187517329                                                  | 2.553509804                                                      |
| TC03G027010                                                                                                                                                          | PR-5         | 6.323194993                                                  | 4.724213803                                                      |
| TC03G027030                                                                                                                                                          | PR-5         | 3.052693754                                                  | 3.127005464                                                      |
| TC05G022770                                                                                                                                                          | PR-6         | 1.183812493                                                  | 0                                                                |
| TC10G005840                                                                                                                                                          | PR-6         | 3.835164484                                                  | 0                                                                |
| TC10G005870                                                                                                                                                          | PR-6         | 4.563892059                                                  | 3.899141195                                                      |
| TC10G005890                                                                                                                                                          | PR-6         | 3.680034051                                                  | 0                                                                |
| TC10G005920                                                                                                                                                          | PR-6         | 5.657179105                                                  | 3.836989675                                                      |
| TC00G032610                                                                                                                                                          | PR-7         | -0.648659534                                                 | 0                                                                |
| TC01G037020                                                                                                                                                          | PR-7         | 2.035243353                                                  | 0                                                                |
| TC03G022580                                                                                                                                                          | PR-7         | 3.765800623                                                  | 2.700390846                                                      |

|             |       |              |             |
|-------------|-------|--------------|-------------|
| TC06G000810 | PR-7  | -0.690191189 | 0           |
| TC08G000230 | PR-7  | -1.338701774 | 0           |
| TC01G035050 | PR-8  | 3.469055016  | 3.86143576  |
| TC03G017760 | PR-8  | 5.029322581  | 5.186825269 |
| TC00G014230 | PR-9  | 1.368199733  | 0           |
| TC00G045400 | PR-9  | 5.477616751  | 3.822067416 |
| TC00G045460 | PR-9  | 1.427169267  | 0           |
| TC00G045610 | PR-9  | 3.837201882  | 3.813211387 |
| TC00G045630 | PR-9  | 2.217918663  | 0           |
| TC01G004590 | PR-9  | 1.830104938  | 2.002740813 |
| TC02G011950 | PR-9  | 0            | 1.782274543 |
| TC02G012020 | PR-9  | 1.266651919  | 1.90791588  |
| TC04G004370 | PR-9  | 0            | 1.795617951 |
| TC05G006120 | PR-9  | 2.715351743  | 0           |
| TC05G031640 | PR-9  | 3.883928429  | 0           |
| TC06G014950 | PR-9  | -1.484519935 | 0           |
| TC08G013300 | PR-9  | 1.988816031  | 0           |
| TC09G034930 | PR-9  | 3.087674485  | 0           |
| TC10G015970 | PR-9  | 1.88389408   | 1.792325945 |
| TC00G031750 | PR-10 | 2.611666618  | 3.82153607  |
| TC01G031100 | PR-10 | 5.316404504  | 5.84017564  |
| TC04G028740 | PR-10 | 3.307337415  | 0           |
| TC04G028750 | PR-10 | 1.342116344  | 0           |
| TC04G028780 | PR-10 | 4.673157106  | 4.677570649 |
| TC04G028860 | PR-10 | 2.588858057  | 5.7382445   |
| TC04G028900 | PR-10 | 1.354054231  | 0           |
| TC04G028940 | PR-10 | 0            | 3.610891829 |
| TC10G014440 | PR-10 | 3.63370518   | 4.528033057 |
| TC09G001640 | PR-11 | 2.498752807  | 1.799829394 |
| TC09G003110 | PR-11 | 2.604179538  | 2.161760349 |
| TC09G003140 | PR-11 | 1.611253048  | 1.512622369 |
| TC09G035150 | PR-14 | 4.925714025  | 3.253387745 |
| TC09G035160 | PR-14 | 6.471086738  | 4.26631556  |
| TC03G009350 | PR-16 | 1.274992795  | 1.221255725 |
| TC05G009390 | PR-16 | -1.17371423  | 0           |
| TC05G025410 | PR-16 | 1.687828981  | 0           |
| TC05G025420 | PR-16 | 2.38964617   | 0           |
| TC05G025440 | PR-16 | 1.771075747  | 0           |
| TC05G025450 | PR-16 | 2.620742802  | 0           |
| TC05G025480 | PR-16 | 2.47117974   | 0           |
| TC05G025520 | PR-16 | 2.293160405  | 0           |

|             |       |             |             |
|-------------|-------|-------------|-------------|
| TC02G009590 | PR-17 | 2.120548009 | 3.244115829 |
| TC02G009600 | PR-17 | 6.168643409 | 5.90180022  |
| TC02G009610 | PR-17 | 4.503543332 | 3.884228221 |
