# Supplementary material for: Theobroma cacao L. pathogenesis-related gene tandem array members show diverse expression dynamics in response to pathogen colonization
Source: PubMed Central journal article supplement (PMC4869279; doi:10.1186/s12864-016-2693-3), 2016-05-17
Supplement: 12864_2016_2693_MOESM18_ESM.pdf [file 12864_2016_2693_MOESM18_ESM.pdf]

**Table S15. Sequences of qRT-PCR primers. Gene IDs are included in primer name.**

|               | <b>Sequence Name</b>    | <b>Sequence</b>               |                             |
|---------------|-------------------------|-------------------------------|-----------------------------|
| <b>PR-1s</b>  | Tc01_g003940F           | GGCAGTGCTGCTGCCTAGTGC         |                             |
|               | Tc01_g003940R           | TGGTATCTCGCAAGCCGGCTCG        |                             |
|               | Tc01_g034430F           | TGCGGAGGATGCCGTCAGGTTA        |                             |
|               | Tc01_g034430R           | GACTCTGGCACATCCTAGTTTGGT      |                             |
|               | Tc02_g002380F           | CATCCTTTGCGTTGCCTTCCTTG       |                             |
|               | Tc02_g002380R           | TGCGCGTAGGCCGGCCACTTG         |                             |
|               | Tc02_g002390F           | CTACGCCAACCAACGTAAGGGA        |                             |
|               | Tc02_g002390R           | AGGCCTTTCCGCCACCCACAAG        |                             |
|               | Tc02_g002400F           | CTGCAACCTCGAGCACTCCACT        |                             |
|               | Tc02_g002400R           | GTCTGTTGCACAAGTGTTAGTGTC      |                             |
|               | Tc02_g002410F           | GCAACCTCGTGCACTCCGGT          |                             |
|               | Tc02_g002410R           | CCTGGTGCACAAGTGTTAGAGGA       |                             |
|               | Tc02_g002420F           | CCTATTAGCTTCAACTCTAGTTCACGTT  |                             |
|               | Tc02_g002420R           | CGTAGGCCGCAACCTCGGG           |                             |
|               | Tc02_g002430F           | GACTTGGTGAACGCACACAATGCGAT    |                             |
|               | Tc02_g002430R           | GAATGCTCCAGGTTGCAGTCCCAA      |                             |
|               | Tc02_g010380F           | CGATGAGAAAACCGATTATGACTTGA    |                             |
|               | Tc02_g010380R           | CAAACAACAAAAGTACCCCCATGACC    |                             |
|               | Tc05_g005530F           | TGCGAAGAAGATAAAGTCGGCTTCCTT   |                             |
|               | Tc05_g005530R           | TTAGCGCACTGTTTGGCGAAGTAG      |                             |
|               | Tc09_g000720F           | CAATATCTAACACCCCAACATTCTAA    |                             |
|               | Tc09_g000720R           | CCCCAGAAGAGATTCTCCCATAATTG    |                             |
|               | Tc09_g016580F           | AGCTTCAGCACTCTTTTCCAGAG       |                             |
|               | Tc09_g016580R           | ATTTTTCTTCTCAGACCATGCAC       |                             |
|               | Tc09_g016590F           | TCATCGTTTTCTACTGCTCATCTCAAC   |                             |
|               | Tc09_g016590R           | CTTTGGTTAGCATACCACTGAGCATATCG |                             |
|               | Tc10_g000980F           | CTAGTGCGTGCAAGTAGGCCCTACG     |                             |
|               | Tc10_g000980R           | CCATTATTTCTGCATCTAAATCCCTCGC  |                             |
|               | <b>PR-3s</b>            | Tc01_g000770F                 | GTTGCCAGTATCGTGTCACCTGC     |
|               |                         | Tc01_g000770R                 | GGCATGTGCAAAAAAAGCAGCAATCTC |
| Tc02_g003890F |                         | TTTCTCACGCACAGACAGTAGCGA      |                             |
| Tc02_g003890R |                         | TTGTAGCGAAGGCAGGGAAAGACT      |                             |
| Tc04_g018100F |                         | GGGACTACTGTGATGAGACCGTT       |                             |
| Tc04_g018100R |                         | GAGATAACAGGGTCTGTGGCGATA      |                             |
| Tc04_g018110F |                         | GGAGGTCCTTGTTAACAATGGTG       |                             |
| Tc04_g018110R |                         | CTCCTCAACTGTGCCAGTCCTTGCG     |                             |
| Tc04_g018160F | GCACAACCGGTGACCTTACTACC |                               |                             |

|                |               |                               |
|----------------|---------------|-------------------------------|
|                | Tc04_g018160R | CTGTTCCCTTATAAAGCAATATCCCCATG |
|                | Tc06_g000440F | GATGACTCCTACAAGTATGTG         |
|                | Tc06_g000440R | GGAAGGCAAGAGTAGCATTCTGCT      |
| <b>PR-4s</b>   | Tc00_g012980F | AATGCTGTGAGTGCTTATTGCTCAACTTG |
|                | Tc00_g012980R | CACAATTGCTTCAGCTCTTGTACCTC    |
|                | Tc05_g027210F | CTTTTGTGGTCCAGCTGGTCCTCGA     |
|                | Tc05_g027210R | GCAATGCCGTTCCCATTTGTGTCAAGTT  |
|                | Tc05_g027220F | TTTAAACCCATTGACACTGATGGAAAC   |
|                | Tc05_g027220R | CCCAGCTATTCTGTGAAGGTTG        |
|                | Tc05_g027230F | TAATCCCATTGACACTGATGGACGA     |
|                | Tc05_g027230R | CCATTCCAAGGGCTTATCACCAACCT    |
|                | Tc05_g027250F | GAATCGTTGACACATGCGGCATTGAC    |
|                | Tc05_g027250R | TCGTCGTCACAATCCACAACCTTG      |
|                | Tc05_g027320F | GTTTCGAGGTTGCTTGTCTTTTTGGTT   |
|                | Tc05_g027320R | CAGGCAAACAATAGGCATCGGTG       |
|                | Tc10_g011130F | TAAACCCATTGACACTGATGGAAAA     |
|                | Tc10_g011130R | CCATTCCAAGGGCTTATCACCATCCA    |
| <b>PR-10s</b>  | Tc01_g031100F | TTGAGGGTGATGTAATTGGTGACAAG    |
|                | Tc01_g031100R | CCTCCACGACTTTGTACATTCCGAC     |
|                | Tc04_g028780F | CATCCCCAAGATTGTTCCCAAGGCCA    |
|                | Tc04_g028780R | CAGTATGTGAAGTTGTCTTTGTCAAC    |
|                | Tc04_g028860F | GACCAAGAAAATTCACCTGCTGCTTC    |
|                | Tc04_g028860R | GCCTTTATTTCTCCTCCTTGATATTG    |
| <b>Tubulin</b> | Tc06_g000360F | GGAGGAGTCTCTATAAGCTTGCAGTTGG  |
|                | Tc06_g000360R | ACATAAGCATAGCCAGCTAGAGCCAG    |
