# Supplementary material for: Theobroma cacao L. pathogenesis-related gene tandem array members show diverse expression dynamics in response to pathogen colonization
Source: PubMed Central journal article supplement (PMC4869279; doi:10.1186/s12864-016-2693-3), 2016-05-17
Supplement: 12864_2016_2693_MOESM19_ESM.pdf [file 12864_2016_2693_MOESM19_ESM.pdf]

**Supplemental Table S1 - GenBank Accession Numbers for PR Family Type Members**

| <b>PR Gene</b> | <b>Accession Number</b> |
|----------------|-------------------------|
| PR-1           | CAA31008.1              |
| PR-2           | AAA34103.1              |
| PR-3           | P17514.1                |
| PR-4           | CAA41437.1              |
| PR-5           | BAA74546.2              |
| PR-6           | AAA34183.1              |
| PR-7           | NP_001234257.1          |
| PR-8           | AAA33120.1              |
| PR-9           | AAA34108.1              |
| PR-10          | AAL09033.1              |
| PR-11          | CAA54373.1              |
| PR-12          | O24332.1                |
| PR-13          | AAC41678.1              |
| PR-14          | CAA91436.1              |
| PR-15          | CAA74595.1              |
| PR-16          | CAA63659.1              |
| PR-17          | BAA81904.1              |
