# Supplementary material for: Theobroma cacao L. pathogenesis-related gene tandem array members show diverse expression dynamics in response to pathogen colonization
Source: PubMed Central journal article supplement (PMC4869279; doi:10.1186/s12864-016-2693-3), 2016-05-17
Supplement: 12864_2016_2693_MOESM20_ESM.pdf [file 12864_2016_2693_MOESM20_ESM.pdf]

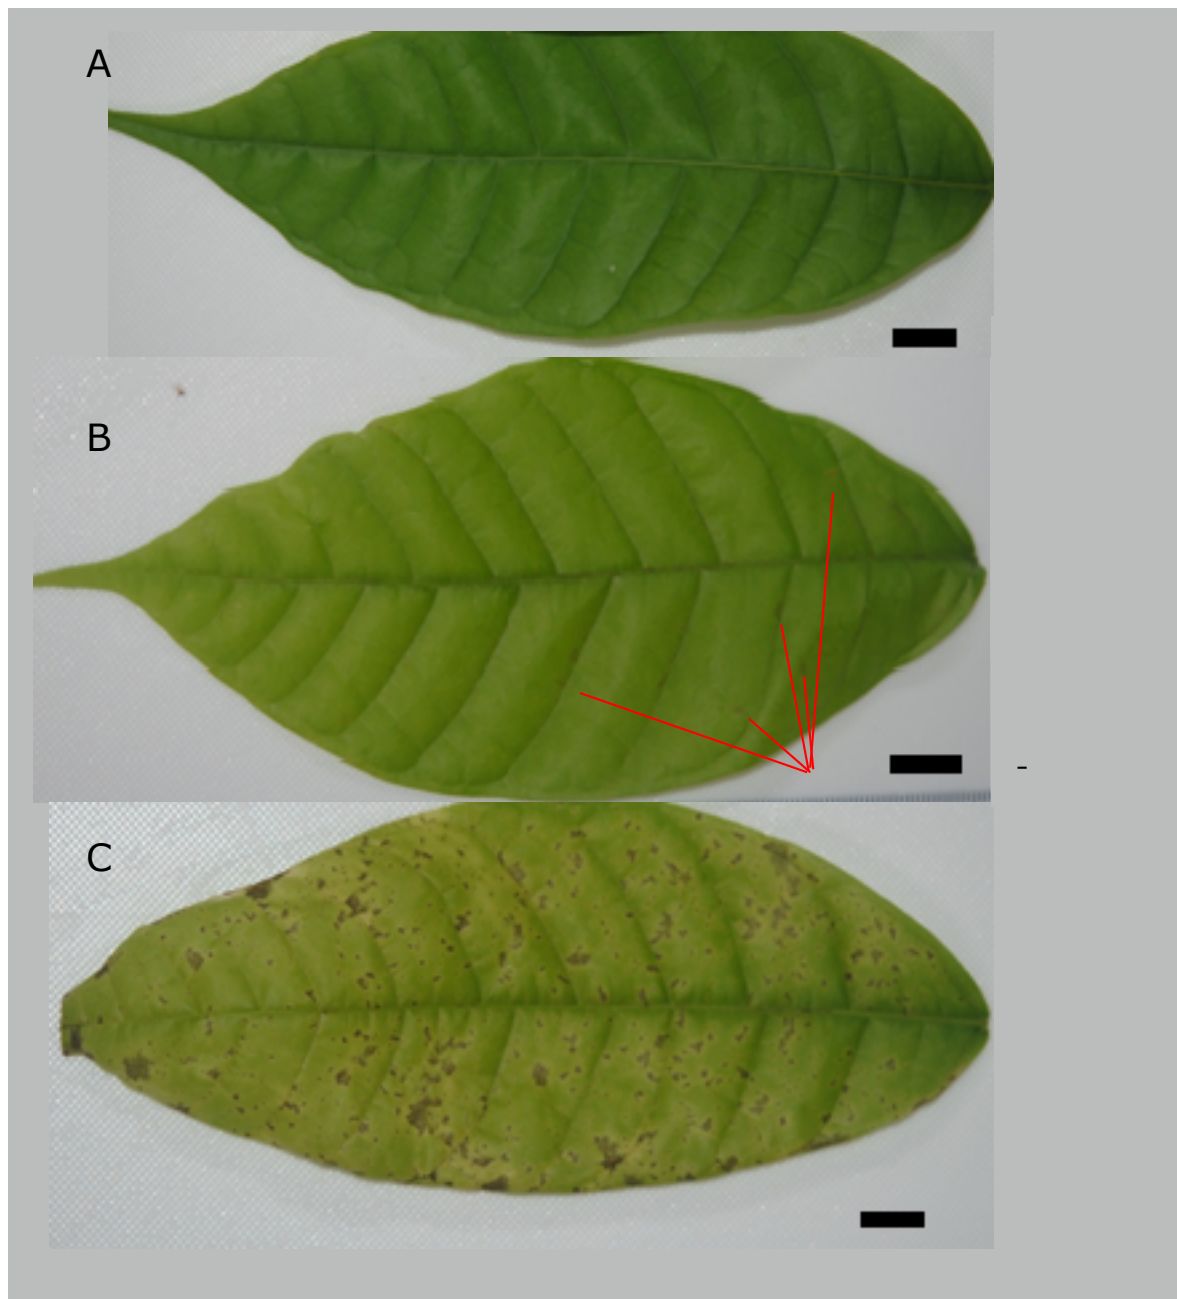

Figure S5. Representative images of leaves 72 h after treatment with A) distilled water, B) *Colletotrichum theobromicola*, and C) *Phytophthora palmivora*. Scale bars represent 1 cm. Red lines in B) indicate spots of tissue where lesions have begun to develop.
